# Supplementary material for: Regio- and stereoselective ring-opening reaction of spiro-epoxyoxindoles with ammonia under catalyst-free conditions
Source: Royal Society of Chemistry journal article supplement (doi:10.1039/c7gc00438a), 2017-01-01

## **Regio- and Stereoselective Ring-Opening Reaction of Spiro-Epoxyoxindoles with Ammonia under Catalyst-Free Conditions**

Bangzhi Zhang,<sup>a</sup> Yiping Li,<sup>a</sup> Guangjun Bao,<sup>a</sup> Gongming Zhu,<sup>a,b</sup> Jing Li,<sup>a</sup> Lijuan Wang,<sup>a</sup> Bao Zhang,<sup>a</sup> Wangsheng Sun,<sup>\*,a</sup> Liang Hong,<sup>\*,b</sup> and Rui Wang<sup>\*,a</sup>

<sup>a</sup> School of Life Sciences, Key Laboratory of Preclinical Study for New Drugs of Gansu Province, Lanzhou University, Lanzhou, 730000, P. R. China.

<sup>b</sup> School of Pharmaceutical Sciences, Sun Yat-sen University, Guangzhou, 510006, P. R. China.

E-mail: sunws@lzu.edu.cn; hongliang@sysu.edu.cn; wangrui@lzu.edu.cn

## Contents

|                                                  |        |
|--------------------------------------------------|--------|
| 1. General information                           | S2     |
| 2. General procedure for preparation of <b>2</b> | S3     |
| 3. Scale-up Experiment                           | S3     |
| 4. Transformations of the Products of <b>2a'</b> | S3-4   |
| 5. Characterization of <b>2-4</b>                | S5-16  |
| 6. Copies of HPLC spectra for <b>2-4</b>         | S17-25 |
| 7. Copies of NMR spectra for <b>2-4</b>          | S26-61 |

### 1. General information

Unless stated otherwise, all reactions were carried out in flame dried glassware. All solvents were purified and dried according to standard methods prior to use. Spiro-Epoxyoxindoles **1** were prepared according to literature.<sup>1</sup> <sup>1</sup>H and <sup>13</sup>C NMR spectra were recorded on a Varian instrument (300 MHz and 75 MHz, respectively) and internally referenced to tetramethylsilane signal or residual protio solvent signals. Data for <sup>1</sup>H NMR are recorded as follows: chemical shift ( $\delta$ , ppm), multiplicity (s = singlet, d = doublet, t = triplet, m = multiplet, q = quartet or unresolved, coupling constant(s) in Hz, integration). Data for <sup>13</sup>C NMR are reported in terms of chemical shift ( $\delta$ , ppm). IR spectra were recorded on a FT-IR spectrometer and only major peaks were reported in cm<sup>-1</sup>. Optical rotations were reported as follows:  $[\alpha]_{D}^{rt}$  (c: g/100 mL, in solvent). High resolution mass spectra (HRMS) were obtained by the ESI ionization sources. The ee value determination was carried out using chiral HPLC with Daicel Chiracel column on Waters with a 996 UV-detector.

[1] S. Hajra, S. Maity ,R. Maity, *Org. Lett.* **2015**, 17, 3430–3433

## 2. General procedure for preparation of 2

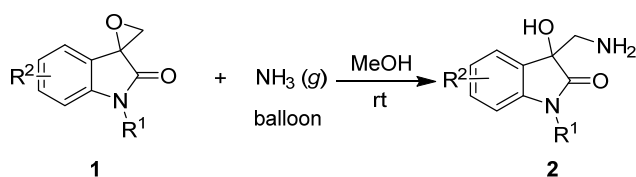

In an ordinary vial, spiro-epoxyoxindoles **1** (0.10 mmol) was added to MeOH (1.0 mL) in the ammonia atmosphere at room temperature. The mixture was stirred at this temperature for the requisite amount of time as monitored by TLC. The solvent was removed under vacuum and residue was chromatographed on silica gel (DCM:MeOH 20:1) and fractions were collected and concentrated in vacuo to provide the pure desired products **2**.

## 3. Scale-up Experiment

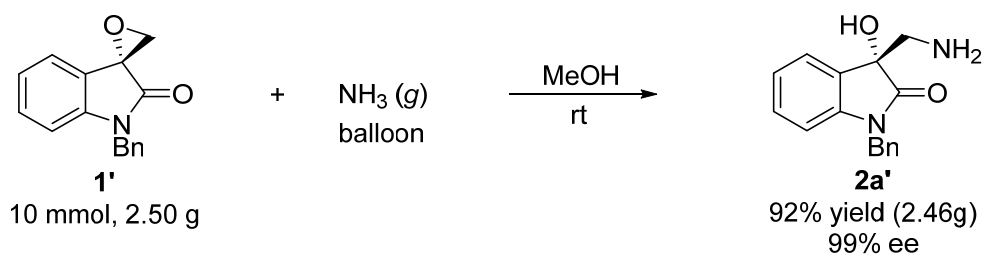

In an ordinary vial, spiro-epoxyoxindoles **1'** (10.0 mmol) was added to MeOH (60.0 mL) in the ammonia atmosphere at room temperature. The mixture was stirred at this temperature for the requisite amount of time as monitored by TLC. The solvent was removed under vacuum and residue was chromatographed on silica gel (DCM:MeOH 20:1) and fractions were collected and concentrated in vacuo to provide the pure desired products **2a'**.

## 4. Transformations of the Product of 2a'

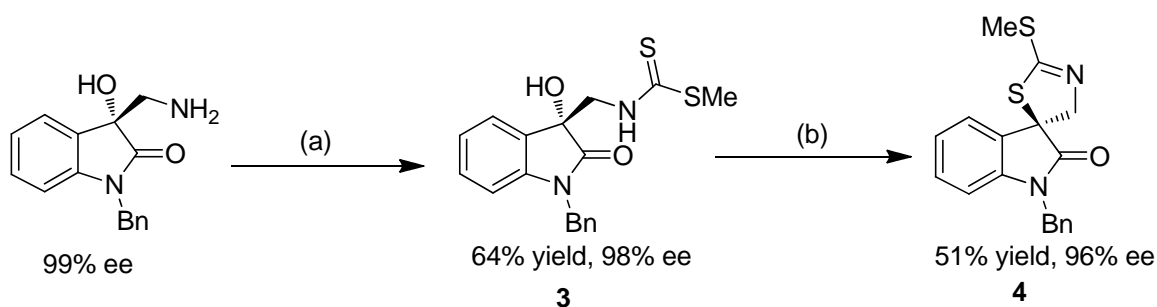

(a) To a solution of **2a'** (80 mg, 0.3 mmol) in CH<sub>2</sub>Cl<sub>2</sub> (1 mL) was added dry pyridine (48 μL) and CS<sub>2</sub> (14 μL) at 0 °C. After 4h, MeI (15 μL) was added and the mixture stirred at room temperature for 4h. Then the mixture was acidified with 1N HCl and extracted with EtOAc. The combined organic layers were washed with water, brine, dried over Na<sub>2</sub>SO<sub>4</sub> and the solvent was removed under vacuum and residue was chromatographed on silica gel (petroleum ether/AcOEt 1:1) and fractions were collected and concentrated in vacuo to provide the pure desired products **3** (68.8 mg, 64% yield).

(b) To a solution of **3** (0.22 mmol) in CH<sub>2</sub>Cl<sub>2</sub> (1 mL) was added dry pyridine (35 μL) and MsCl (58 μL) at room temperature for overnight. Then the mixture was neutralized with 1N HCl, and extracted with EtOAc. The combined organic layers were washed with water, brine, dried over Na<sub>2</sub>SO<sub>4</sub> and the solvent was removed under vacuum and residue was chromatographed on silica gel and fractions were collected and concentrated in vacuo to provide the pure desired products **4** (38 mg, 51% yield).

## 5. Characterization of 2-4

### 3-(aminomethyl)-1-benzyl-3-hydroxyindolin-2-one (2a).

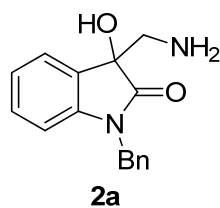

90% yield;

White solid, m.p. 95 – 97 °C;

**<sup>1</sup>H NMR (300 MHz, CDCl<sub>3</sub>)** δ 7.46 – 7.14 (m, 7H), 7.05 (t, *J* = 7.3 Hz, 1H), 6.70 (d, *J* = 7.8 Hz, 1H), 4.96 (d, *J* = 15.7 Hz, 1H), 4.78 (d, *J* = 15.7 Hz, 1H), 3.08 (s, 2H), 2.87 (bs, 3H);

**<sup>13</sup>C NMR (75 MHz, CDCl<sub>3</sub>)** δ 178.1, 142.6, 135.4, 129.7, 129.2, 128.8, 127.7, 127.1, 123.8, 123.1, 109.5, 75.0, 48.6, 43.6;

**IR:** 3370, 1716, 1614, 1468, 1358, 1266, 1177, 1081, 737 cm<sup>-1</sup>;

**HRMS (ESI):** C<sub>16</sub>H<sub>16</sub>N<sub>2</sub>O<sub>2</sub>+H, Calc: 269.1285, Found: 269.1289.

### 3-(aminomethyl)-1-benzyl-4-chloro-3-hydroxyindolin-2-one (2b).

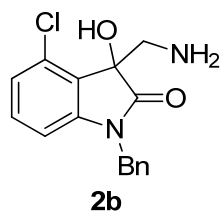

86% yield;

White solid, m.p. 60 – 62 °C;

**<sup>1</sup>H NMR (300 MHz, DMSO)** δ 7.43 – 7.28 (m, 4H), 7.23 (dd, *J* = 16.5, 7.8 Hz, 2H), 7.00 (d, *J* = 8.1 Hz, 1H), 6.74 (d, *J* = 7.8 Hz, 1H), 6.22 (bs, 1H), 4.88 (q, *J* = 16.1 Hz, 2H), 3.35 (bs, 1H), 3.34 (d, *J* = 12.4 Hz, 3H), 3.11 (d, *J* = 12.4 Hz, 1H);

**<sup>13</sup>C NMR (75 MHz, DMSO)** δ 177.16, 145.28, 135.94, 130.67, 130.18, 128.54, 127.32, 127.15, 126.66, 123.18, 107.91, 77.90, 45.58, 42.63;

**IR:** 3435, 2252, 1657, 1027, 824, 761 cm<sup>-1</sup>;

**HRMS (ESI):** C<sub>16</sub>H<sub>15</sub>ClN<sub>2</sub>O<sub>2</sub>+H, Calc: 303.0895, Found: 303.0900.

**3-(aminomethyl)-1-benzyl-5-fluoro-3-hydroxyindolin-2-one (2c).**

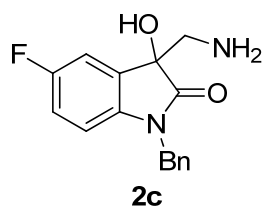

83% yield;

White solid, m.p. 154 – 156 °C;

**<sup>1</sup>H NMR (300 MHz, CDCl<sub>3</sub>)** δ 7.36 – 7.19 (m, 5H), 7.11 (dd, *J* = 7.5, 2.5 Hz, 1H), 6.88 (td, *J* = 8.9, 2.6 Hz, 1H), 6.60 (dd, *J* = 8.6, 4.0 Hz, 1H), 4.93 (d, *J* = 15.8 Hz, 1H), 4.75 (d, *J* = 15.8 Hz, 1H), 3.18 (bs, 3H), 3.05 (q, *J* = 13.3 Hz, 2H);

**<sup>13</sup>C NMR (75 MHz, CDCl<sub>3</sub>)** δ 177.91, 159.40 (d, *J* = 240.75 Hz), 138.31, 135.03, 130.96 (d, *J* = 7.5 Hz), 128.87, 127.78, 127.06, 115.88 (d, *J* = 23.25 Hz), 112.08 (d, *J* = 24.75 Hz), 110.19 (d, *J* = 7.5 Hz), 75.18, 48.40, 43.71;

**IR:** 3366, 1718, 1491, 1345, 1267, 1174, 1026, 736 cm<sup>-1</sup>;

**HRMS (ESI):** C<sub>16</sub>H<sub>15</sub>FN<sub>2</sub>O<sub>2</sub>+H, Calc: 287.1190, Found: 287.1194.

**3-(aminomethyl)-1-benzyl-5-chloro-3-hydroxyindolin-2-one (2d).**

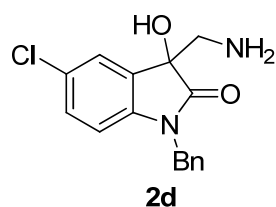

85% yield;

White solid, m.p. 110 – 112 °C;

**<sup>1</sup>H NMR (300 MHz, CDCl<sub>3</sub>)** δ 7.39 – 7.19 (m, 6H), 7.14 (dd, *J* = 8.3, 2.0 Hz, 1H), 6.59 (d, *J* = 8.3 Hz, 1H), 4.91 (d, *J* = 15.8 Hz, 1H), 4.73 (d, *J* = 15.8 Hz, 1H), 3.12 (bs, 3H), 3.06 – 2.90 (m, 2H);

**<sup>13</sup>C NMR (75 MHz, CDCl<sub>3</sub>)** δ 177.73, 140.81, 134.87, 131.25, 129.36, 128.83, 128.47, 127.75, 126.99, 124.31, 110.45, 75.41, 48.50, 43.60;

**IR:** 3345, 1722, 1484, 1343, 1174, 813, 736 cm<sup>-1</sup>;

**HRMS (ESI):** C<sub>16</sub>H<sub>15</sub>ClN<sub>2</sub>O<sub>2</sub>+H, Calc: 303.0895, Found: 303.0896.

**3-(aminomethyl)-1-benzyl-5-bromo-3-hydroxyindolin-2-one (2e).**

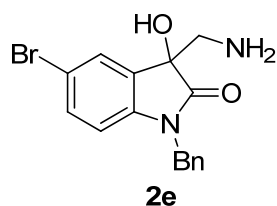

81% yield;

White solid, m.p. 115 – 117 °C;

**<sup>1</sup>H NMR (300 MHz, DMSO)** δ 7.54 (d, *J* = 2.0 Hz, 1H), 7.47 – 7.19 (m, 6H), 6.76 (d, *J* = 8.3 Hz, 1H), 4.87 (q, *J* = 16.0 Hz, 2H), 3.39 (bs, 3H), 3.00 (d, *J* = 12.7 Hz, 1H), 2.89 (d, *J* = 12.7 Hz, 1H);

**<sup>13</sup>C NMR (75 MHz, DMSO)** δ 177.14, 142.05, 135.97, 133.36, 131.48, 128.60, 127.36, 127.13, 127.00, 114.25, 110.93, 76.49, 48.38, 42.48;

**IR:** 3436, 1716, 1614, 1468, 1358, 1266, 1177, 1054, 761 cm<sup>-1</sup>;

**HRMS (ESI):** C<sub>16</sub>H<sub>15</sub>BrN<sub>2</sub>O<sub>2</sub>+H, Calc: 347.0390, Found: 347.0394.

**3-(aminomethyl)-1-benzyl-3-hydroxy-5-methylindolin-2-one (2f).**

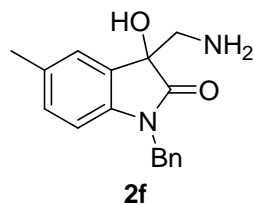

73% yield;

White solid, m.p. 98 – 101 °C;

**<sup>1</sup>H NMR (300 MHz, DMSO)** δ 7.45 – 7.19 (m, 6H), 7.00 (d, *J* = 7.9 Hz, 1H), 6.68 (d, *J* = 7.9 Hz, 1H), 4.84 (q, *J* = 15.9 Hz, 2H), 3.29 (bs, 3H), 2.91 (q, *J* = 12.9 Hz, 2H), 2.25 (s, 3H);

**<sup>13</sup>C NMR (75 MHz, DMSO)** δ 177.40, 140.24, 136.39, 131.25, 130.65, 129.04, 128.54, 127.26, 127.14, 124.72, 108.75, 76.07, 48.53, 42.44, 20.70;

**IR:** 3438, 2250, 1656, 1468, 1358, 1266, 1177, 1055, 761 cm<sup>-1</sup>;

**HRMS (ESI):** C<sub>17</sub>H<sub>18</sub>N<sub>2</sub>O<sub>2</sub>+H, Calc: 283.1441, Found: 283.1443.

**3-(aminomethyl)-1-benzyl-3-hydroxy-5-methoxyindolin-2-one (2g).**

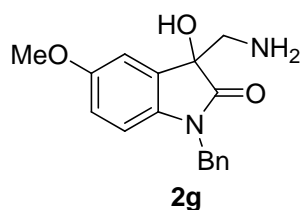

76% yield;

White solid, m.p. 90 – 92 °C;

**<sup>1</sup>H NMR (300 MHz, CDCl<sub>3</sub>)** δ 7.35 – 7.15 (m, 5H), 6.97 (d, *J* = 2.4 Hz, 1H), 6.69 (dd, *J* = 8.5, 2.4 Hz, 1H), 6.56 (d, *J* = 8.5 Hz, 1H), 4.91 (d, *J* = 15.7 Hz, 1H), 4.70 (d, *J* = 15.7 Hz, 1H), 3.71 (s, 3H), 3.15 (bs, 3H), 2.99 (s, 2H);

**<sup>13</sup>C NMR (75 MHz, CDCl<sub>3</sub>)** δ 177.80, 156.18, 135.52, 135.41, 130.70, 128.70, 127.53, 127.02, 113.95, 110.76, 109.94, 75.67, 55.64, 48.74, 43.54;

**IR:** 3368, 1710, 1604, 1494, 1346, 1275, 1179, 1018, 734 cm<sup>-1</sup>;

**HRMS (ESI):** C<sub>17</sub>H<sub>18</sub>N<sub>2</sub>O<sub>3</sub>+H, Calc: 299.1390, Found: 299.1394.

**3-(aminomethyl)-1-benzyl-6-chloro-3-hydroxyindolin-2-one (2h).**

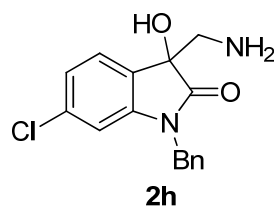

89% yield;

White solid, m.p. 79 – 81 °C;

**<sup>1</sup>H NMR (300 MHz, CDCl<sub>3</sub>)** δ 7.38 – 7.17 (m, 6H), 7.01 (dd, *J* = 7.9, 1.6 Hz, 1H), 6.68 (d, *J* = 1.6 Hz, 1H), 4.92 (d, *J* = 15.8 Hz, 1H), 4.71 (d, *J* = 15.8 Hz, 1H), 3.02 (q, *J* = 13.1 Hz, 2H), 3.01 (bs, 3H);

**<sup>13</sup>C NMR (75 MHz, CDCl<sub>3</sub>)** δ 178.08, 143.76, 135.36, 134.83, 128.92, 127.85, 127.74, 127.01, 124.78, 122.99, 110.04, 74.84, 48.43, 43.63;

**IR:** 3340, 1726, 1611, 1490, 1374, 1265, 1178, 1075, 738 cm<sup>-1</sup>;

**HRMS (ESI):** C<sub>16</sub>H<sub>15</sub>ClN<sub>2</sub>O<sub>2</sub>+H, Calc: 303.0895, Found: 303.0894.



**3-(aminomethyl)-1-benzyl-6-bromo-3-hydroxyindolin-2-one (2i).**

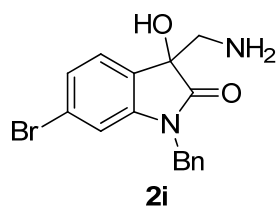

83% yield;

White solid, m.p. 99 – 101 °C;

**<sup>1</sup>H NMR (300 MHz, CDCl<sub>3</sub>)** δ 7.42 – 7.04 (m, 7H), 6.83 (s, 1H), 4.91 (d, *J* = 15.8 Hz, 1H), 4.70 (d, *J* = 15.8 Hz, 1H), 2.98 (d, *J* = 13.7 Hz, 2H), 2.88 (bs, 3H);

**<sup>13</sup>C NMR (75 MHz, CDCl<sub>3</sub>)** δ 177.96, 143.90, 134.83, 128.95, 128.26, 127.88, 127.02, 125.98, 125.15, 123.30, 112.78, 74.84, 48.36, 43.64;

**IR:** 3361, 1720, 1605, 1486, 1430, 1353, 1176, 1117, 1061, 734 cm<sup>-1</sup>;

**HRMS (ESI):** C<sub>16</sub>H<sub>15</sub>BrN<sub>2</sub>O<sub>2</sub>+H, Calc: 347.0390, Found: 347.0389.

**3-(aminomethyl)-1-benzyl-7-chloro-3-hydroxyindolin-2-one (2j).**

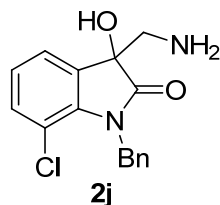

78% yield;

White solid, m.p. 83 -85 °C;

**<sup>1</sup>H NMR (300 MHz, CDCl<sub>3</sub>)** δ 7.35 – 7.12 (m, 7H), 6.99 (t, *J* = 7.8 Hz, 1H), 5.28 (s, 2H), 3.05 (d, *J* = 13.2 Hz, 2H), 3.02 (bs, 3H);

**<sup>13</sup>C NMR (75 MHz, CDCl<sub>3</sub>)** δ 178.73, 138.60, 137.08, 132.32, 132.17, 128.57, 127.18, 126.29, 124.13, 122.43, 115.72, 74.39, 48.69, 44.59;

**IR:** 3332, 1721, 1608, 1452, 1353, 1267, 1134, 735 cm<sup>-1</sup>;

**HRMS (ESI):** C<sub>16</sub>H<sub>15</sub>ClN<sub>2</sub>O<sub>2</sub>+H, Calc: 303.0895, Found: 303.0894.

**3-(aminomethyl)-1-benzyl-3-hydroxy-7-methylindolin-2-one (2k).**

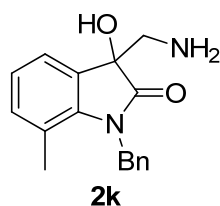

75% yield;

White solid, m.p. 82 – 84 °C;

**<sup>1</sup>H NMR (300 MHz, CDCl<sub>3</sub>)** δ 7.35 – 7.18 (m, 4H), 7.14 (d, *J* = 7.0 Hz, 2H), 6.96 (d, *J* = 4.6 Hz, 2H), 5.16 (d, *J* = 16.9 Hz, 1H), 5.06 (d, *J* = 16.9 Hz, 1H), 3.03 (s, 5H), 2.21 (s, 3H);

**<sup>13</sup>C NMR (75 MHz, CDCl<sub>3</sub>)** δ 179.14, 140.43, 137.17, 133.53, 130.14, 128.81, 127.15, 125.50, 123.22, 121.66, 120.17, 74.44, 48.94, 44.71, 18.62;

**IR:** 3365, 1714, 1452, 1354, 1163, 733 cm<sup>-1</sup>;

**HRMS (ESI):** C<sub>17</sub>H<sub>18</sub>N<sub>2</sub>O<sub>2</sub>+H, Calc: 283.1441, Found: 283.1443.

**3-(aminomethyl)-3-hydroxyindolin-2-one (2l).**

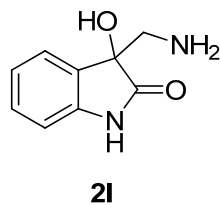

80% yield;

White solid, m.p. 214 – 216 °C;

**<sup>1</sup>H NMR (300 MHz, DMSO)** δ 10.37 (bs, 1H), 7.35 (d, *J* = 7.3 Hz, 1H), 7.23 (dd, *J* = 13.5, 5.8 Hz, 1H), 6.98 (t, *J* = 7.4 Hz, 1H), 6.81 (dd, *J* = 14.2, 7.6 Hz, 1H), 3.39 (bs, 3H), 2.92 (q, *J* = 13.2 Hz, 2H);

**<sup>13</sup>C NMR (75 MHz, DMSO)** δ 178.24, 141.91, 130.29, 129.45, 124.37, 121.75, 109.82, 74.12, 46.61;

**IR:** 3432, 2251, 1656, 1027, 737 cm<sup>-1</sup>;

**HRMS (ESI):** C<sub>9</sub>H<sub>10</sub>N<sub>2</sub>O<sub>2</sub>+H, Calc: 179.0815, Found: 179.0815.

**1-acetyl-3-(aminomethyl)-3-hydroxyindolin-2-one (2m).**

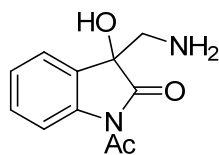

**2m**

88% yield;

White solid, m.p. 136 – 138 °C;

**<sup>1</sup>H NMR (300 MHz, CDCl<sub>3</sub>)** δ 9.80 (bs, 1H), 7.88 (d, *J* = 7.9 Hz, 1H), 7.37 (t, *J* = 7.4 Hz, 2H), 7.13 (t, *J* = 7.5 Hz, 1H), 6.59 (bs, 1H), 6.30 (d, *J* = 24.3 Hz, 1H), 3.22 (d, *J* = 5.8 Hz, 1H), 2.93 (d, *J* = 5.8 Hz, 1H), 2.19 (s, 3H);

**<sup>13</sup>C NMR (75 MHz, CDCl<sub>3</sub>)** δ 173.21, 168.85, 136.78, 129.51, 127.17, 126.72, 124.53, 124.25, 57.49, 54.15, 24.39;

**IR:** 3275, 1668, 1522, 1451, 1299, 927, 735 cm<sup>-1</sup>;

**HRMS (ESI):** C<sub>11</sub>H<sub>12</sub>N<sub>2</sub>O<sub>3</sub>+ Na, Calc: 243.0740, Found: 243.0745.

**3-(aminomethyl)-3-hydroxy-1-methylindolin-2-one (2n).**

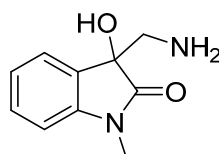

**2n**

87% yield;

White solid, m.p. 68 – 71 °C;

**<sup>1</sup>H NMR (300 MHz, CDCl<sub>3</sub>)** δ 7.42 – 7.23 (m, 2H), 7.07 (t, *J* = 7.5 Hz, 1H), 6.82 (d, *J* = 7.7 Hz, 1H), 3.15 (s, 3H), 3.15 (bs, 3H), 3.04 – 2.86 (m, 2H);

**<sup>13</sup>C NMR (75 MHz, CDCl<sub>3</sub>)** δ 177.87, 143.28, 129.65, 129.36, 123.65, 123.05, 108.38, 75.12, 48.36, 26.06;

**IR:** 2929, 1722, 1614, 1470, 1375, 1249, 1121, 839 cm<sup>-1</sup>;

**HRMS (ESI):** C<sub>11</sub>H<sub>12</sub>N<sub>2</sub>O<sub>3</sub>+H, Calc: 193.0972, Found: 193.0973.

**1-allyl-3-(aminomethyl)-3-hydroxyindolin-2-one (2o).**

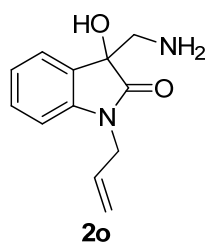

85% yield;

White solid, m.p. 62– 64°C;

**<sup>1</sup>H NMR (300 MHz, CDCl<sub>3</sub>)** δ 7.35 (d, *J* = 7.2 Hz, 1H), 7.28 (t, *J* = 7.7 Hz, 1H), 7.07 (t, *J* = 7.4 Hz, 1H), 6.81 (d, *J* = 7.8 Hz, 1H), 5.80 (ddd, *J* = 22.1, 10.2, 5.1 Hz, 1H), 5.22 (d, *J* = 7.2 Hz, 1H), 5.18 (s, 1H), 4.34 (dd, *J* = 16.4, 4.9 Hz, 1H), 4.20 (dd, *J* = 16.4, 5.0 Hz, 1H), 3.24 (s, 3H), 2.96 (s, 2H);

**<sup>13</sup>C NMR (75 MHz, CDCl<sub>3</sub>)** δ 177.65, 142.41, 130.98, 129.51, 129.35, 123.71, 123.00, 117.58, 109.26, 75.12, 48.48, 42.07;

**IR:** 3360, 1715, 1613, 1468, 1364, 1184, 1106, 929, 755 cm<sup>-1</sup>;

**HRMS (ESI):** C<sub>12</sub>H<sub>14</sub>N<sub>2</sub>O<sub>2</sub>+H, Calc: 219.1128, Found: 219.1132.

**3-(aminomethyl)-3-hydroxy-1-(4-methoxybenzyl)indolin-2-one (2p).**

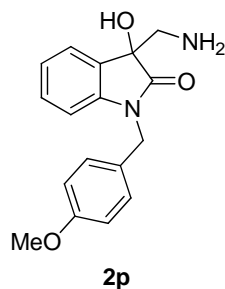

89% yield;

White solid, m.p. 66 – 68°C;

**<sup>1</sup>H NMR (300 MHz, CDCl<sub>3</sub>)** δ 7.34 (d, *J* = 7.3 Hz, 1H), 7.18 (dd, *J* = 9.5, 4.7 Hz, 3H), 7.02 (t, *J* = 7.4 Hz, 1H), 6.81 (d, *J* = 8.4 Hz, 2H), 6.71 (d, *J* = 7.8 Hz, 1H), 4.86 (d, *J* = 15.4 Hz, 1H), 4.69 (d, *J* = 15.5 Hz, 1H), 3.74 (d, *J* = 4.6 Hz, 3H), 3.24 (bs, 3H), 3.01 (s, 2H);

**<sup>13</sup>C NMR (75 MHz, CDCl<sub>3</sub>)** δ 178.00, 158.93, 142.39, 129.52, 129.37, 128.45, 127.36, 123.72, 123.02, 114.08, 109.44, 75.25, 55.14, 48.53, 42.97;

**IR:** 3357, 1716, 1613, 1513, 1356, 1248, 1178, 1109, 1032, 751 cm<sup>-1</sup>;

**HRMS (ESI):** C<sub>17</sub>H<sub>18</sub>N<sub>2</sub>O<sub>3</sub>+H, Calc: 299.1390, Found: 299.1394.

**(R)-3-(aminomethyl)-1-benzyl-3-hydroxyindolin-2-one (2a').**

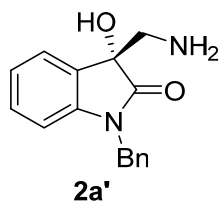

91% yield;

$[\alpha]_{\text{D}}^{\text{rt}} = -46^{\circ}$  (c = 1.00, CHCl<sub>3</sub>);

**HPLC:** DAICEL CHIRALCEL OD, Hexane/EtOH = 7/3, flow rate = 1.0 ml/min, retention time:

$t_{\text{major}} = 8.9$ ,  $t_{\text{minor}} = 6.1$ , 99% ee.

**(R)-3-(aminomethyl)-1-benzyl-3-hydroxy-5-methylindolin-2-one (2f').**

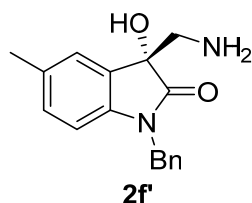

75% yield;

$[\alpha]_{\text{D}}^{\text{rt}} = -37^{\circ}$  (c = 1.00, CHCl<sub>3</sub>);

**HPLC:** DAICEL CHIRALCEL OD, Hexane/EtOH = 7/3, flow rate = 1.0 ml/min, retention time:

$t_{\text{major}} = 9.7$ ,  $t_{\text{minor}} = 5.7$ , 97% ee.

**(R)-3-(aminomethyl)-1-benzyl-3-hydroxy-5-methoxyindolin-2-one (2g').**

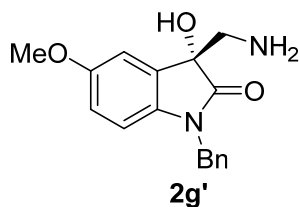

74% yield;

$[\alpha]_{\text{D}}^{\text{rt}} = -106^{\circ}$  (c = 1.00, CHCl<sub>3</sub>);

**HPLC:** DAICEL CHIRALCEL OD, Hexane/EtOH = 7/3, flow rate = 1.0 ml/min, retention time:

$t_{\text{major}} = 12.1$ ,  $t_{\text{minor}} = 7.1$ , 99% ee.

**(R)-3-(aminomethyl)-1-benzyl-6-chloro-3-hydroxyindolin-2-one (2h')**

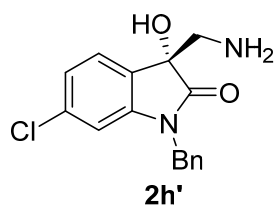

88% yield;

$[\alpha]_{\text{D}}^{\text{rt}} = -22^\circ$  (c = 1.00, CHCl<sub>3</sub>);

**HPLC:** DAICEL CHIRALCEL OD, Hexane/EtOH = 7/3, flow rate = 1.0 ml/min, retention time:

$t_{\text{major}} = 8.6$ ,  $t_{\text{minor}} = 6.5$ , 98% ee.

**(R)-3-(aminomethyl)-1-benzyl-6-bromo-3-hydroxyindolin-2-one (2i')**

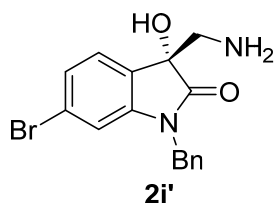

84% yield;

$[\alpha]_{\text{D}}^{\text{rt}} = -32^\circ$  (c = 1.00, CHCl<sub>3</sub>);

**HPLC:** DAICEL CHIRALCEL OD, Hexane/EtOH = 7/3, flow rate = 1.0 ml/min, retention time:

$t_{\text{major}} = 8.9$ ,  $t_{\text{minor}} = 6.7$ , 96% ee.

**(R)-3-(aminomethyl)-1-benzyl-7-chloro-3-hydroxyindolin-2-one (2j')**

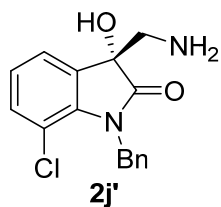

78% yield;

$[\alpha]_{\text{D}}^{\text{rt}} = -49^\circ$  (c = 1.00, CHCl<sub>3</sub>).

**HPLC:** DAICEL CHIRALCEL OD, Hexane/EtOH = 7/3, flow rate = 1.0 ml/min, retention time:

$t_{\text{major}} = 10.4$ ,  $t_{\text{minor}} = 6.3$ , 96% ee.

**(R)-3-(aminomethyl)-3-hydroxy-1-(4-methoxybenzyl)indolin-2-one (2p').**

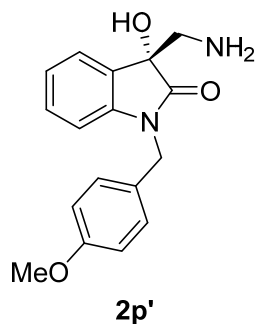

86% yield;

$[\alpha]_{\text{D}}^{\text{rt}} = -51^{\circ}$  (c = 1.00, CHCl<sub>3</sub>).

**HPLC:** DAICEL CHIRALCEL OD, Hexane/EtOH = 7/3, flow rate = 1.0 ml/min, retention time:

$t_{\text{major}} = 9.9$ ,  $t_{\text{minor}} = 7.1$ , 98% ee.

**methyl (R)-((1-benzyl-3-hydroxy-2-oxoindolin-3-yl)methyl)carbamodithioate (3).**

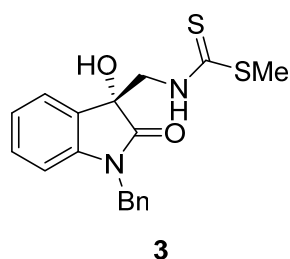

64% yield;

White solid, m.p. 67 – 68 °C;

**<sup>1</sup>H NMR (300 MHz, CDCl<sub>3</sub>)** δ 8.30 (bs, 1H), 7.42 (d, *J* = 7.3 Hz, 1H), 7.36 – 7.16 (m, 6H), 7.05 (t, *J* = 7.5 Hz, 1H), 6.70 (d, *J* = 7.8 Hz, 1H), 4.87 (d, *J* = 15.8 Hz, 1H), 4.82 (bs, 1H), 4.71 (d, *J* = 15.7 Hz, 1H), 4.54 (dd, *J* = 14.3, 6.2 Hz, 1H), 3.96 (dd, *J* = 14.3, 4.0 Hz, 1H), 2.59 (s, 3H);

**<sup>13</sup>C NMR (75 MHz, CDCl<sub>3</sub>)** δ 200.96, 176.72, 141.70, 134.72, 130.20, 128.84, 128.15, 127.77, 127.08, 124.20, 123.68, 109.91, 74.68, 52.45, 43.84, 18.22;

**IR:** 3454, 1716, 1614, 1358, 1260, 1177, 1005, 730 cm<sup>-1</sup>;

**HRMS (ESI):** C<sub>18</sub>H<sub>18</sub>N<sub>2</sub>O<sub>2</sub>S<sub>2</sub>+H, Calc: 359.0882, Found: 359.0889.

**HPLC:** DAICEL CHIRALCEL AS, Hexane/EtOH = 8/2, flow rate = 1.0 ml/min, retention time:

$t_{\text{major}} = 17.9$ ,  $t_{\text{minor}} = 13.6$ , 98% ee.

**(R)-1-benzyl-2'-(methylthio)-4'H-spiro[indoline-3,5'-thiazol]-2-one (4).**

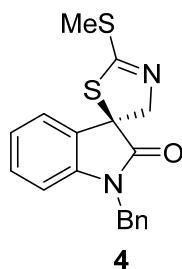

51% yield;

White solid, m.p. 43 – 45 °C;

**<sup>1</sup>H NMR (300 MHz, CDCl<sub>3</sub>)** δ 7.46 – 7.24 (m, 6H), 7.20 (td, *J* = 7.8, 1.2 Hz, 1H), 7.06 (td, *J* = 7.6, 0.8 Hz, 1H), 6.73 (d, *J* = 7.8 Hz, 1H), 4.92 (d, *J* = 1.7 Hz, 2H), 4.71 (d, *J* = 15.1 Hz, 1H), 4.52 (d, *J* = 15.1 Hz, 1H), 2.63 (s, 3H);

**<sup>13</sup>C NMR (75 MHz, CDCl<sub>3</sub>)** δ 176.02, 164.03, 141.35, 135.15, 130.66, 129.54, 128.85, 127.82, 127.28, 124.11, 123.60, 109.46, 74.97, 64.23, 44.32, 15.66;

**IR:** 3378, 1745, 1614, 1490, 1358, 1249, 1177, 1081, 737 cm<sup>-1</sup>;

**HRMS (ESI):** C<sub>18</sub>H<sub>16</sub>N<sub>2</sub>OS<sub>2</sub>+H, Calc: 341.0777, Found: 341.0785;

**[α]<sub>D</sub><sup>rt</sup>** = - 72°(c = 1.00, CHCl<sub>3</sub>);

**HPLC:** DAICEL CHIRALCEL AD, Hexane/EtOH = 8/2, flow rate = 1.0 ml/min, retention time:

*t*<sub>major</sub> = 17.8, *t*<sub>minor</sub> = 21.2, 96% ee.



## 6. Copies of HPLC spectra for 2-4

(*R*)-3-(aminomethyl)-1-benzyl-3-hydroxyindolin-2-one (Table 3, entry 1)

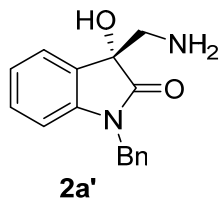

Chiralpak OD-H column, hexane/EtOH (7:3), flow rate 1.0 mL/min

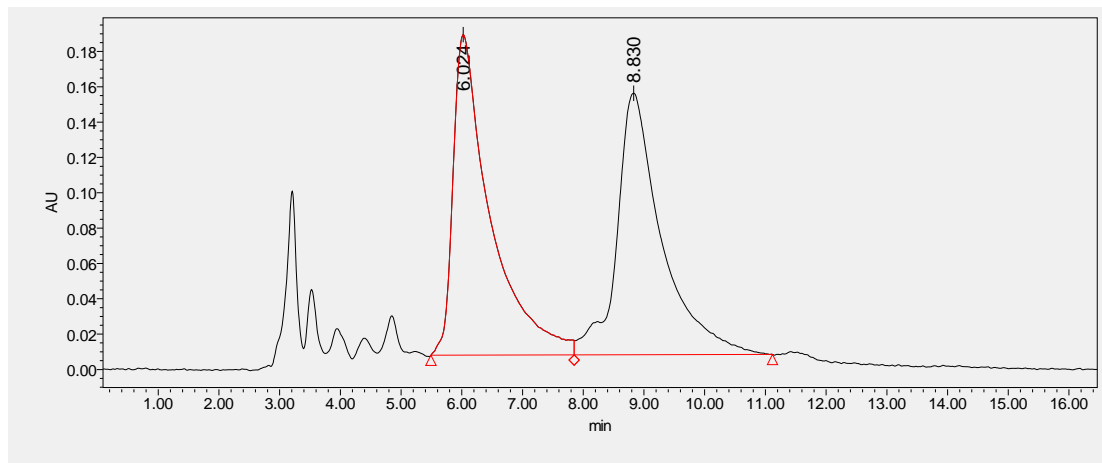

|   | Retention time | Area    | % Area | Height | Integral type |
|---|----------------|---------|--------|--------|---------------|
| 1 | 6.024          | 7715904 | 50.48  | 181448 | bv            |
| 2 | 8.830          | 7569897 | 49.52  | 148061 | vb            |

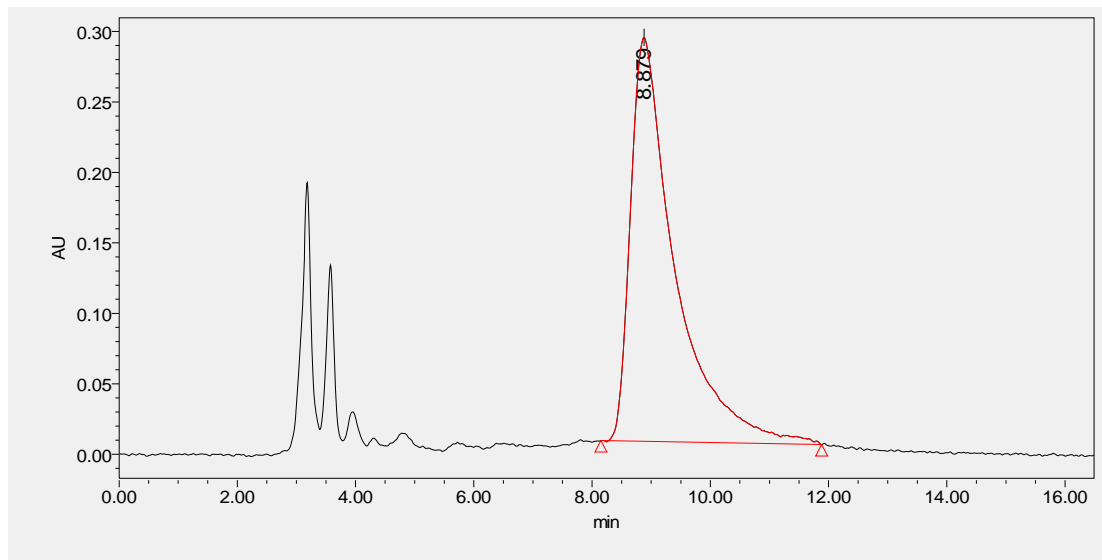

|   | Retention time | Area     | % Area | Height | Integral type |
|---|----------------|----------|--------|--------|---------------|
| 1 | 8.879          | 14943171 | 100.00 | 286775 | bb            |

(*R*)-3-(aminomethyl)-1-benzyl-3-hydroxy-5-methylindolin-2-one (Table 3, entry 2)

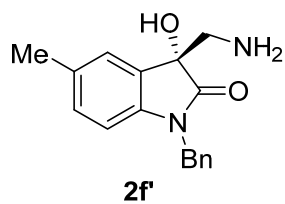

Chiralpak OD-H column, hexane/EtOH (7:3), flow rate 1.0 mL/min

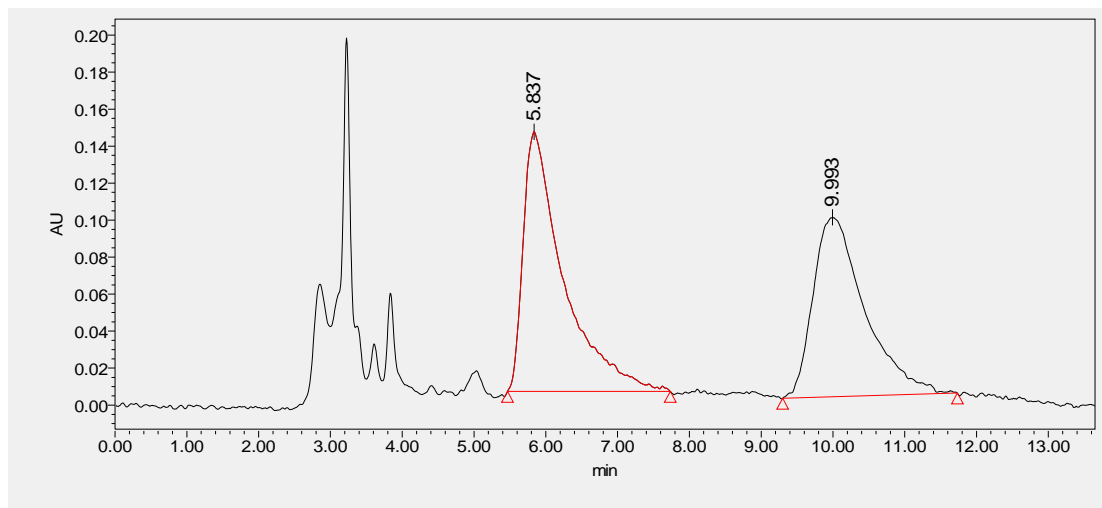

|   | Retention time | Area    | % Area | Height | Integral type |
|---|----------------|---------|--------|--------|---------------|
| 1 | 5.837          | 5436947 | 52.86  | 140415 | bb            |
| 2 | 9.993          | 4848747 | 47.14  | 96976  | bb            |

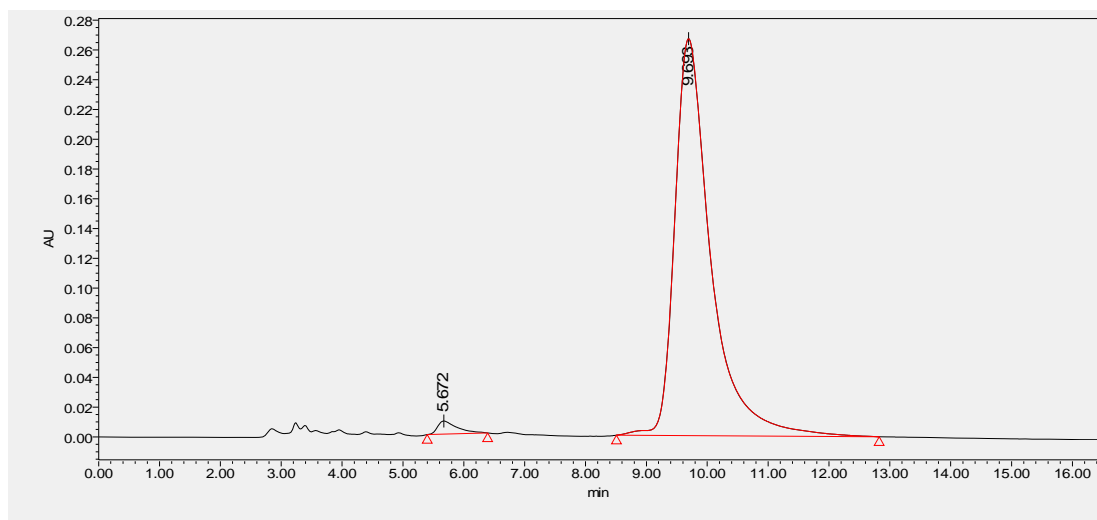

|   | Retention time | Area     | % Area | Height | Integral type |
|---|----------------|----------|--------|--------|---------------|
| 1 | 5.672          | 196249   | 1.75   | 8806   | bb            |
| 2 | 9.693          | 10989674 | 98.25  | 266698 | bb            |

(R)-3-(aminomethyl)-1-benzyl-3-hydroxy-5-methoxyindolin-2-one (Table 3, entry 3)

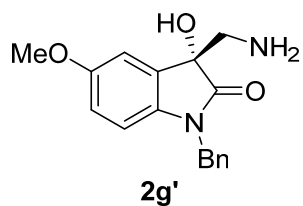

Chiralpak OD-H column, hexane/EtOH (7:3), flow rate 1.0 mL/min

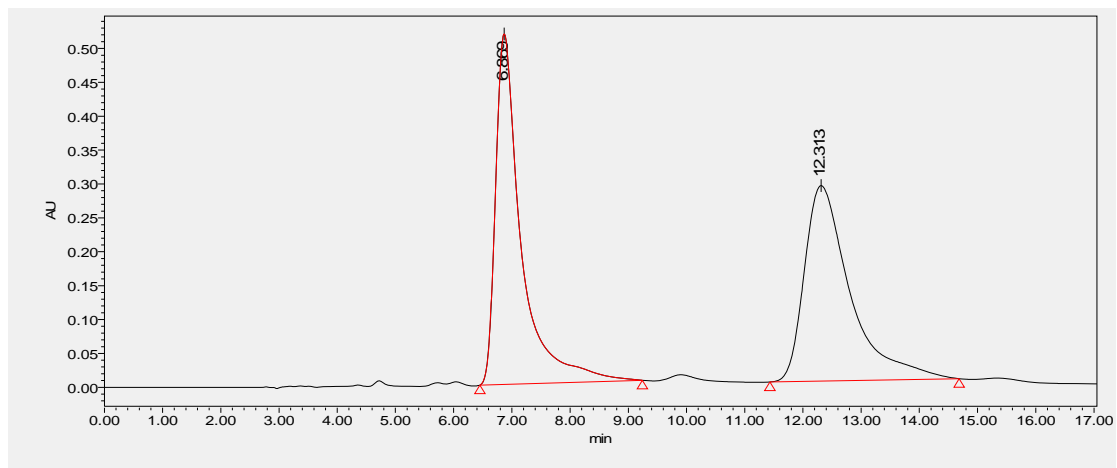

|   | Retention time | Area     | % Area | Height | Integral type |
|---|----------------|----------|--------|--------|---------------|
| 1 | 6.869          | 15830031 | 50.11  | 517196 | bb            |
| 2 | 12.313         | 15762766 | 49.89  | 288453 | bb            |

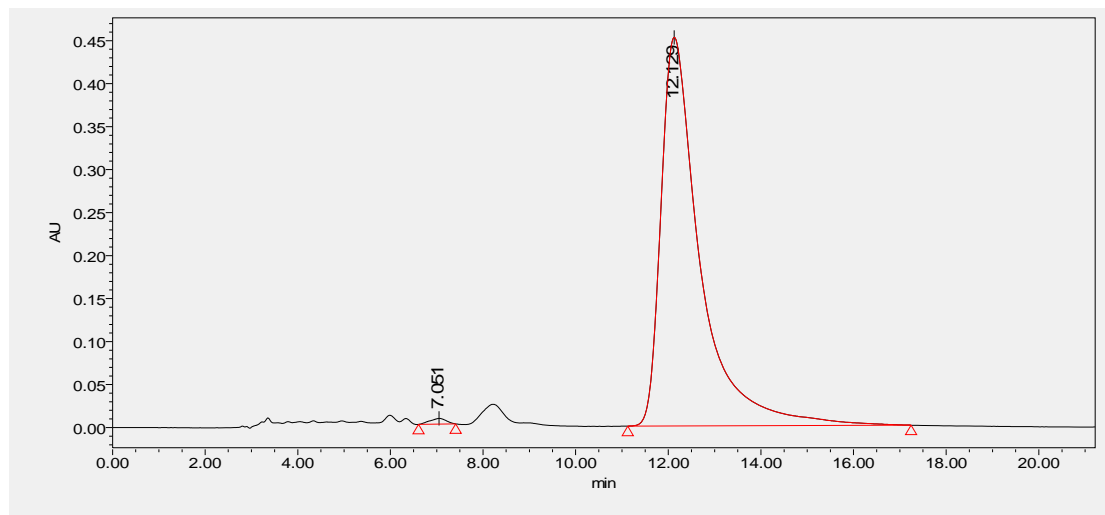

|   | Retention time | Area     | % Area | Height | Integral type |
|---|----------------|----------|--------|--------|---------------|
| 1 | 7.051          | 161632   | 0.60   | 6631   | bb            |
| 2 | 12.129         | 26612364 | 99.40  | 451971 | bb            |

(*R*)-3-(aminomethyl)-1-benzyl-6-chloro-3-hydroxyindolin-2-one (Table 3, entry 4)

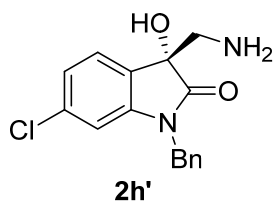

Chiralpak OD-H column, hexane/EtOH (7:3), flow rate 1.0 mL/min

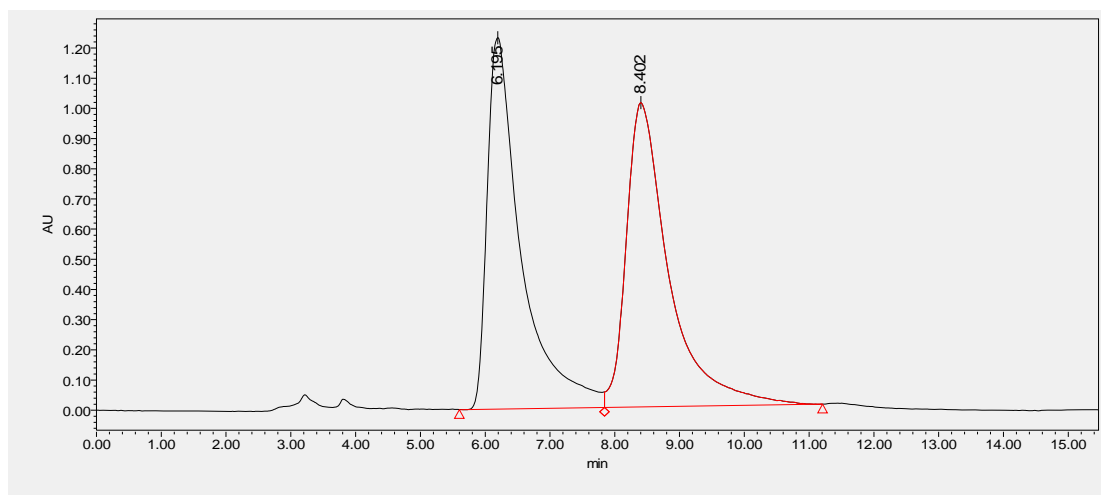

|   | Retention time | Area     | % Area | Height  | Integral type |
|---|----------------|----------|--------|---------|---------------|
| 1 | 6.195          | 44617719 | 49.29  | 1230356 | bv            |
| 2 | 8.402          | 45906199 | 50.71  | 1007696 | vb            |

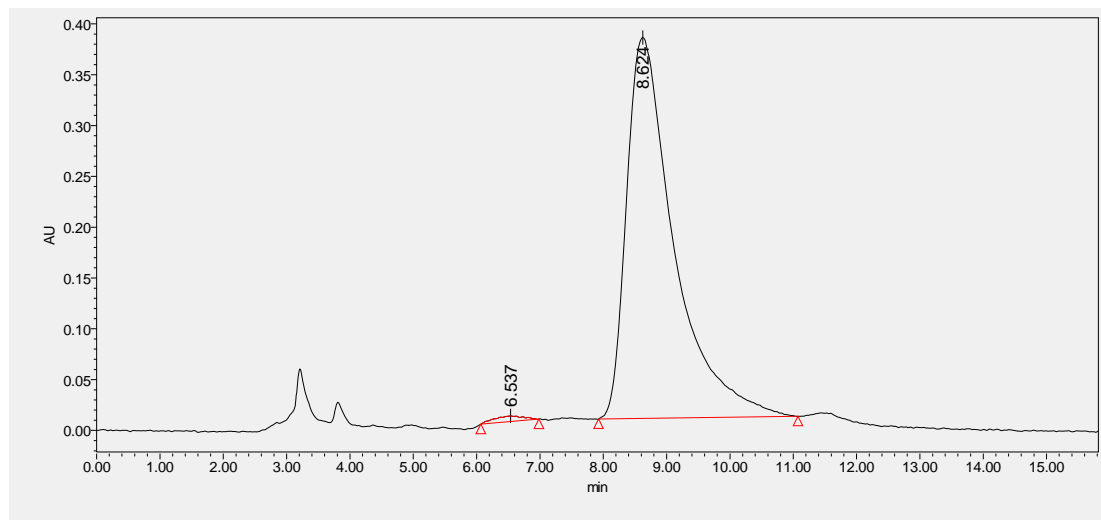

|   | Retention time | Area     | % Area | Height | Integral type |
|---|----------------|----------|--------|--------|---------------|
| 1 | 6.537          | 183726   | 0.94   | 5635   | bb            |
| 2 | 8.624          | 19461183 | 99.06  | 374773 | bb            |

(*R*)-3-(aminomethyl)-1-benzyl-6-bromo-3-hydroxyindolin-2-one (Table 3, entry 5)

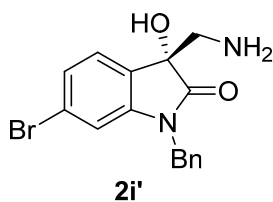

Chiralpak OD-H column, hexane/EtOH (7:3), flow rate 1.0 mL/min

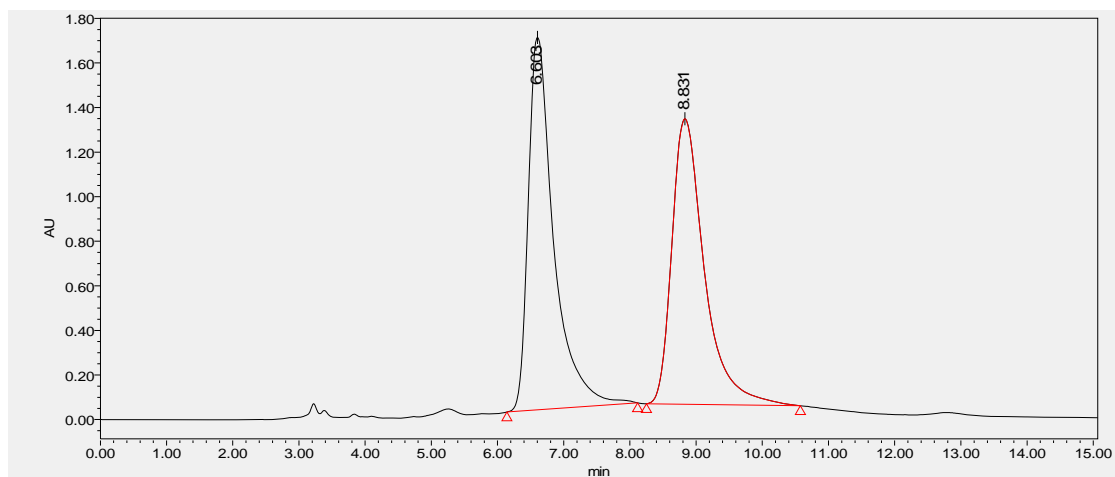

|   | Retention time | Area     | % Area | Height  | Integral type |
|---|----------------|----------|--------|---------|---------------|
| 1 | 6.603          | 44677878 | 50.56  | 1670989 | bb            |
| 2 | 8.831          | 43680220 | 49.44  | 1281028 | bb            |

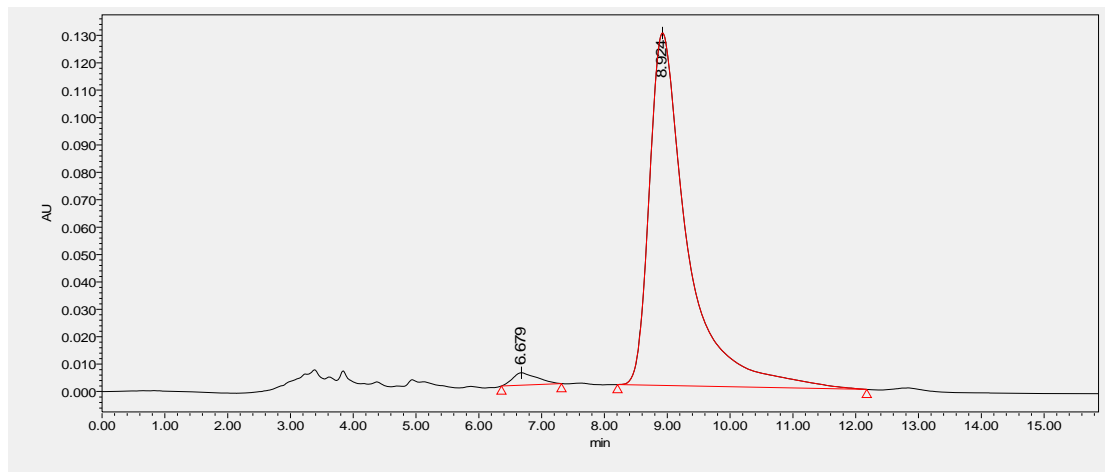

|   | Retention time | Area    | % Area | Height | Integral type |
|---|----------------|---------|--------|--------|---------------|
| 1 | 6.679          | 121785  | 2.20   | 4540   | bb            |
| 2 | 8.924          | 5416442 | 97.80  | 128652 | bb            |

(*R*)-3-(aminomethyl)-1-benzyl-7-chloro-3-hydroxyindolin-2-one (Table 3, entry 6)

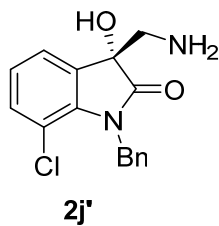

Chiralpak OD-H column, hexane/EtOH (7:3), flow rate 1.0 mL/min

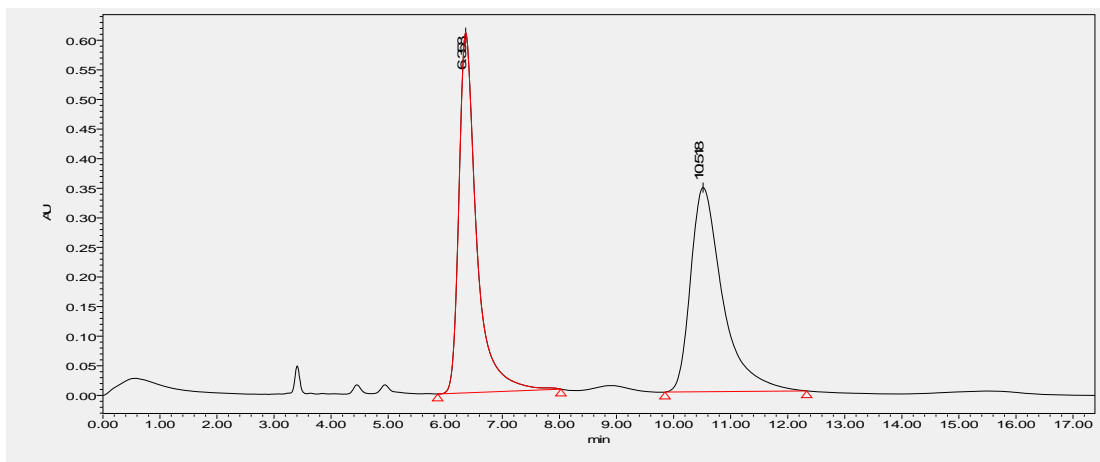

|   | Retention time | Area     | % Area | Height | Integral type |
|---|----------------|----------|--------|--------|---------------|
| 1 | 6.358          | 13111383 | 49.38  | 608499 | bb            |
| 2 | 10.518         | 13441431 | 50.62  | 345053 | bb            |

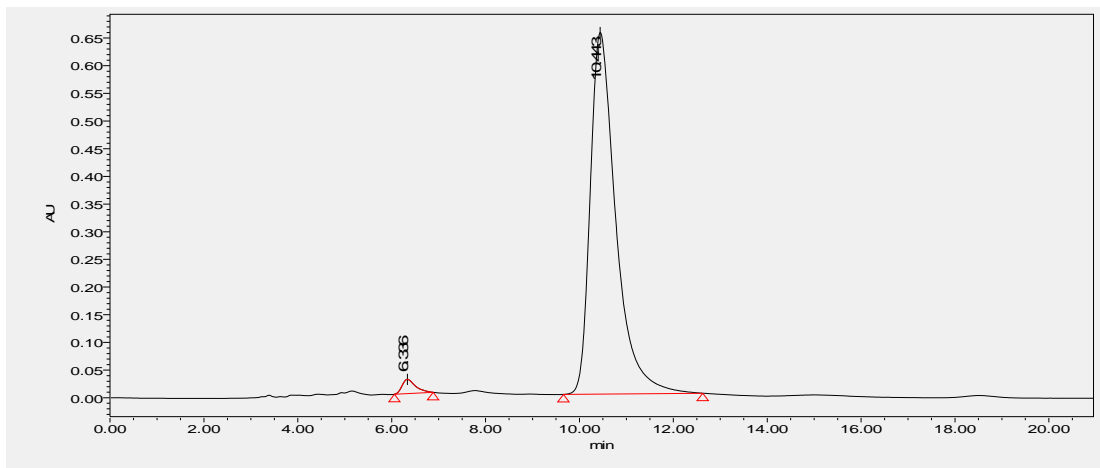

|   | Retention time | Area     | % Area | Height | Integral type |
|---|----------------|----------|--------|--------|---------------|
| 1 | 6.336          | 513935   | 2.03   | 25822  | bb            |
| 2 | 10.443         | 24788016 | 97.97  | 653245 | bb            |

(*R*)-3-(aminomethyl)-3-hydroxy-1-(4-methoxybenzyl)indolin-2-one (Table 3, entry 7)

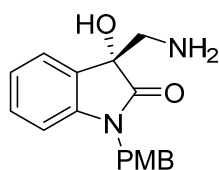

**2p'**

Chiralpak OD-H column, hexane/EtOH (7:3), flow rate 1.0 mL/min

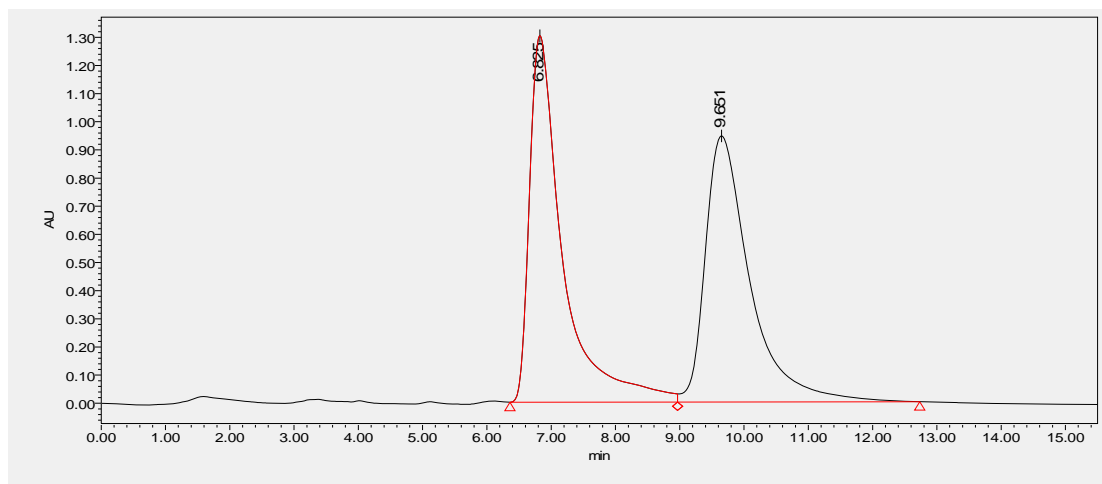

|   | Retention time | Area     | % Area | Height  | Integral type |
|---|----------------|----------|--------|---------|---------------|
| 1 | 6.825          | 46648109 | 50.59  | 1301998 | bv            |
| 2 | 9.651          | 45556671 | 49.41  | 945292  | vb            |

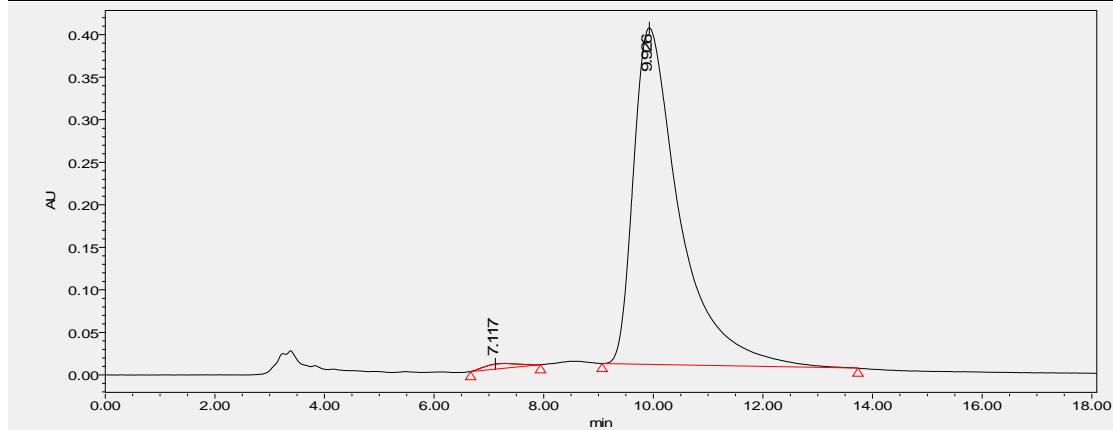

|   | Retention time | Area     | % Area | Height | Integral type |
|---|----------------|----------|--------|--------|---------------|
| 1 | 7.117          | 250256   | 1.07   | 6021   | bb            |
| 2 | 9.926          | 23116760 | 98.93  | 395584 | bb            |

(*R*)-methyl ((1-benzyl-3-hydroxy-2-oxoindolin-3-yl)methyl)carbamodithioate (Scheme 2, **3**)

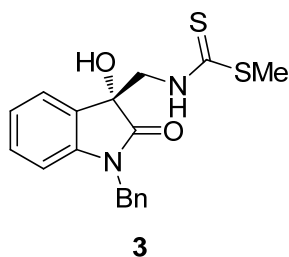

Chiralpak AS column, hexane/EtOH (8:2), flow rate 1.0 mL/min

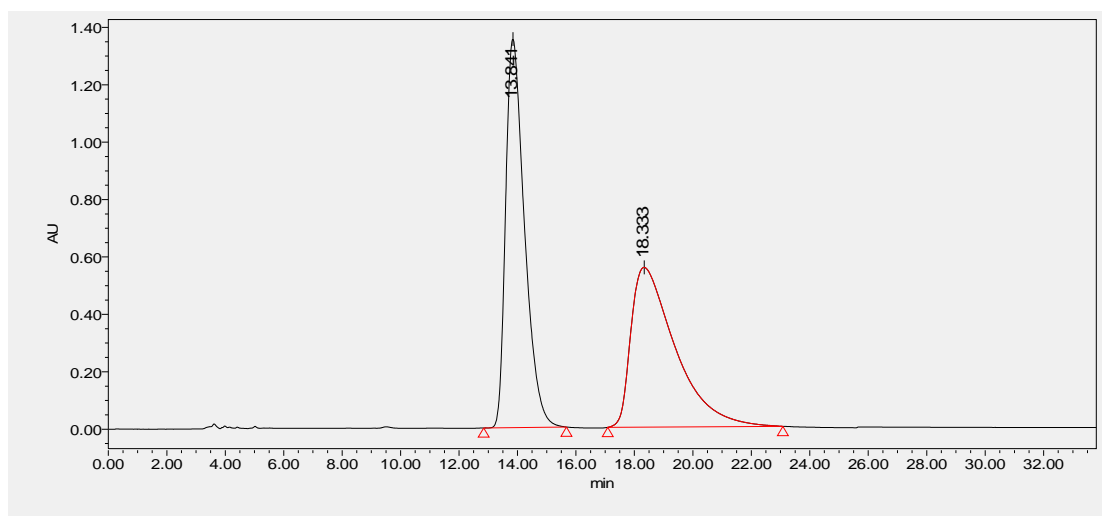

|   | Retention time | Area     | % Area | Height  | Integral type |
|---|----------------|----------|--------|---------|---------------|
| 1 | 13.841         | 60668556 | 50.80  | 1353628 | bb            |
| 2 | 18.333         | 58752826 | 49.20  | 556557  | bb            |

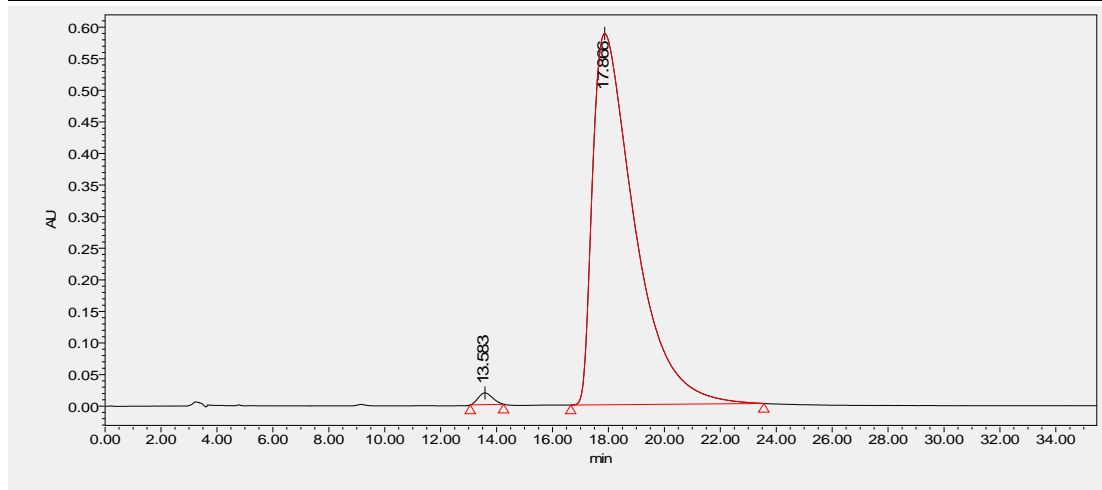

|   | Retention time | Area     | % Area | Height | Integral type |
|---|----------------|----------|--------|--------|---------------|
| 1 | 13.583         | 657222   | 1.06   | 18508  | bb            |
| 2 | 17.866         | 61222987 | 98.94  | 587755 | bb            |



(R)-1-benzyl-2'-(methylthio)-4'H-spiro[indoline-3,5'-thiazol]-2-one (Scheme 2, 4)

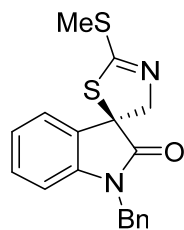

4

Chiralpak AD column, hexane/EtOH (8:2), flow rate 1.0 mL/min

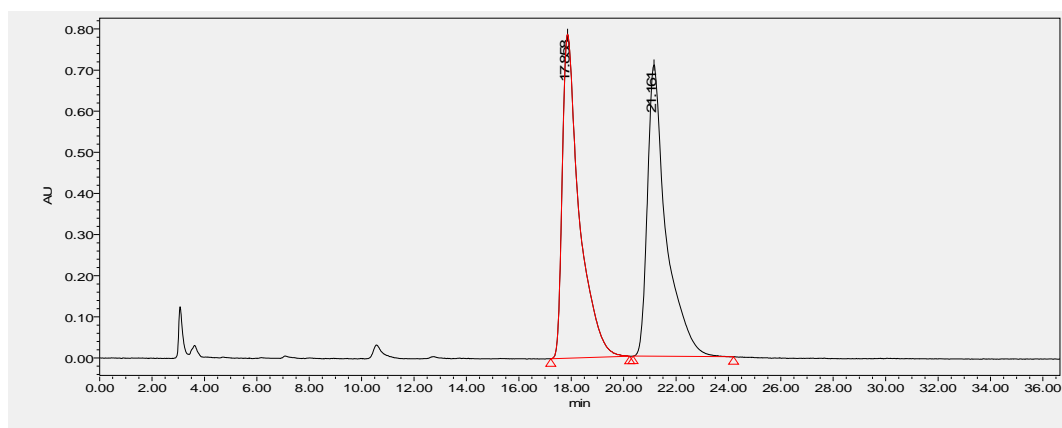

|   | Retention time | Area     | % Area | Height | Integral type |
|---|----------------|----------|--------|--------|---------------|
| 1 | 17.858         | 35387474 | 50.32  | 787462 | bb            |
| 2 | 21.161         | 34941844 | 49.68  | 708519 | bb            |

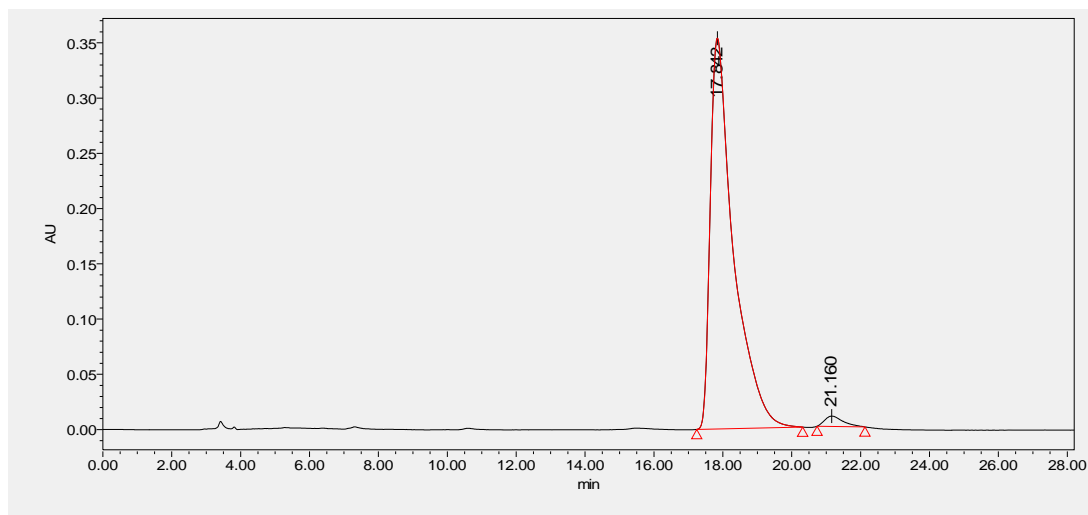

|   | Retention time | Area     | % Area | Height | Integral type |
|---|----------------|----------|--------|--------|---------------|
| 1 | 17.842         | 16509374 | 97.94  | 353649 | bb            |
| 2 | 21.160         | 347475   | 2.06   | 9335   | bb            |

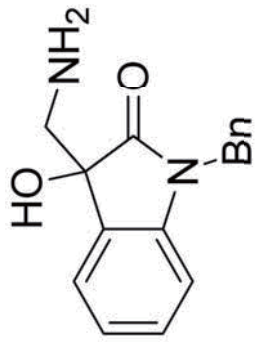

2a

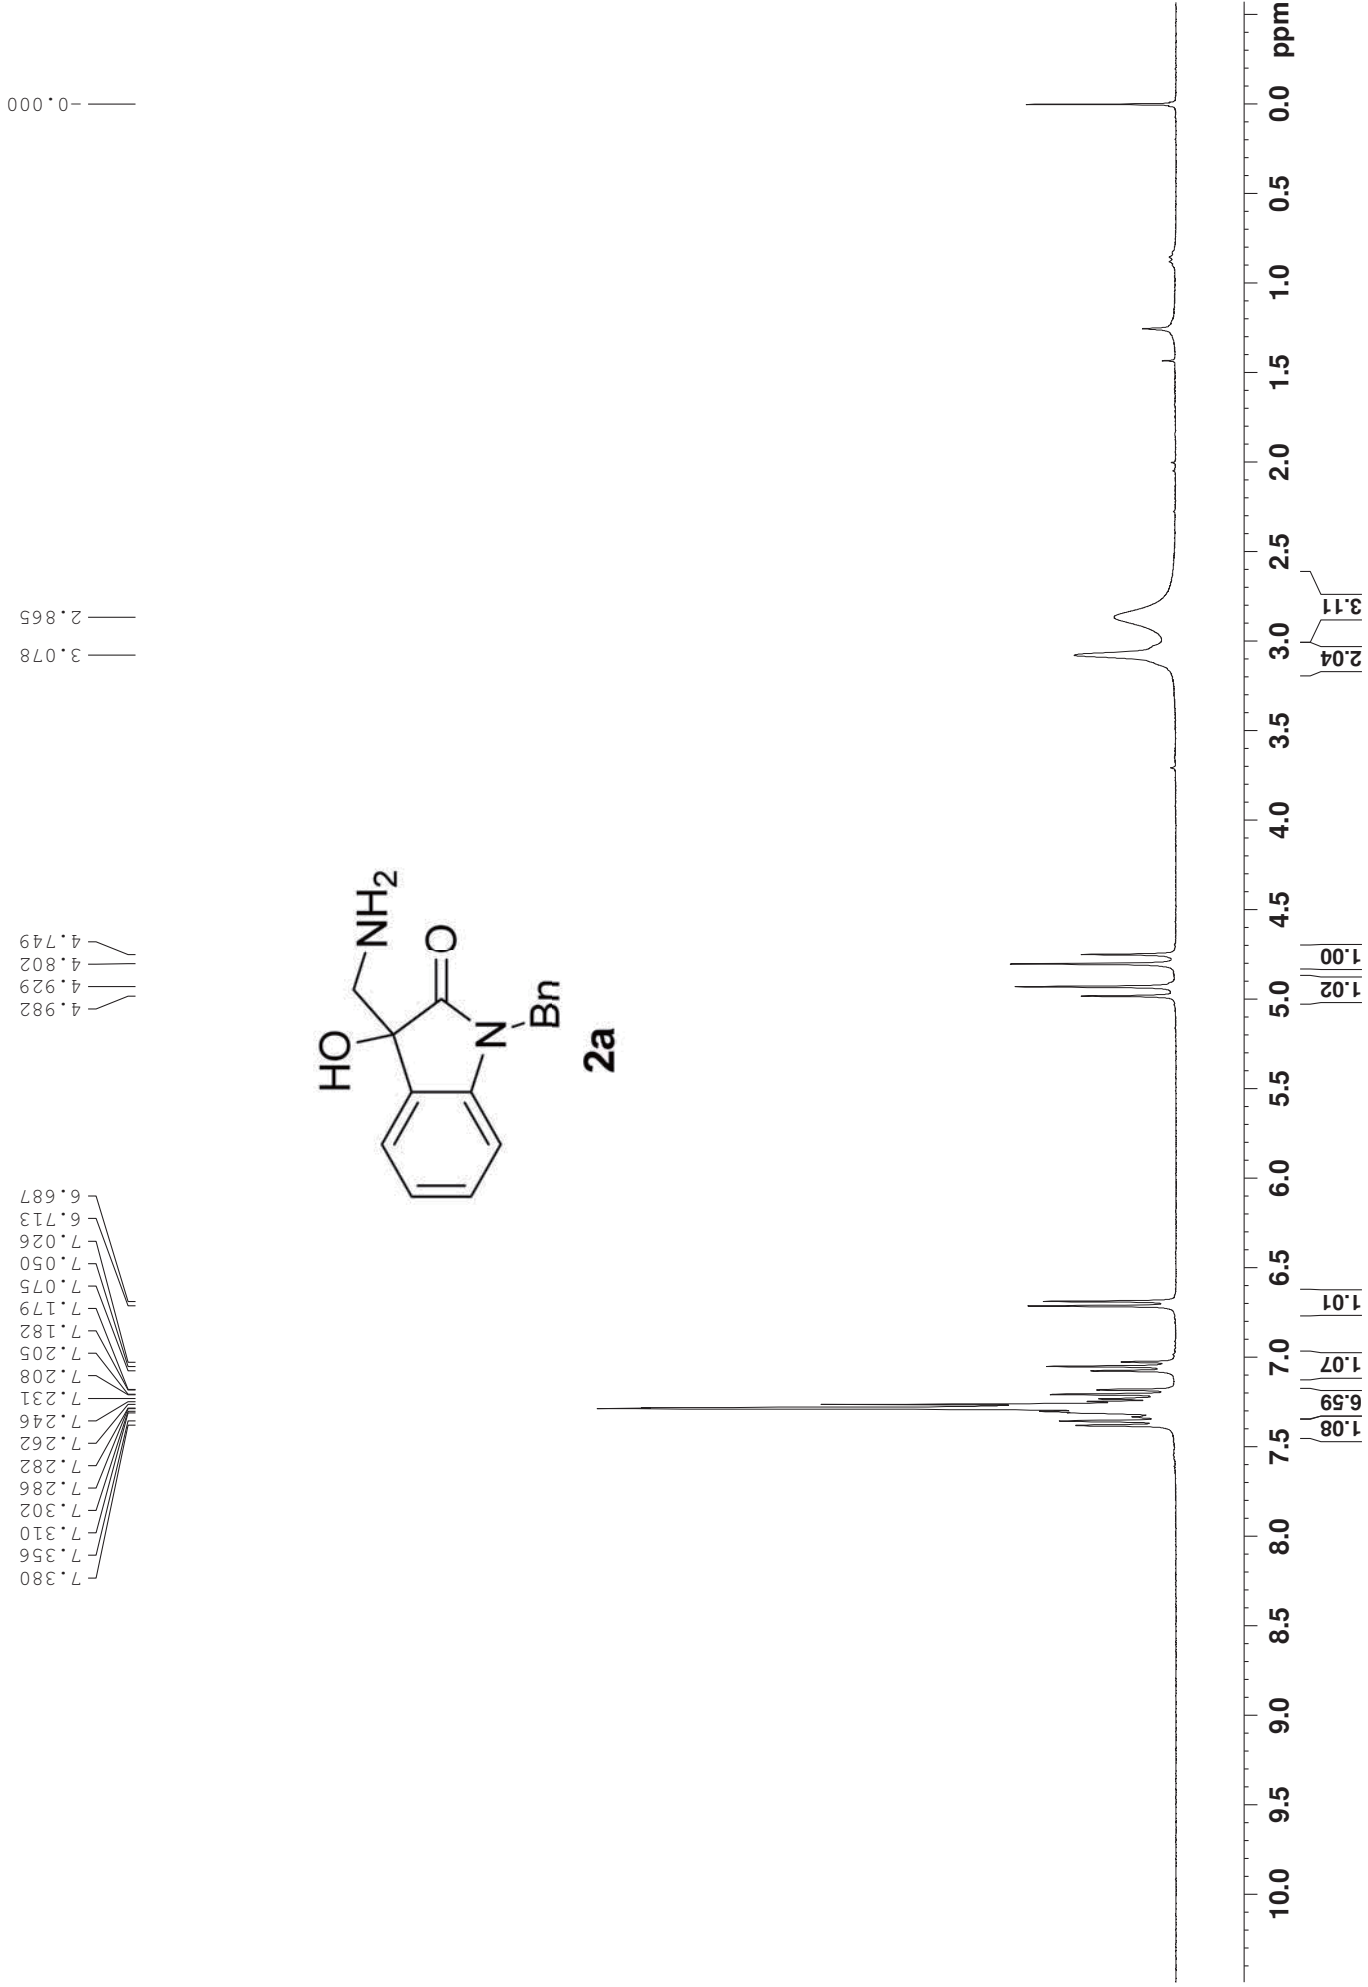

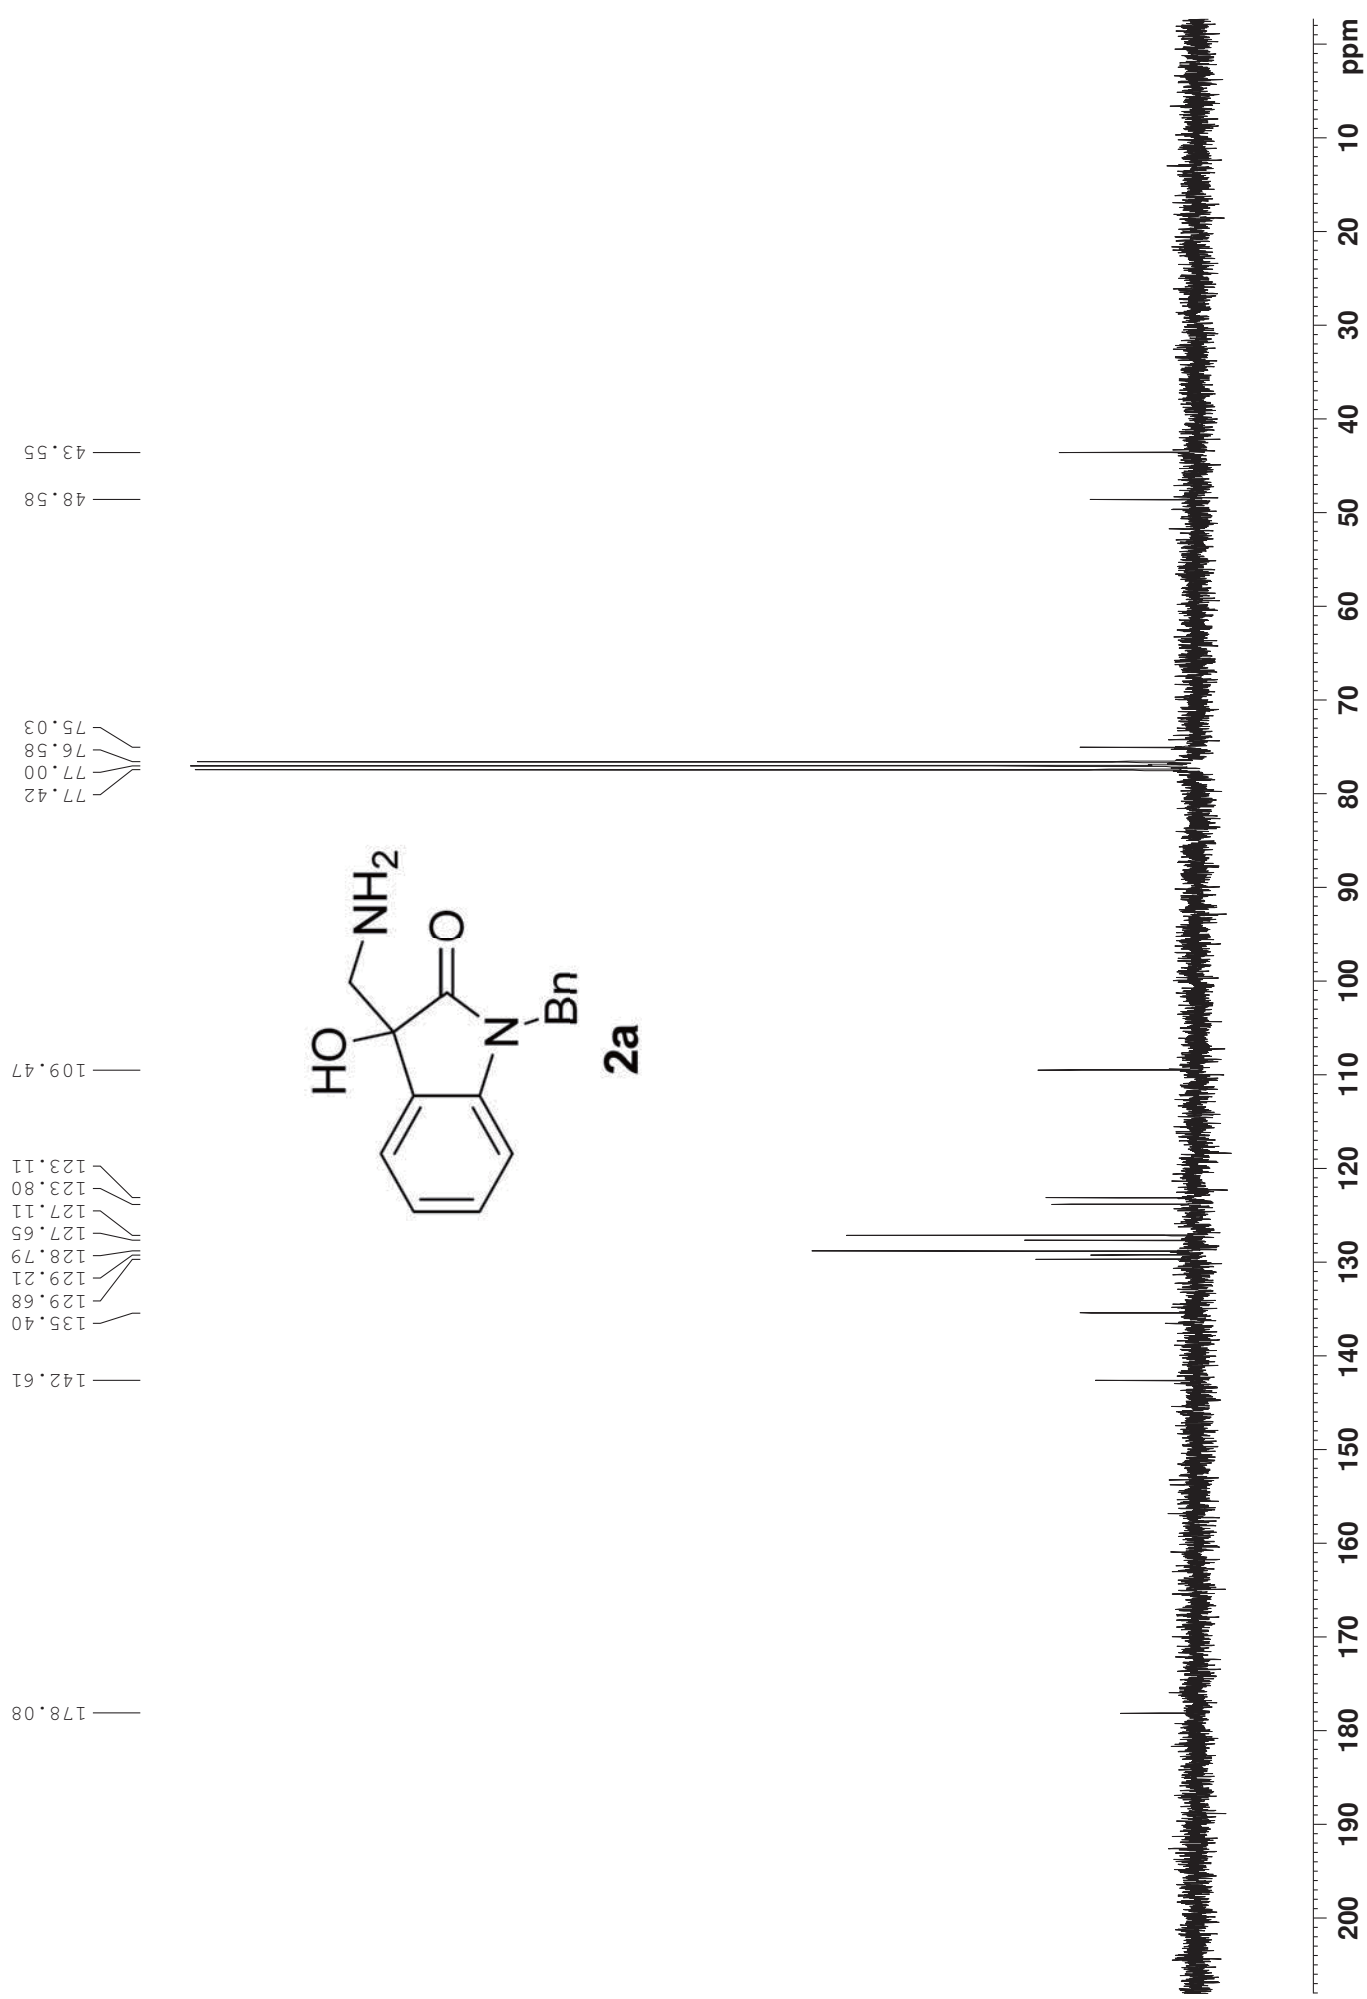

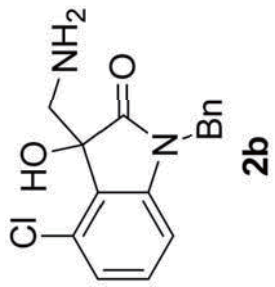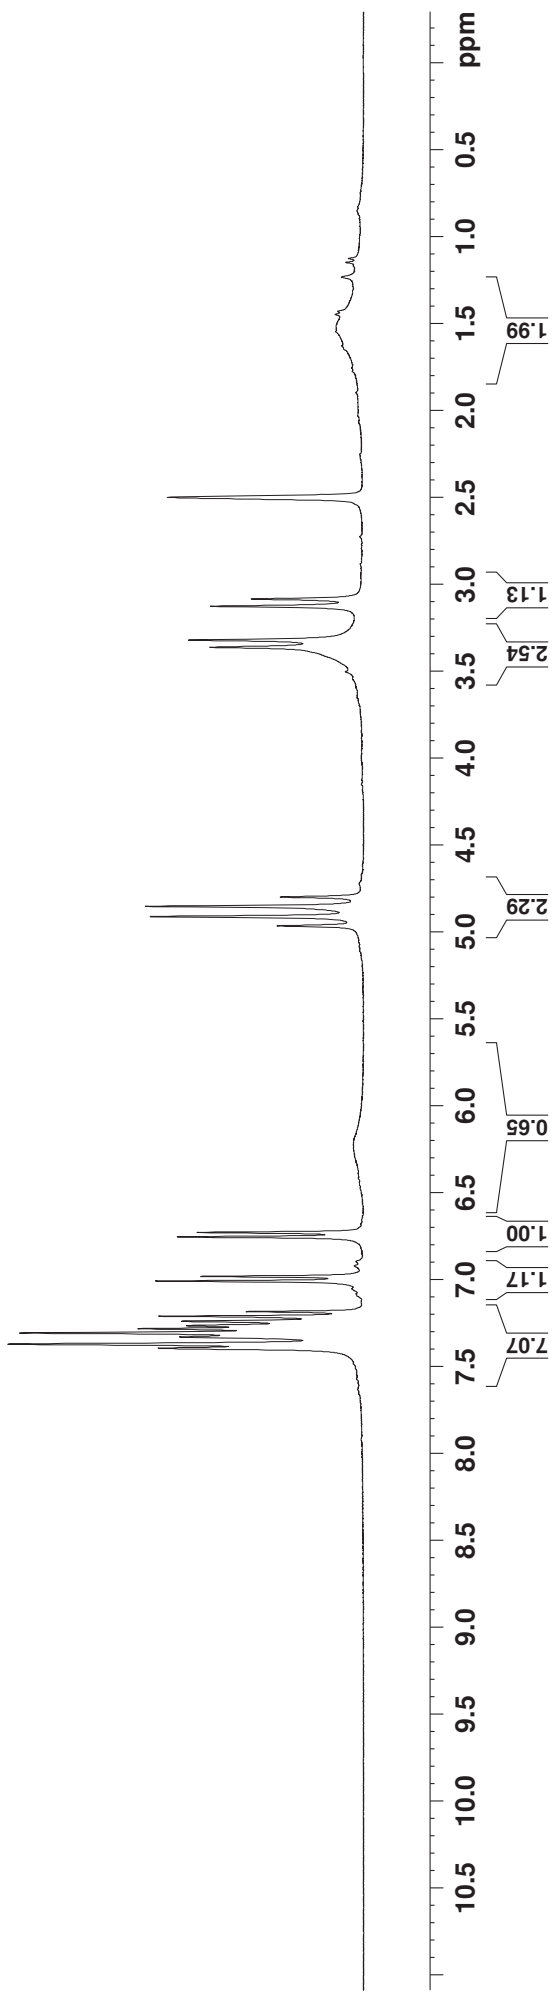

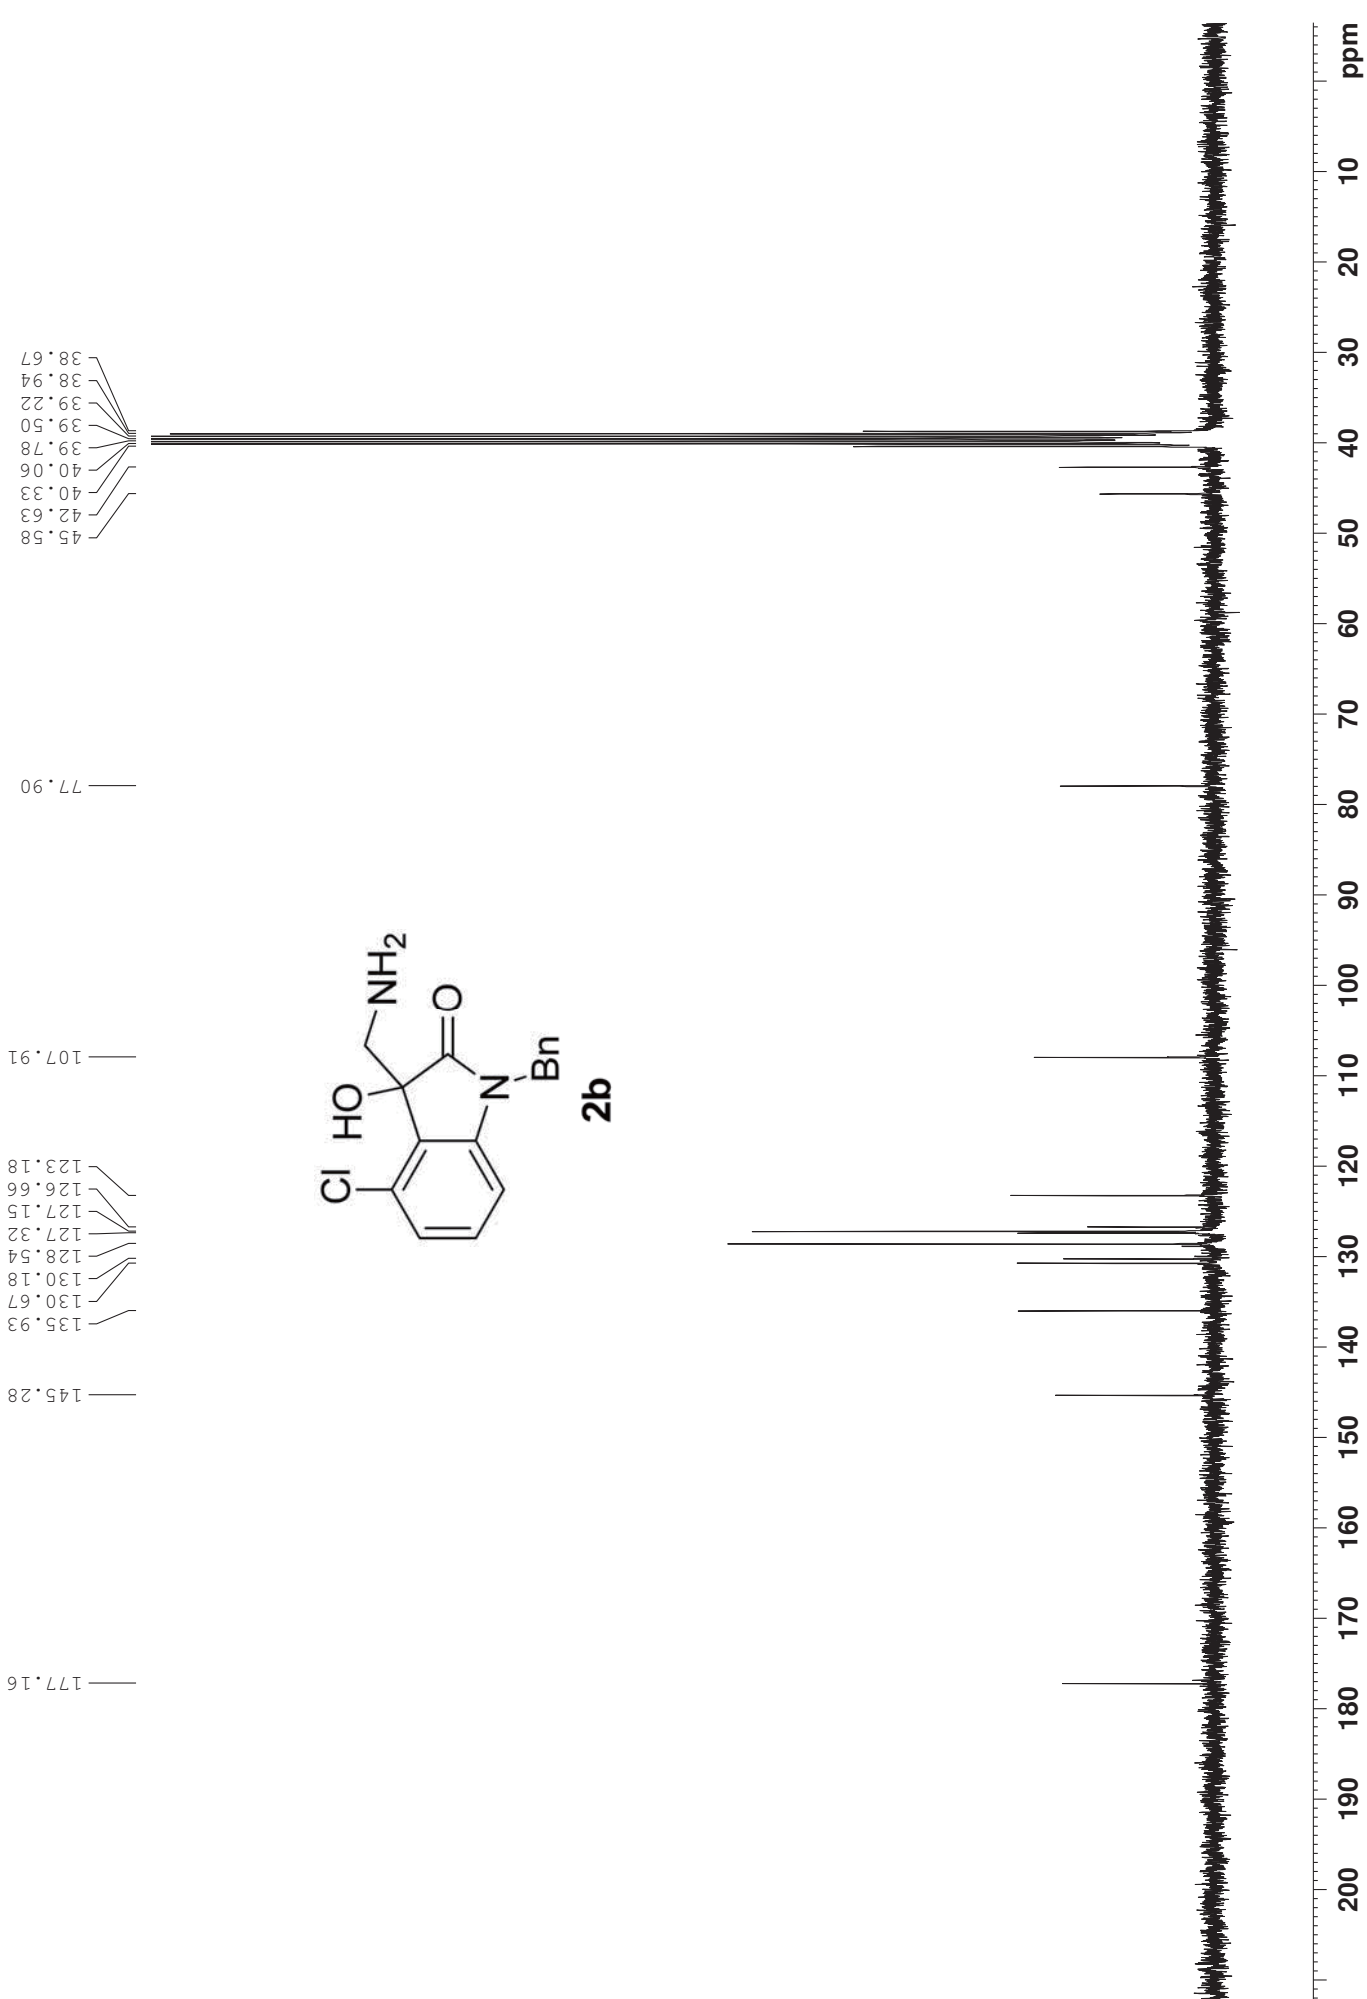

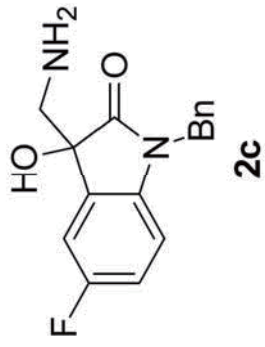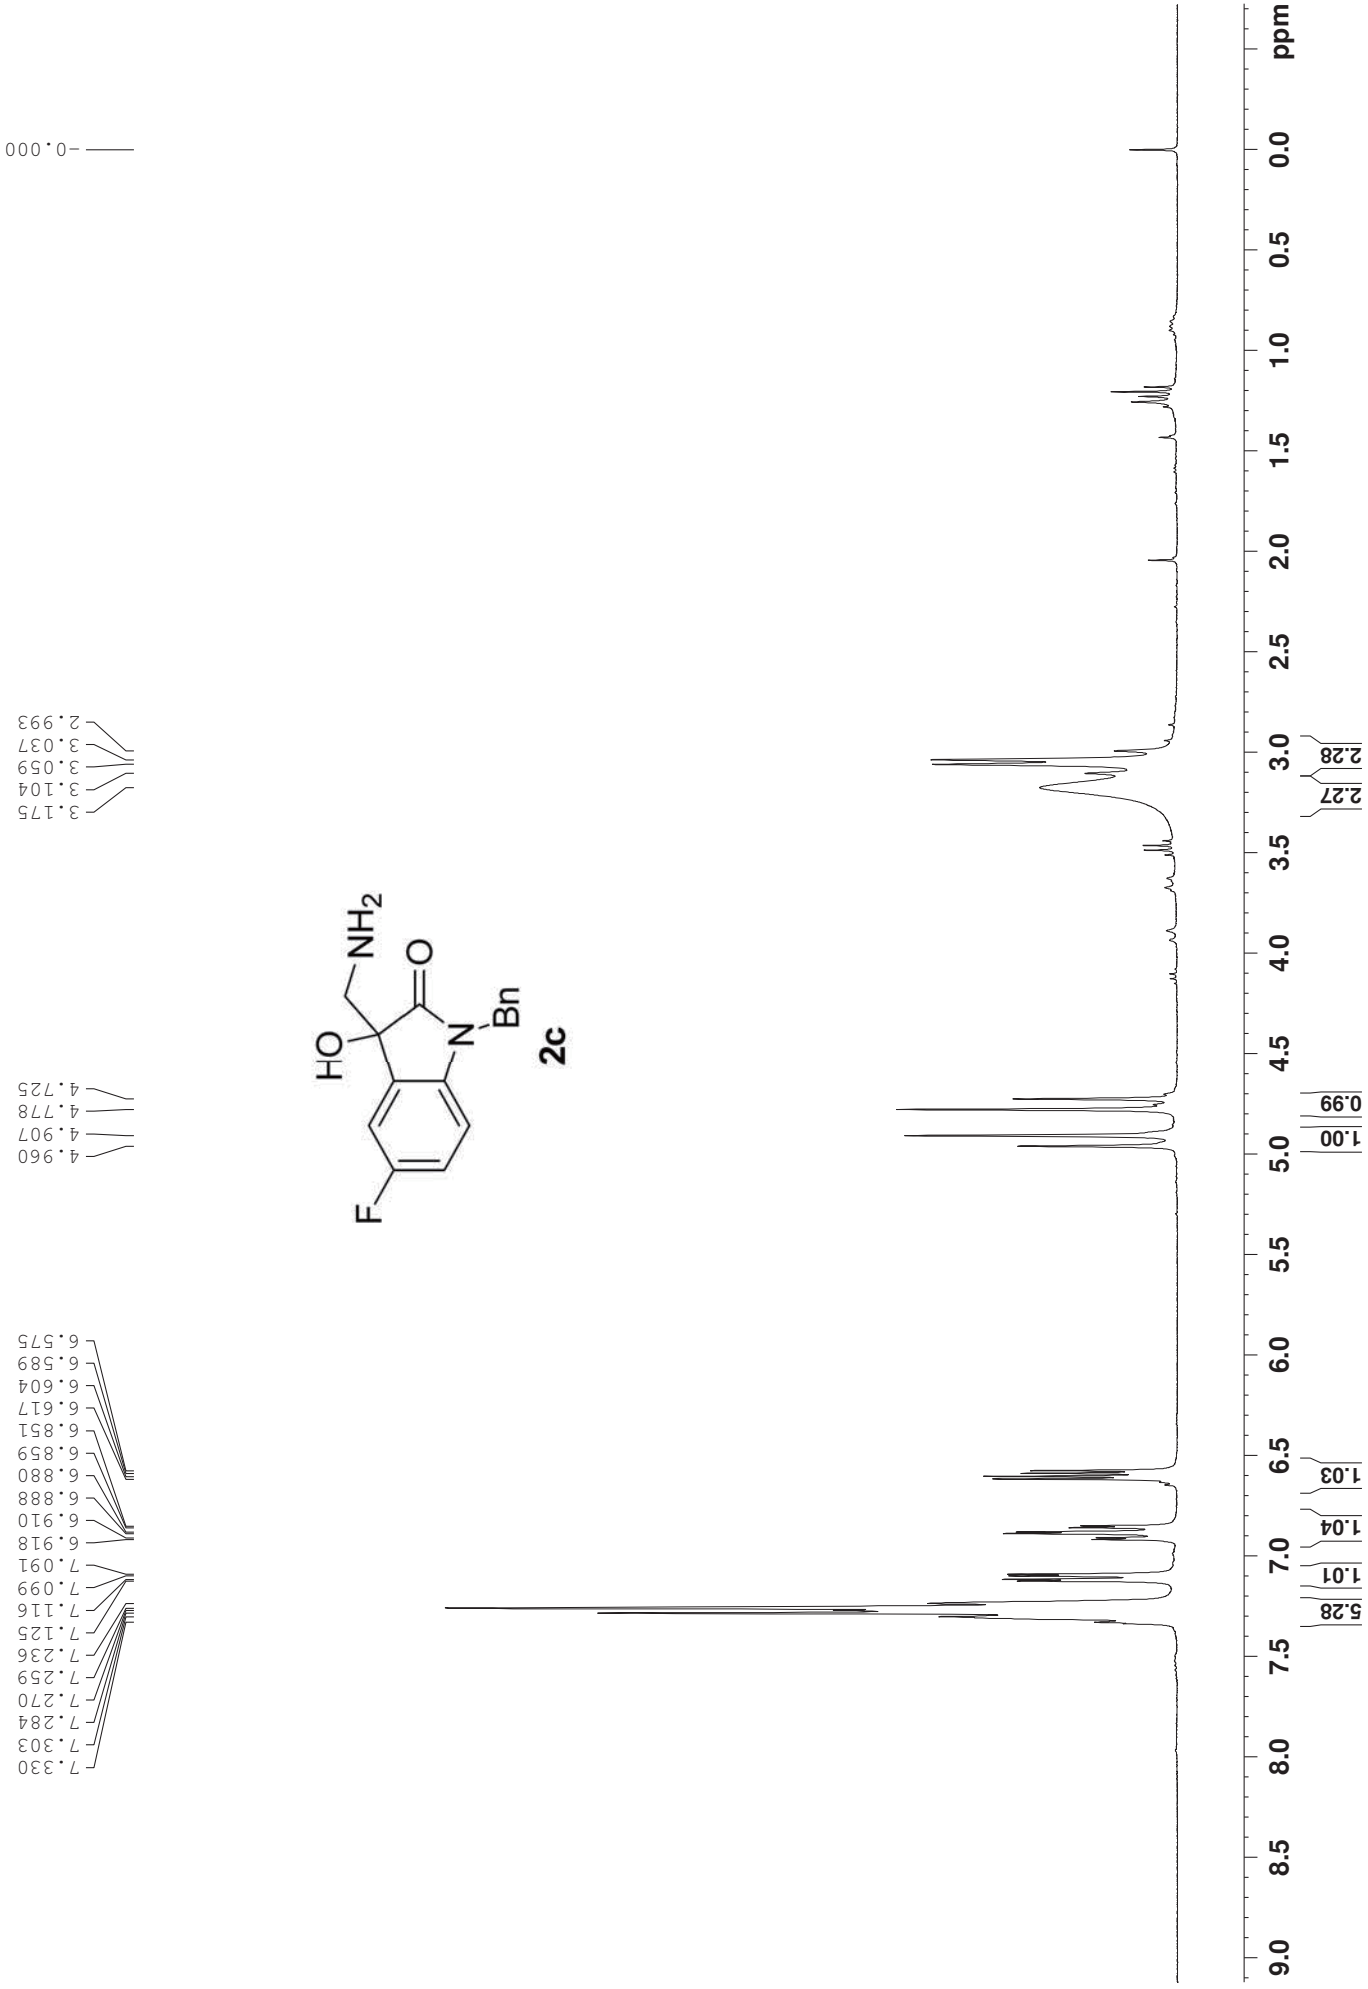

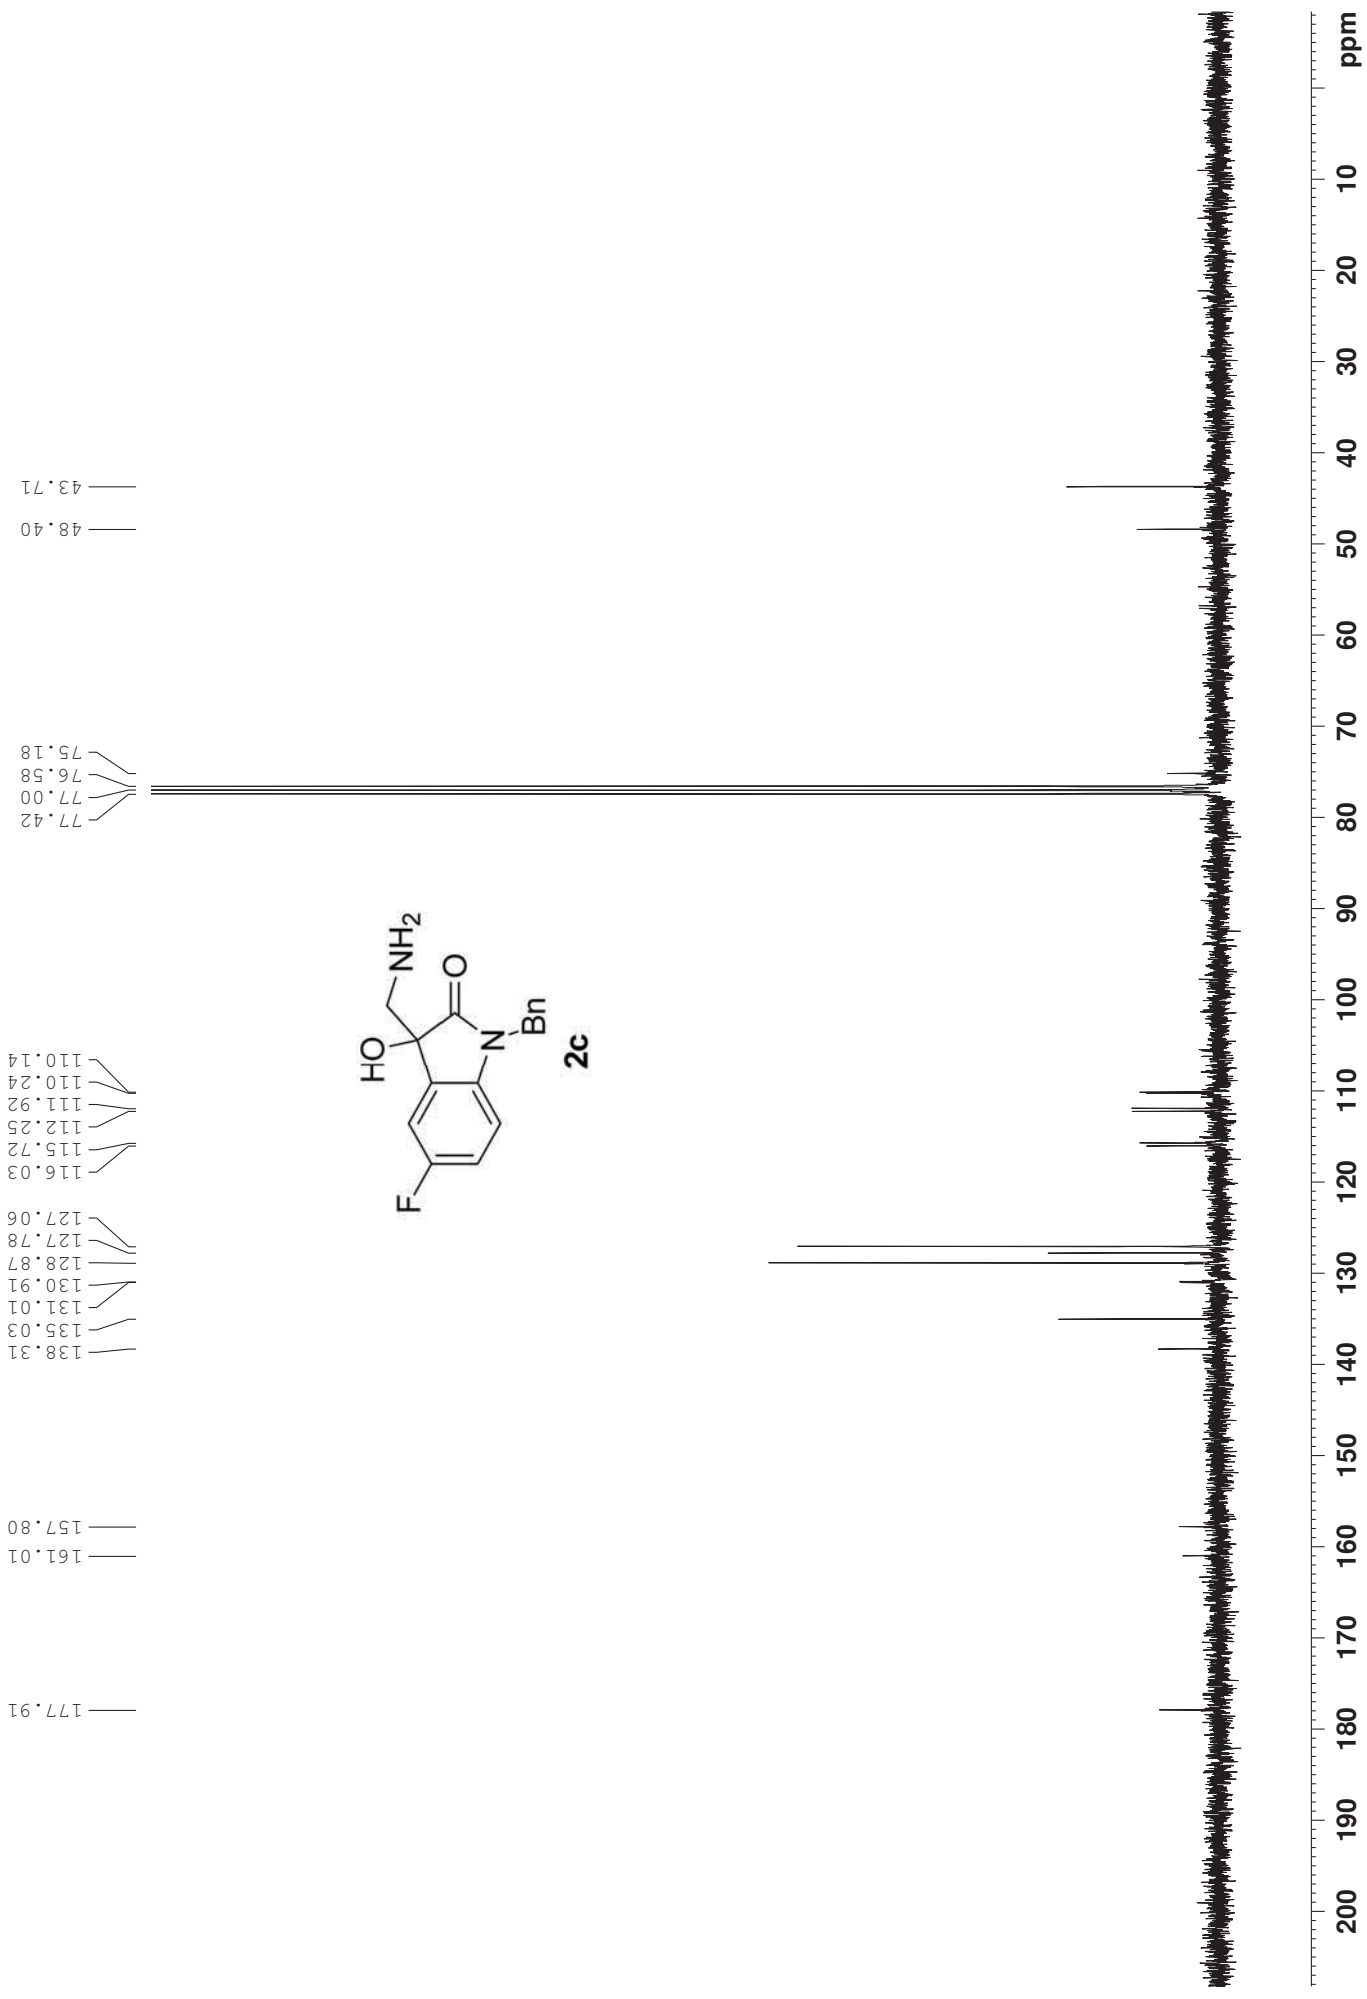

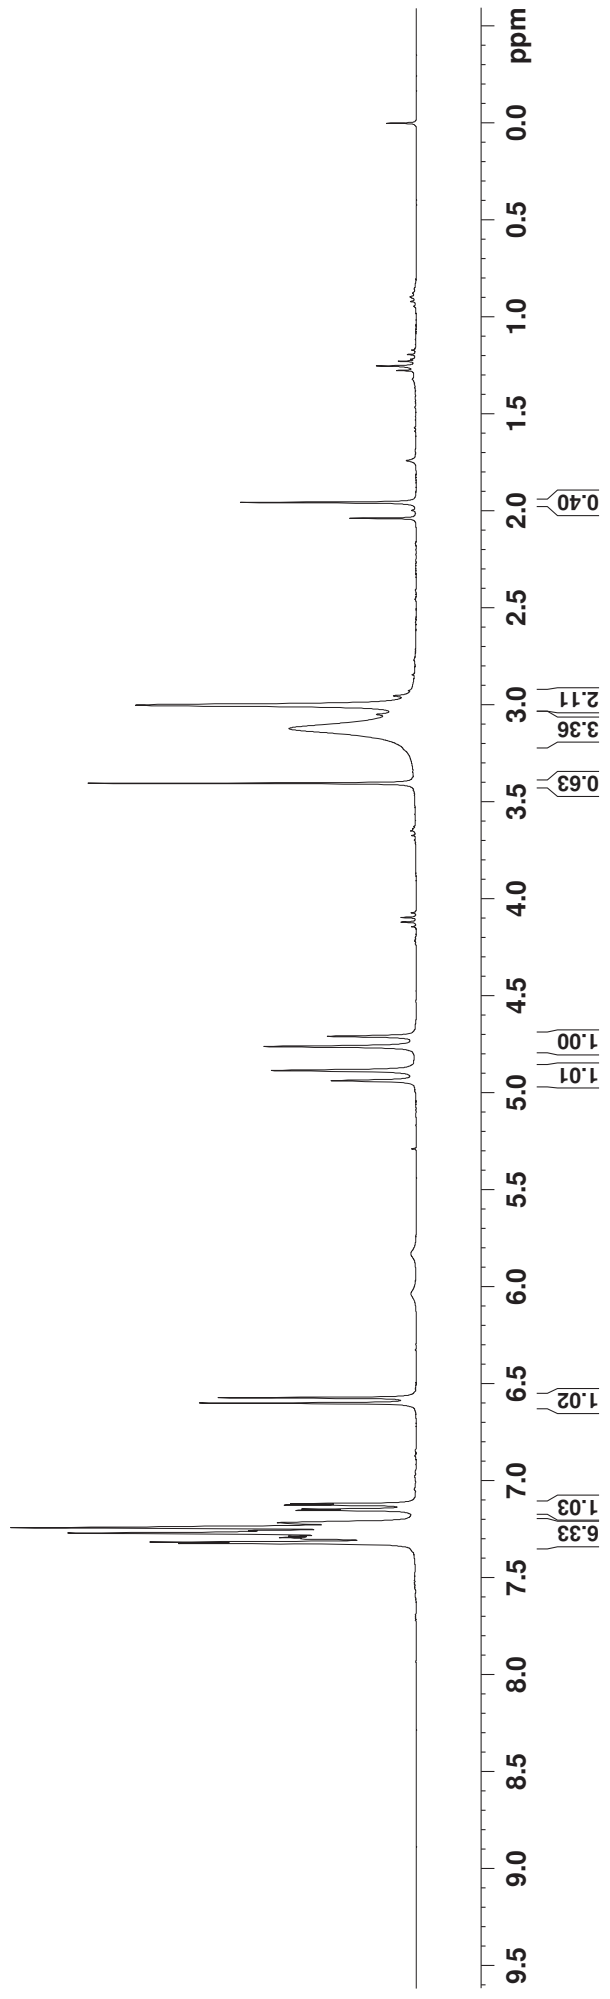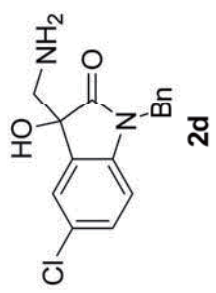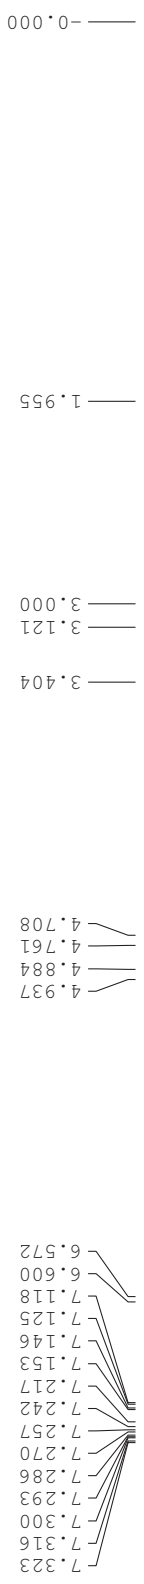



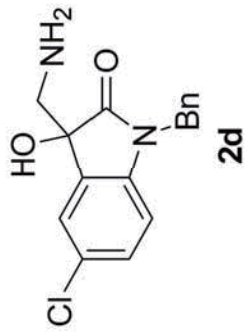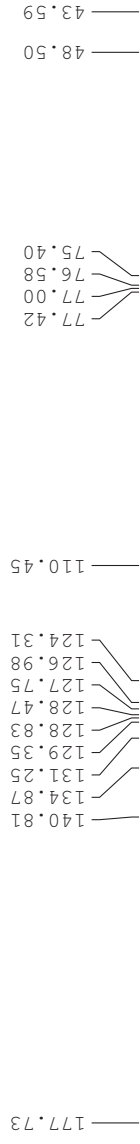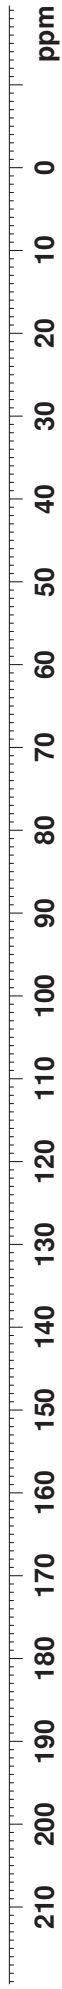

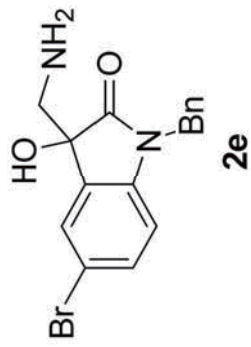

3.390  
3.372  
3.360  
3.167  
3.025  
2.982  
2.913  
2.870  
2.505  
2.500  
2.495

4.946  
4.893  
4.841  
4.788

7.544  
7.537  
7.417  
7.410  
7.389  
7.382  
7.357  
7.333  
7.311  
7.285  
7.273  
7.266  
7.257  
7.245  
6.772  
6.744

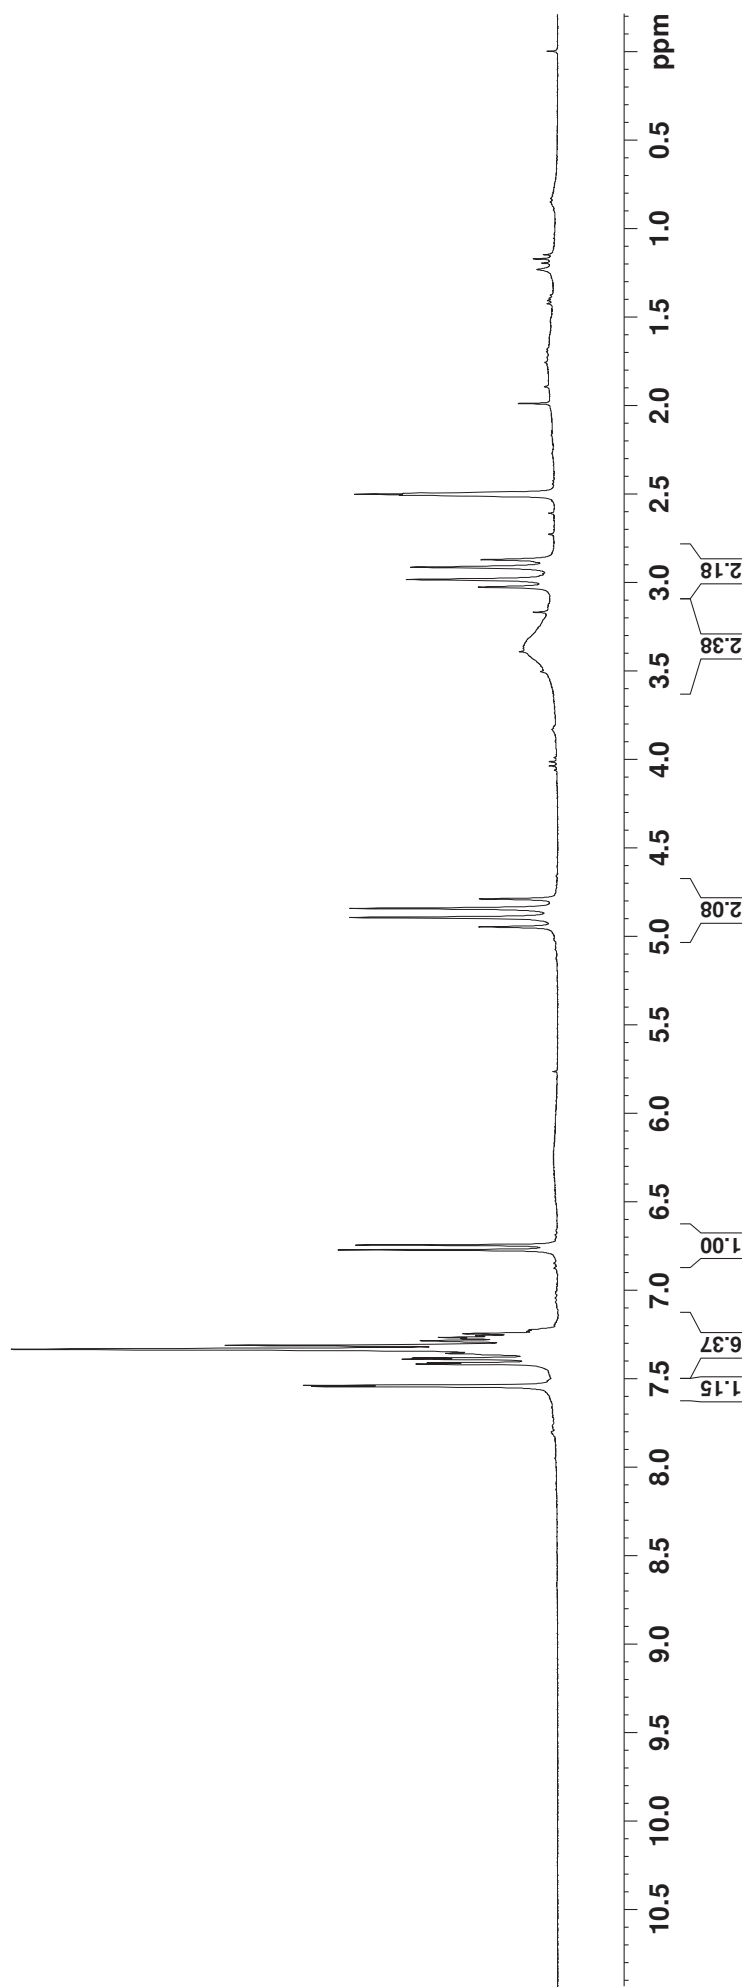

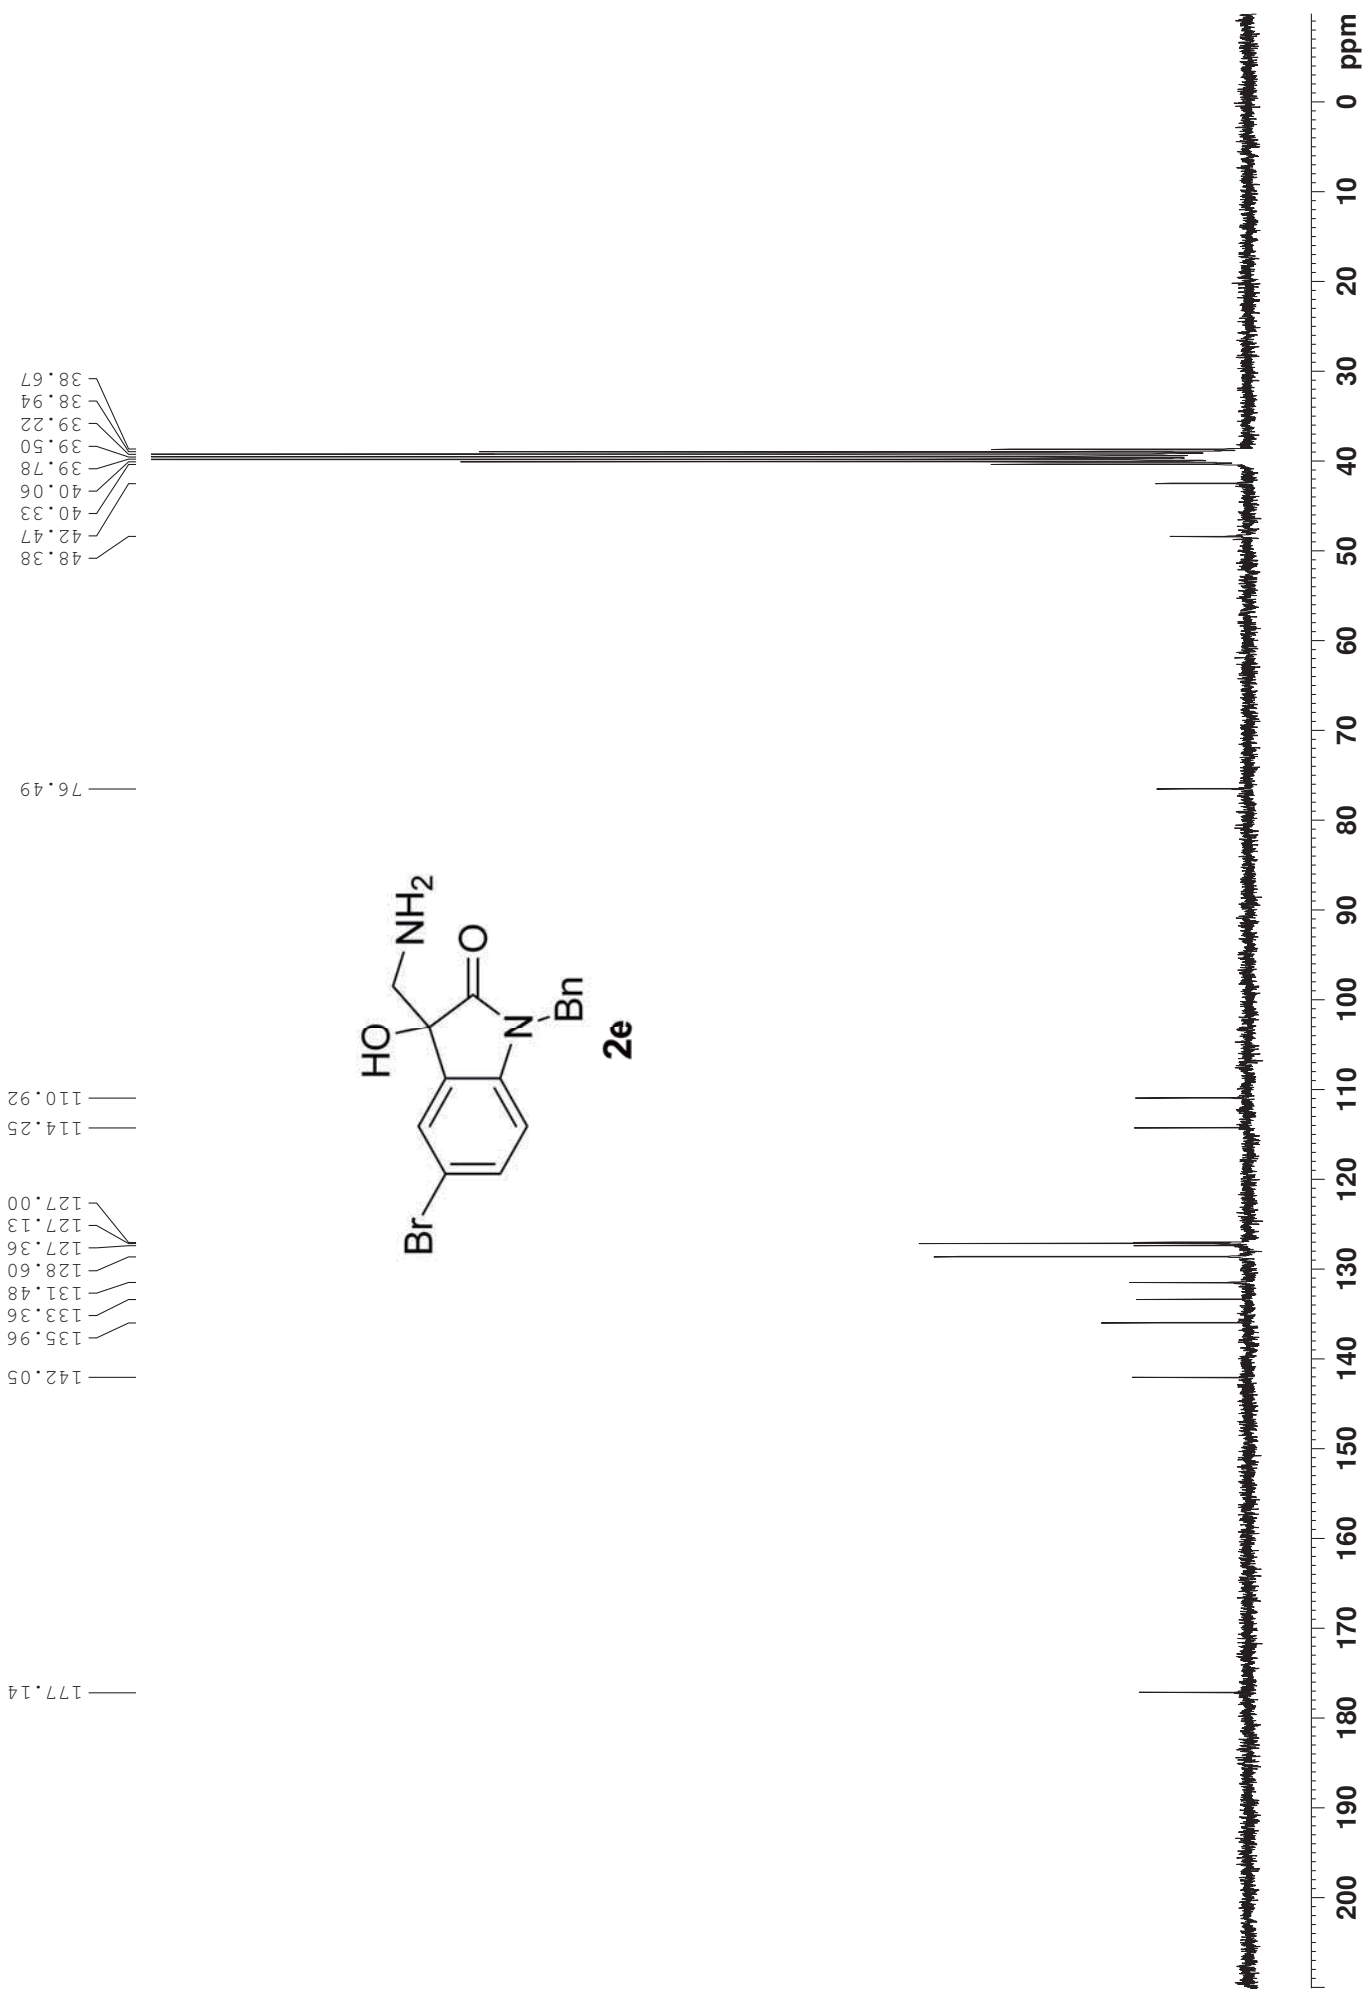

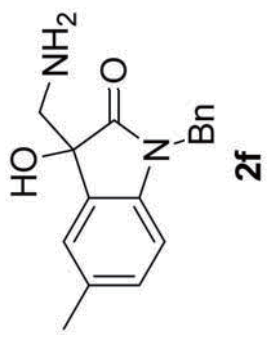

3.454  
3.389  
3.285  
3.229  
3.200  
3.187  
2.966  
2.923  
2.897  
2.854  
2.506  
2.500  
2.494  
2.252

4.915  
4.862  
4.817  
4.764

7.358  
7.352  
7.327  
7.305  
7.279  
7.265  
7.258  
7.249  
7.236  
7.206  
7.016  
6.990  
6.689  
6.662

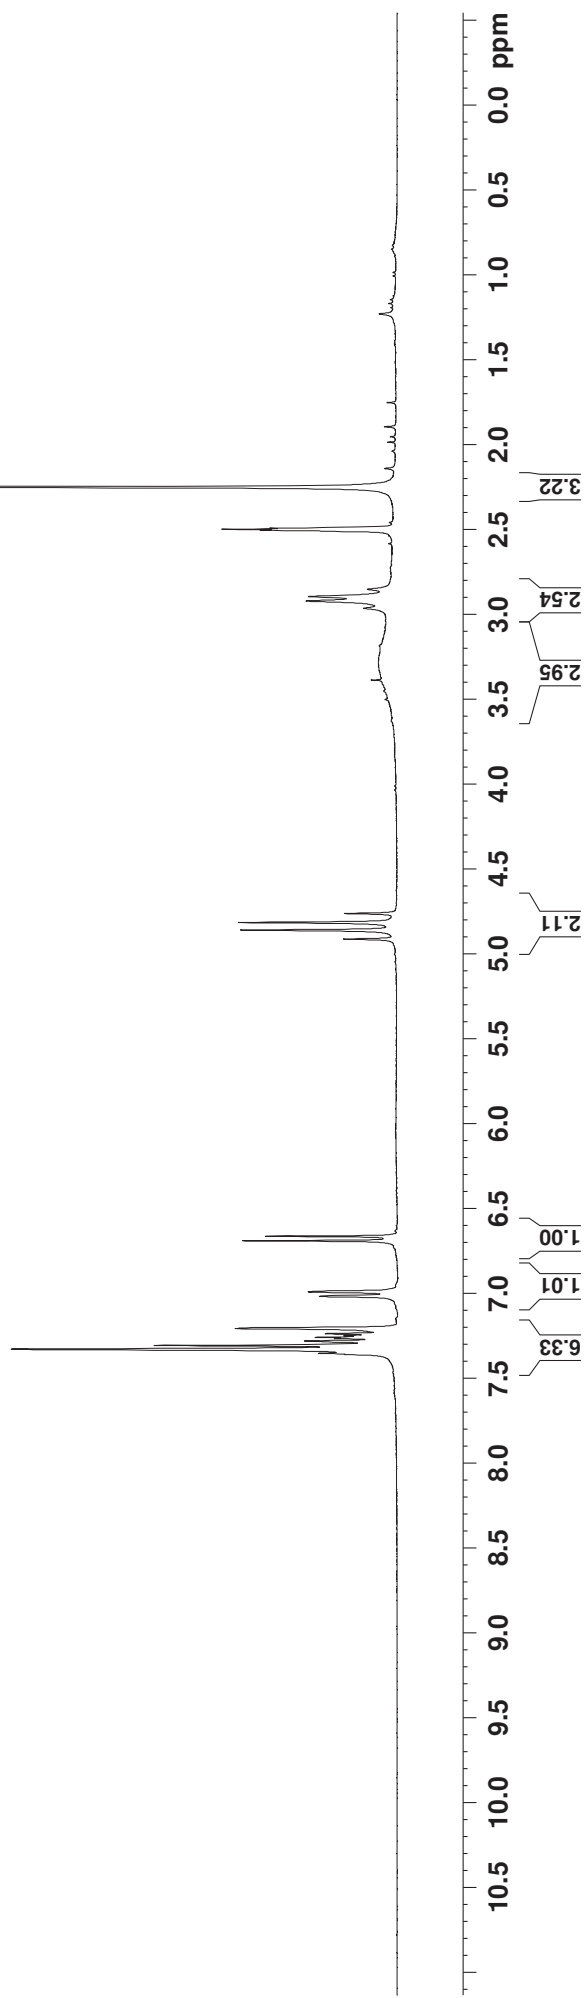

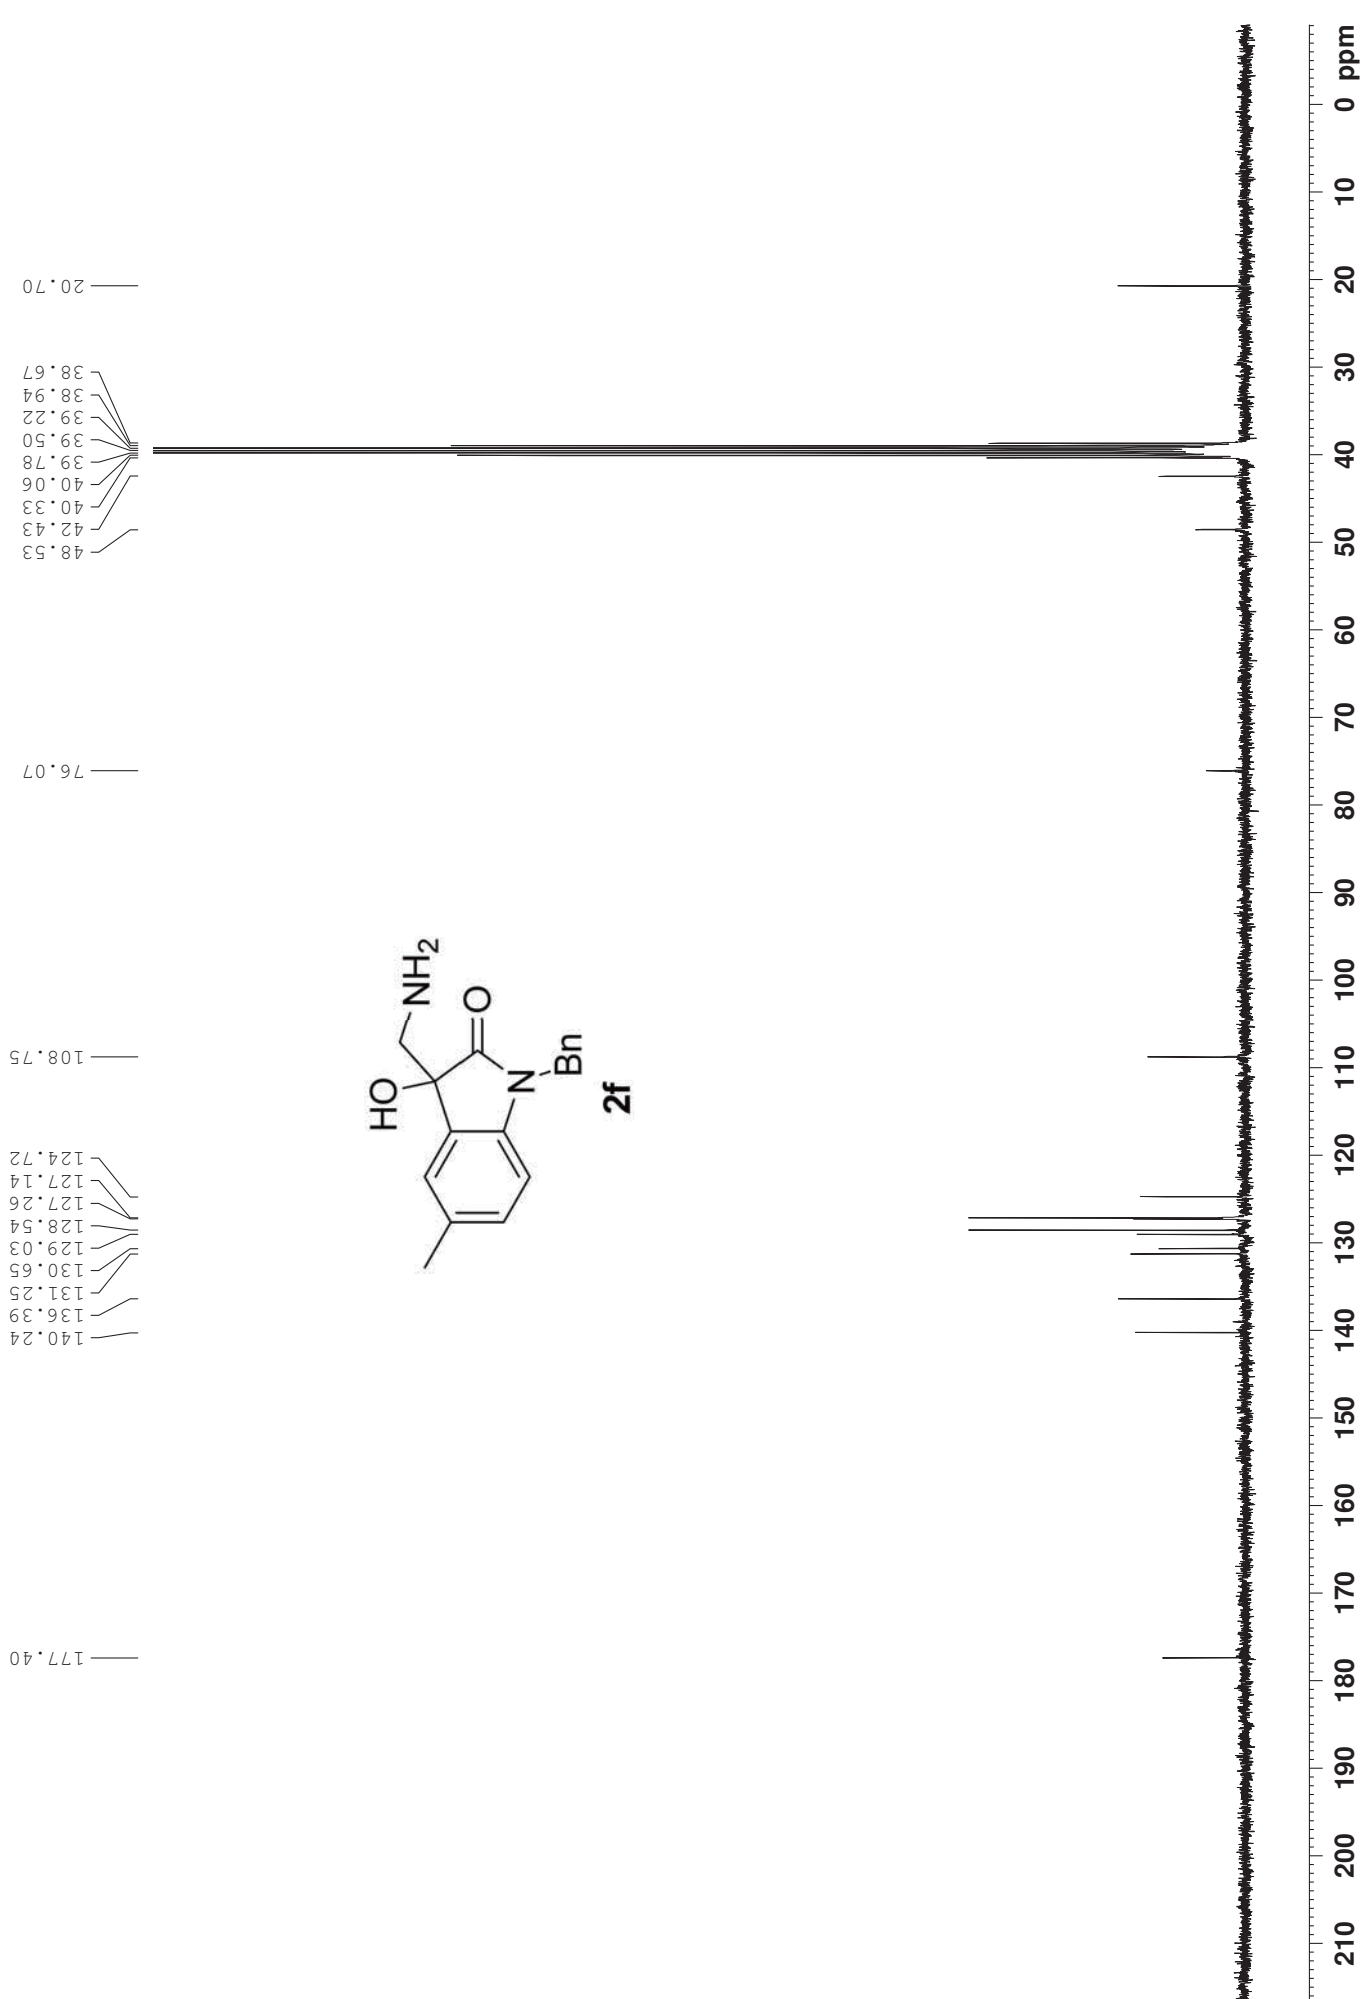

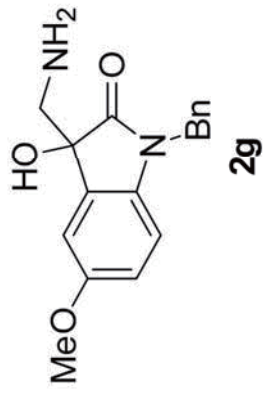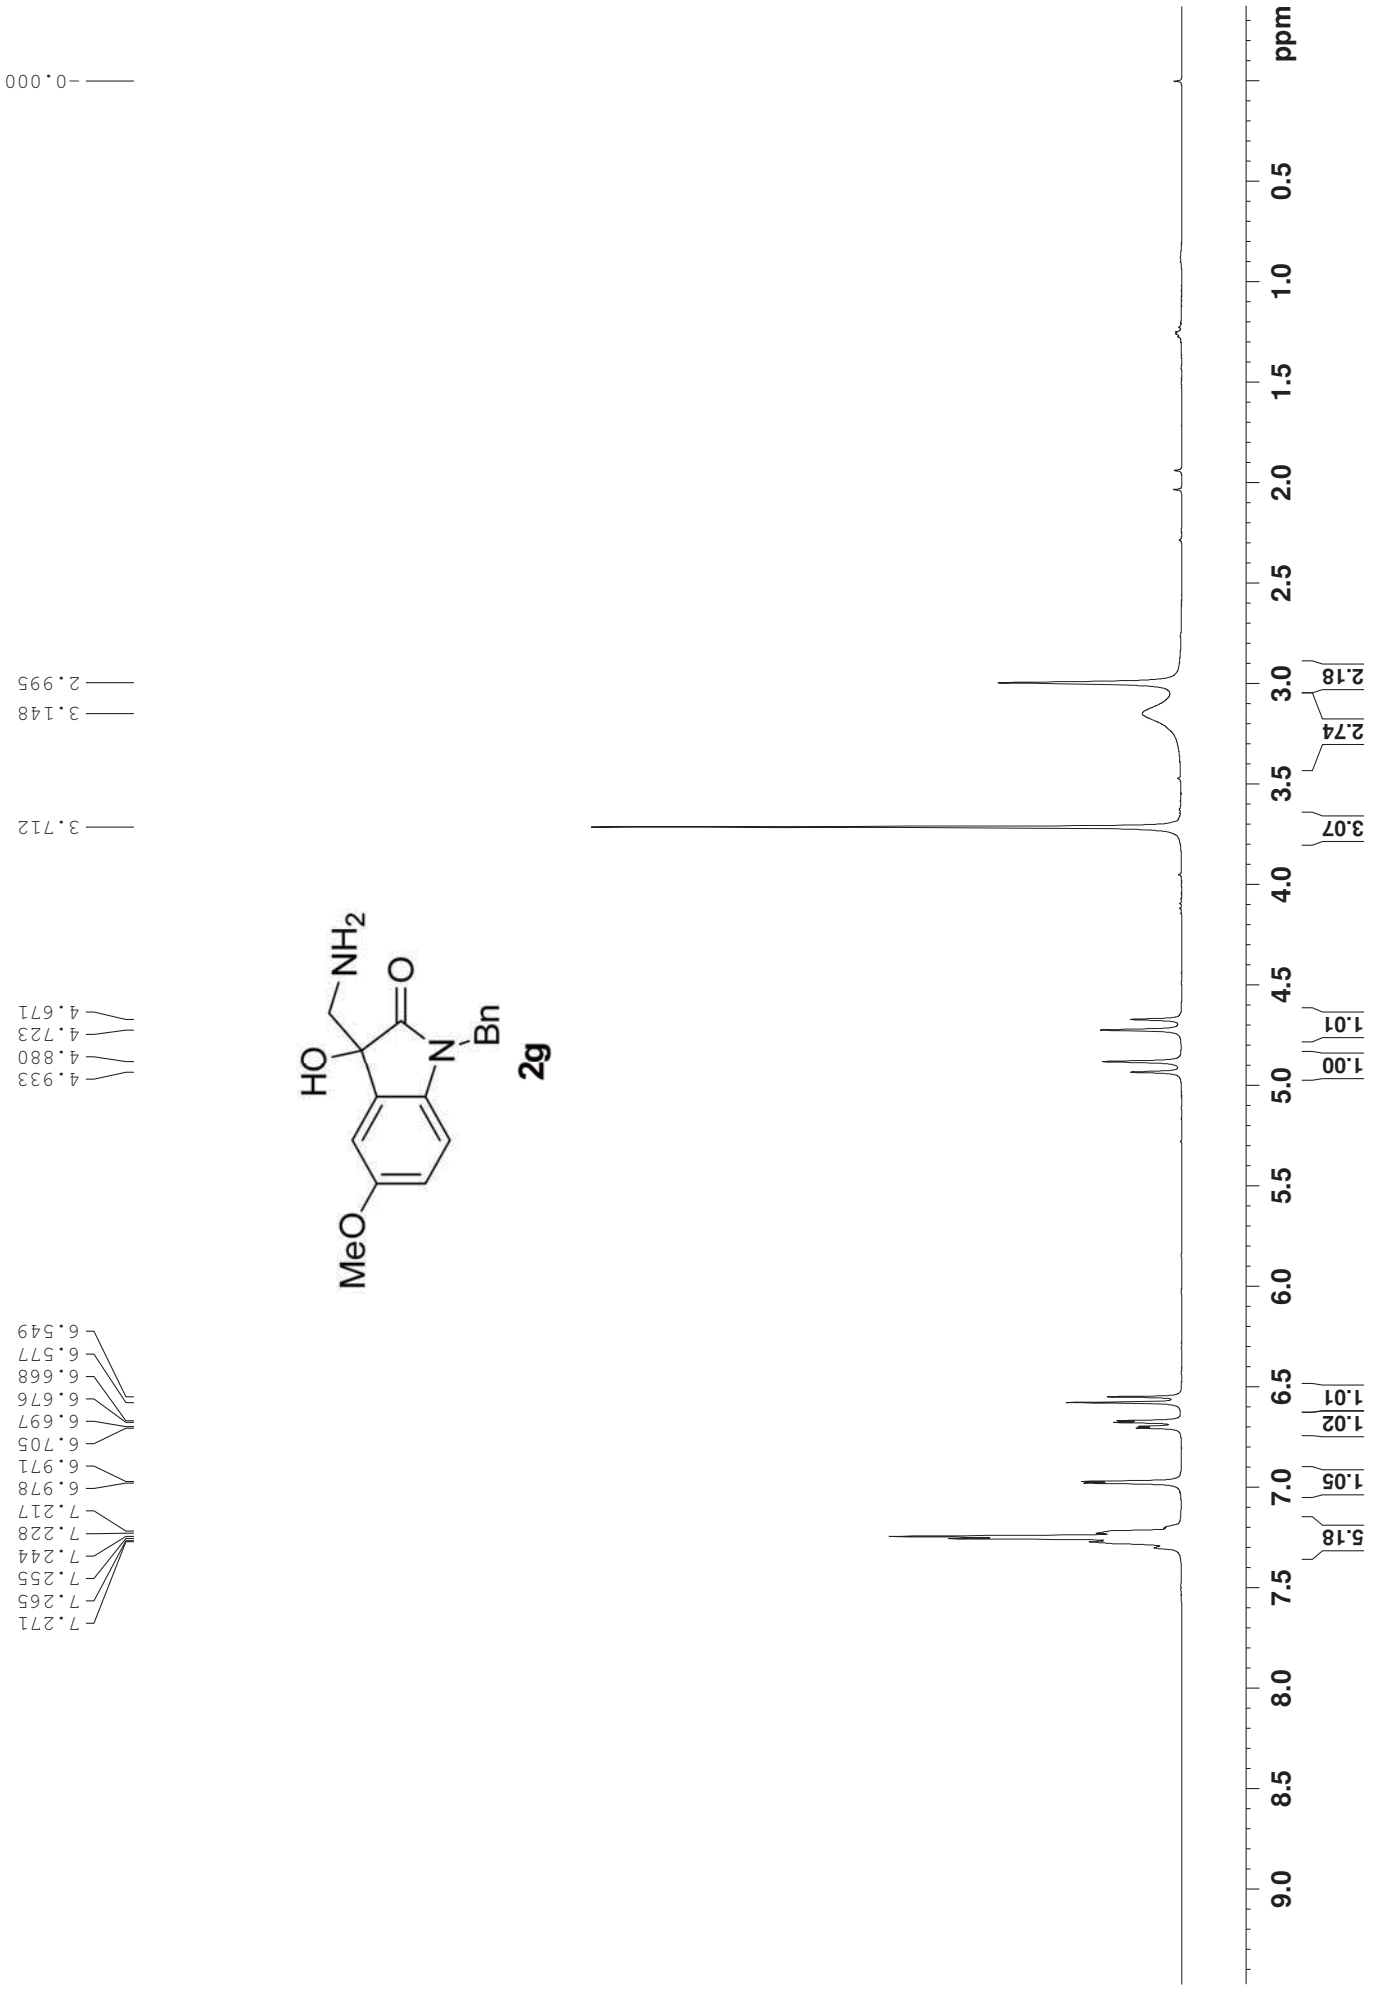

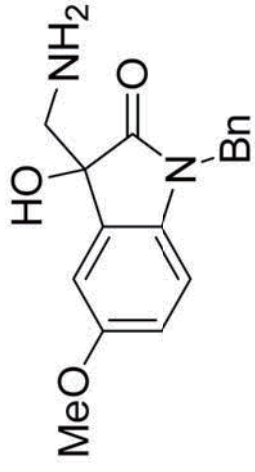

2g

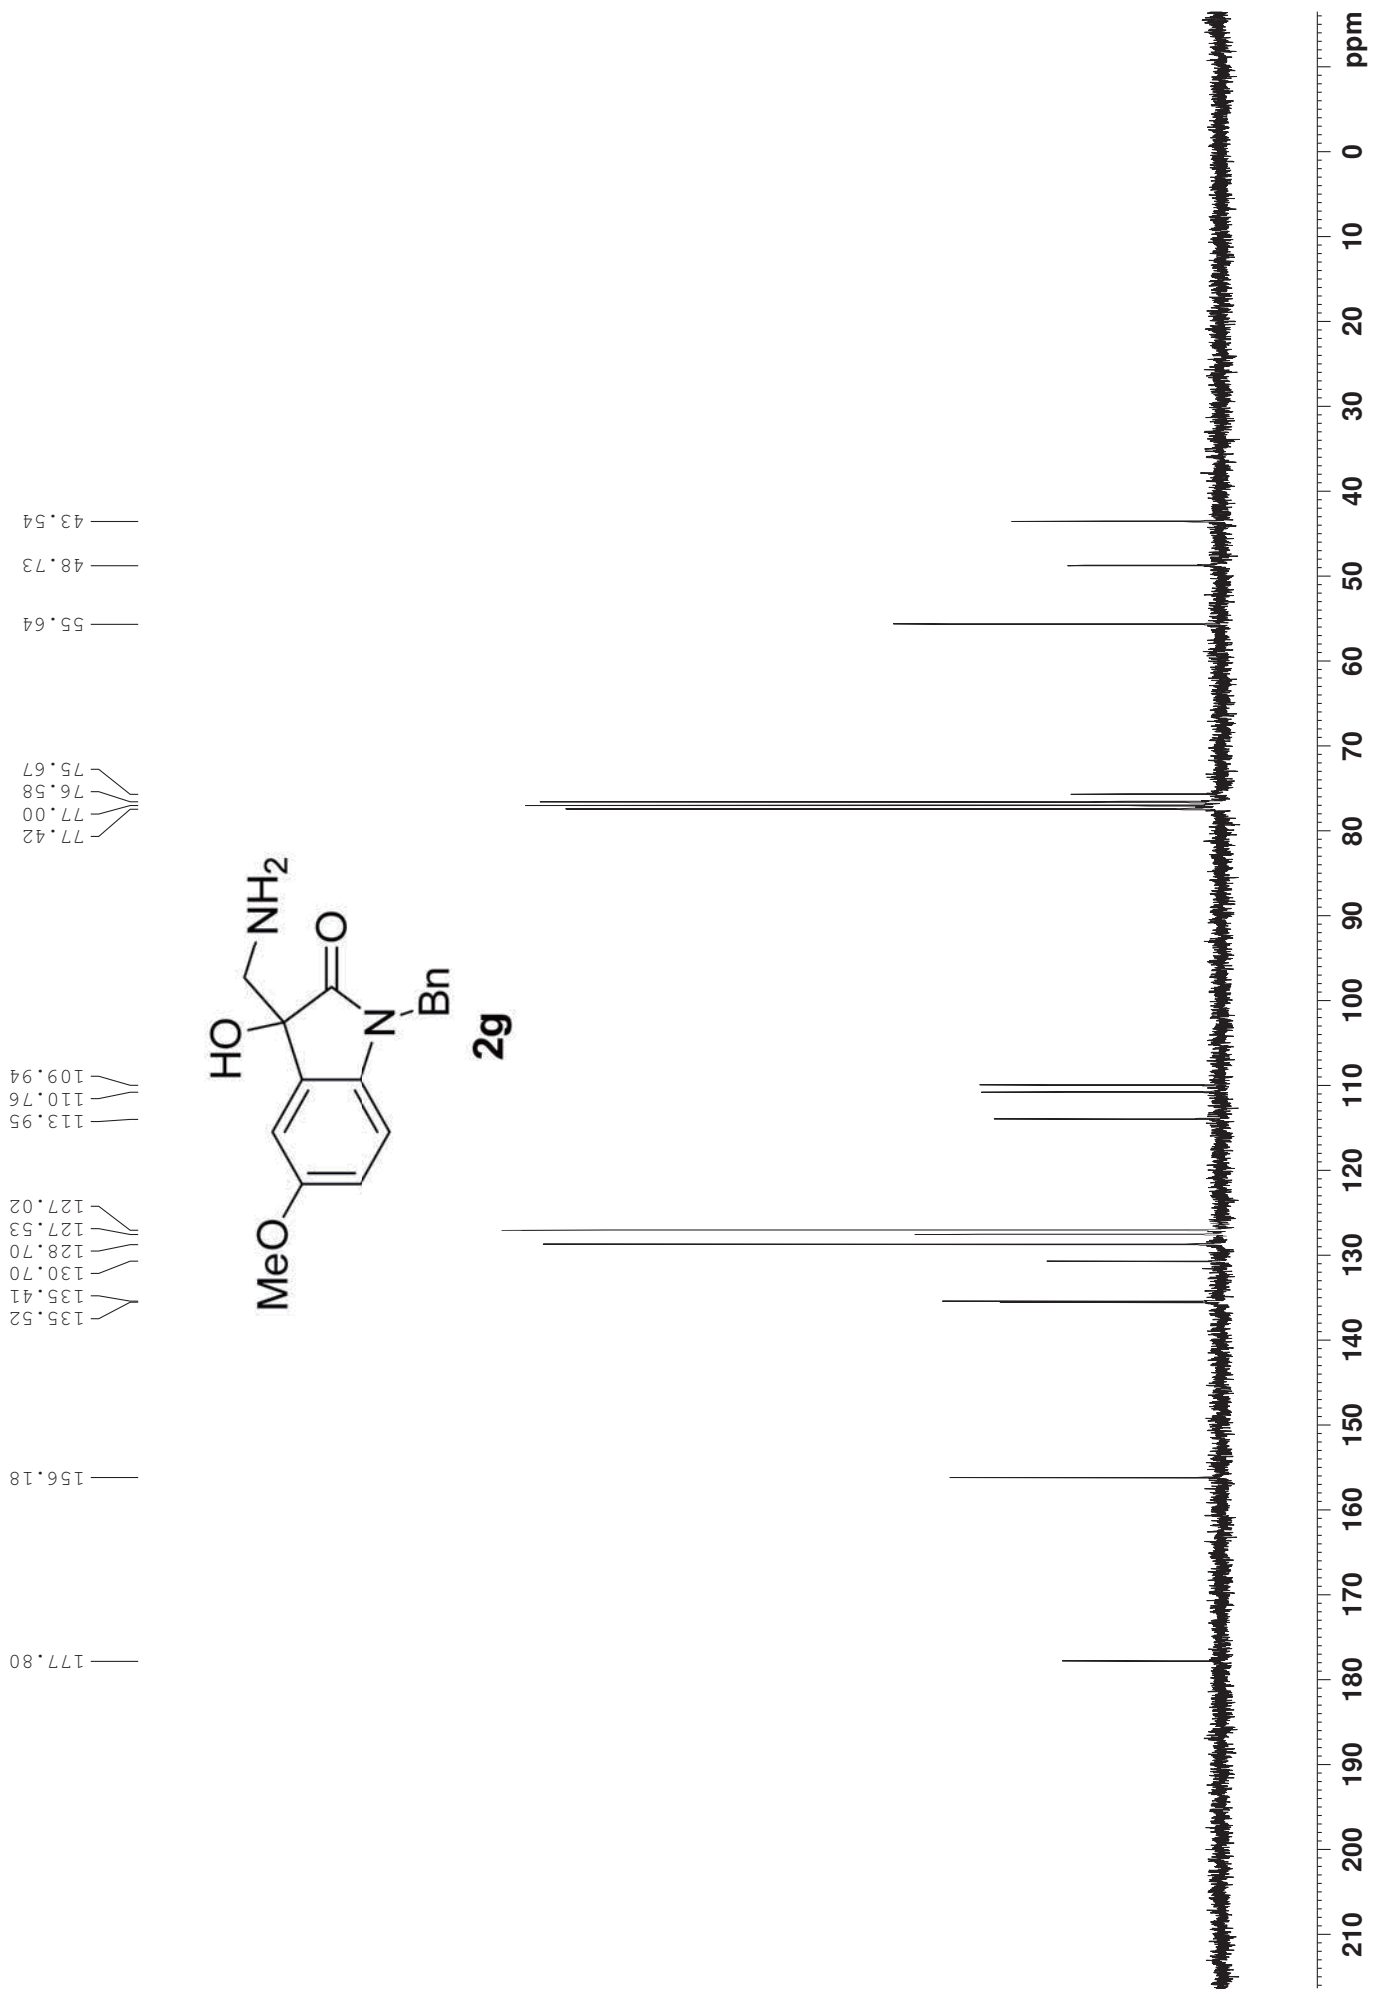

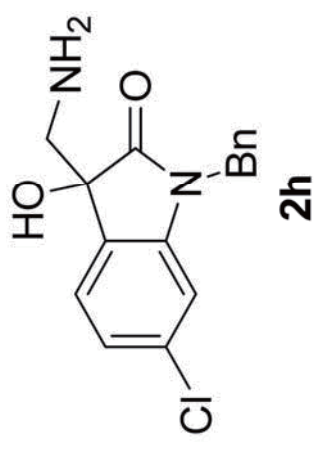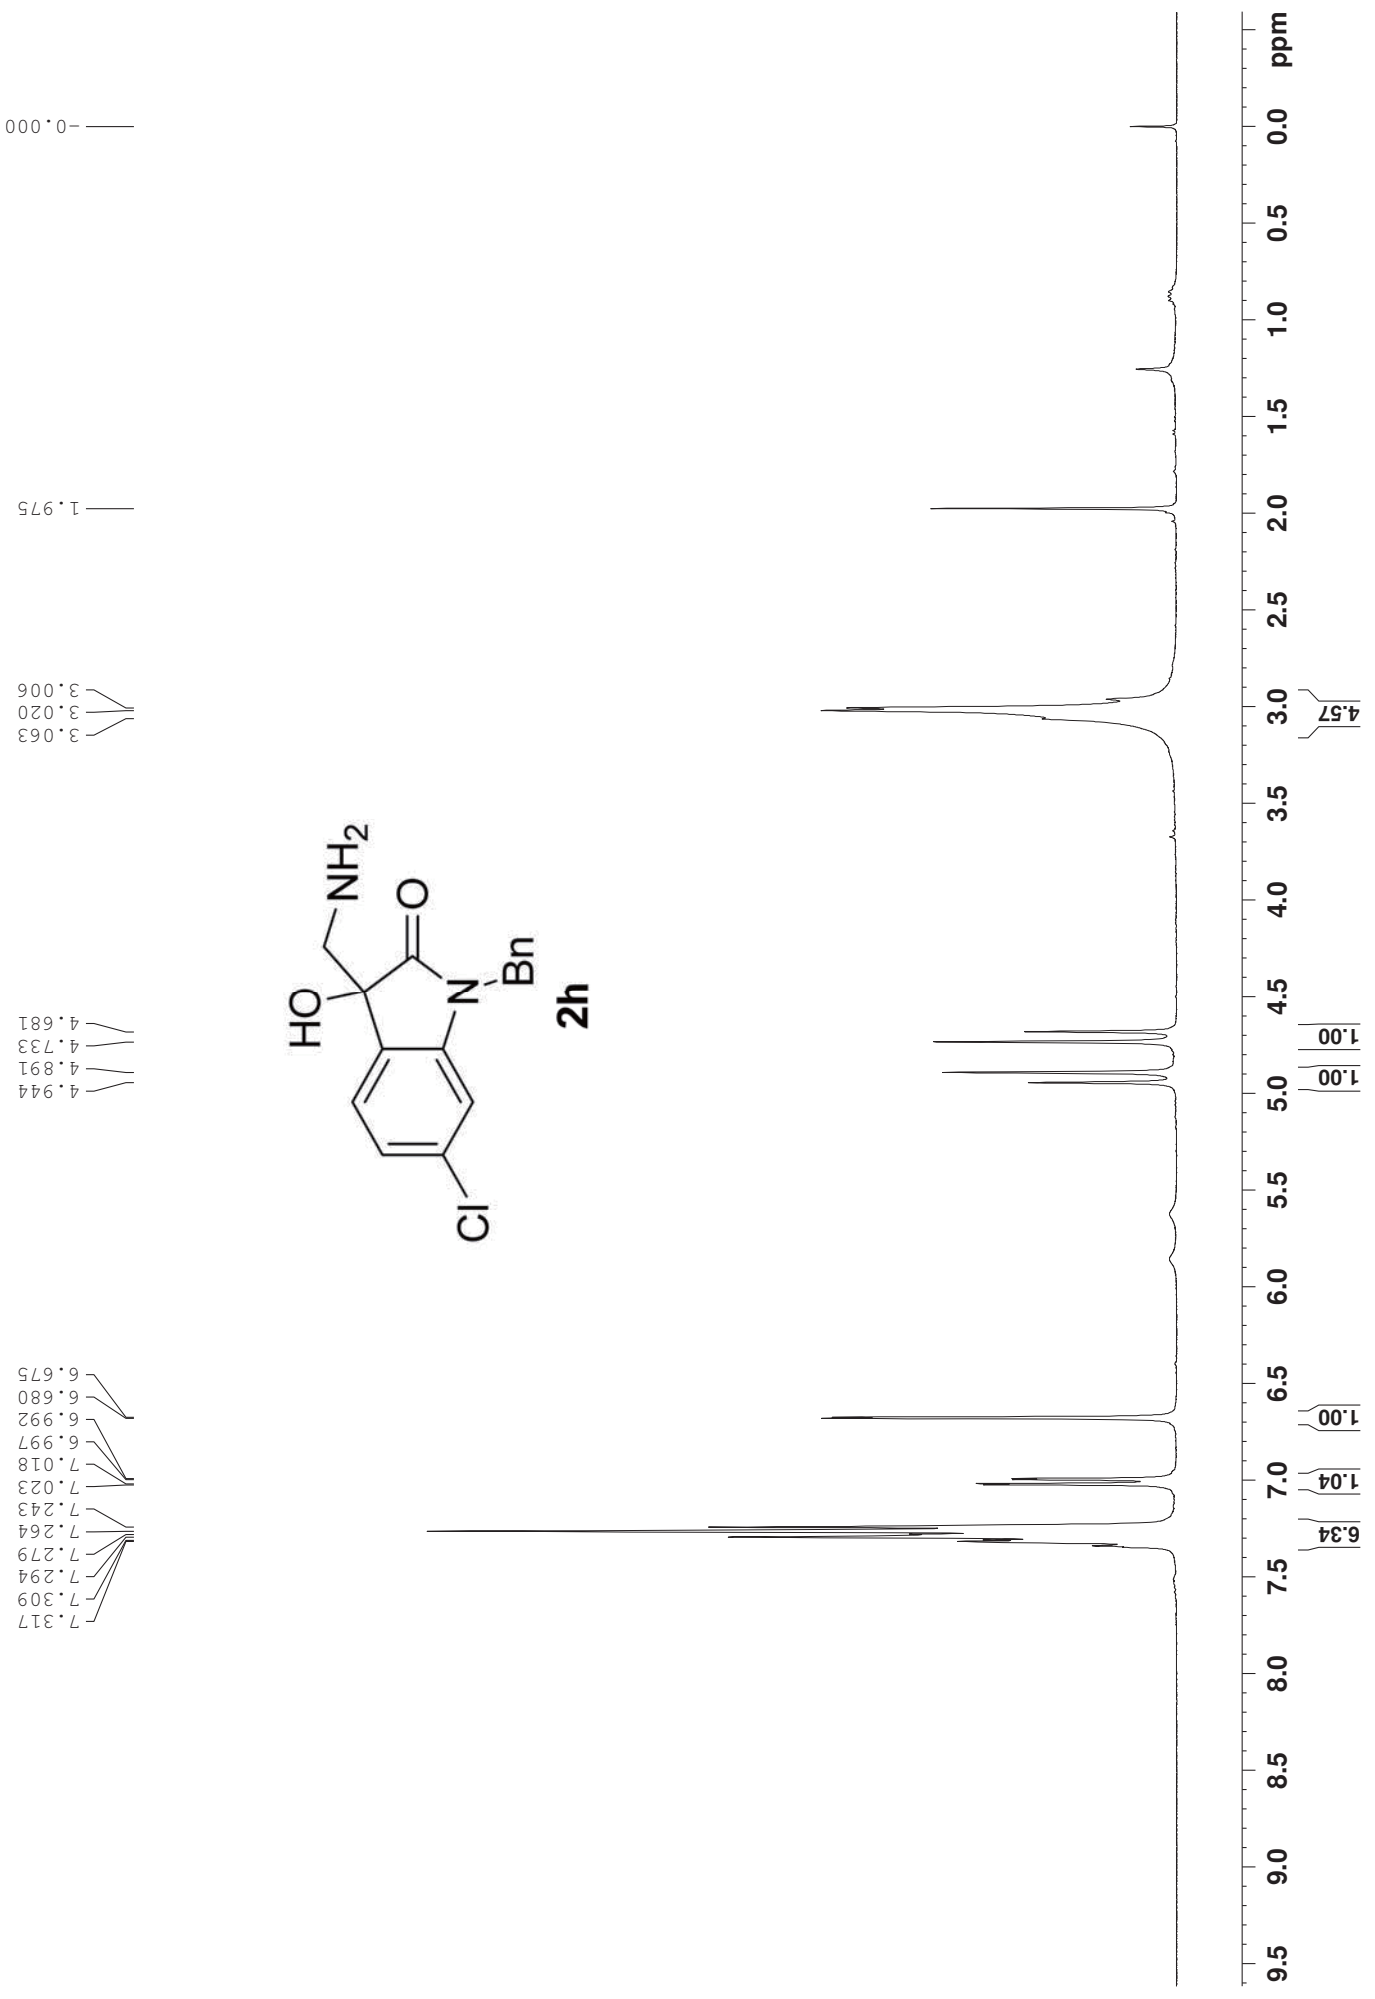



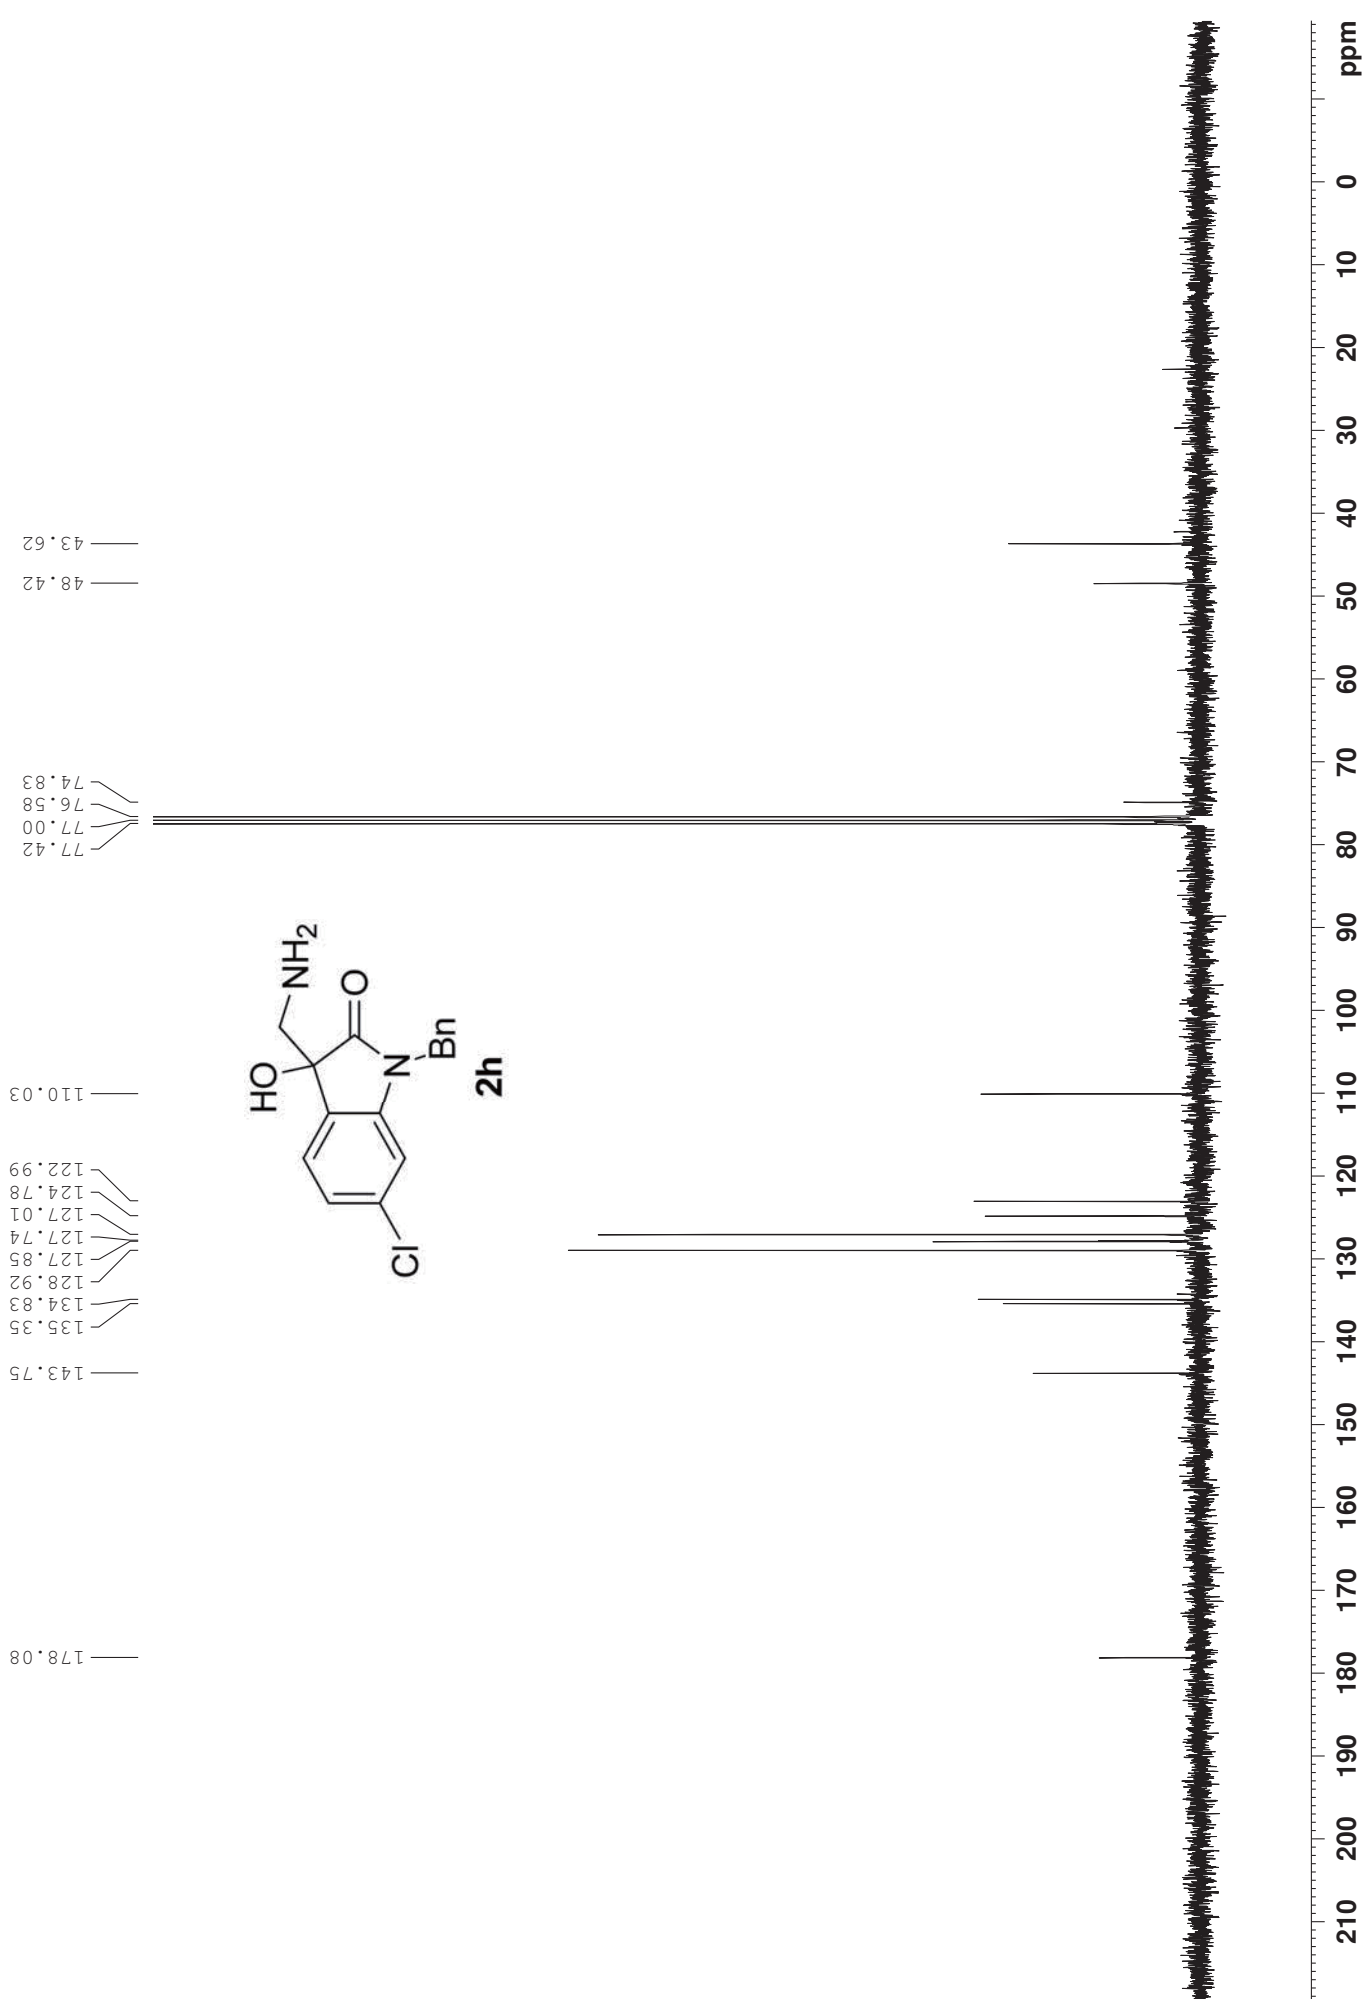

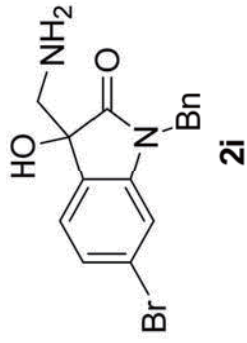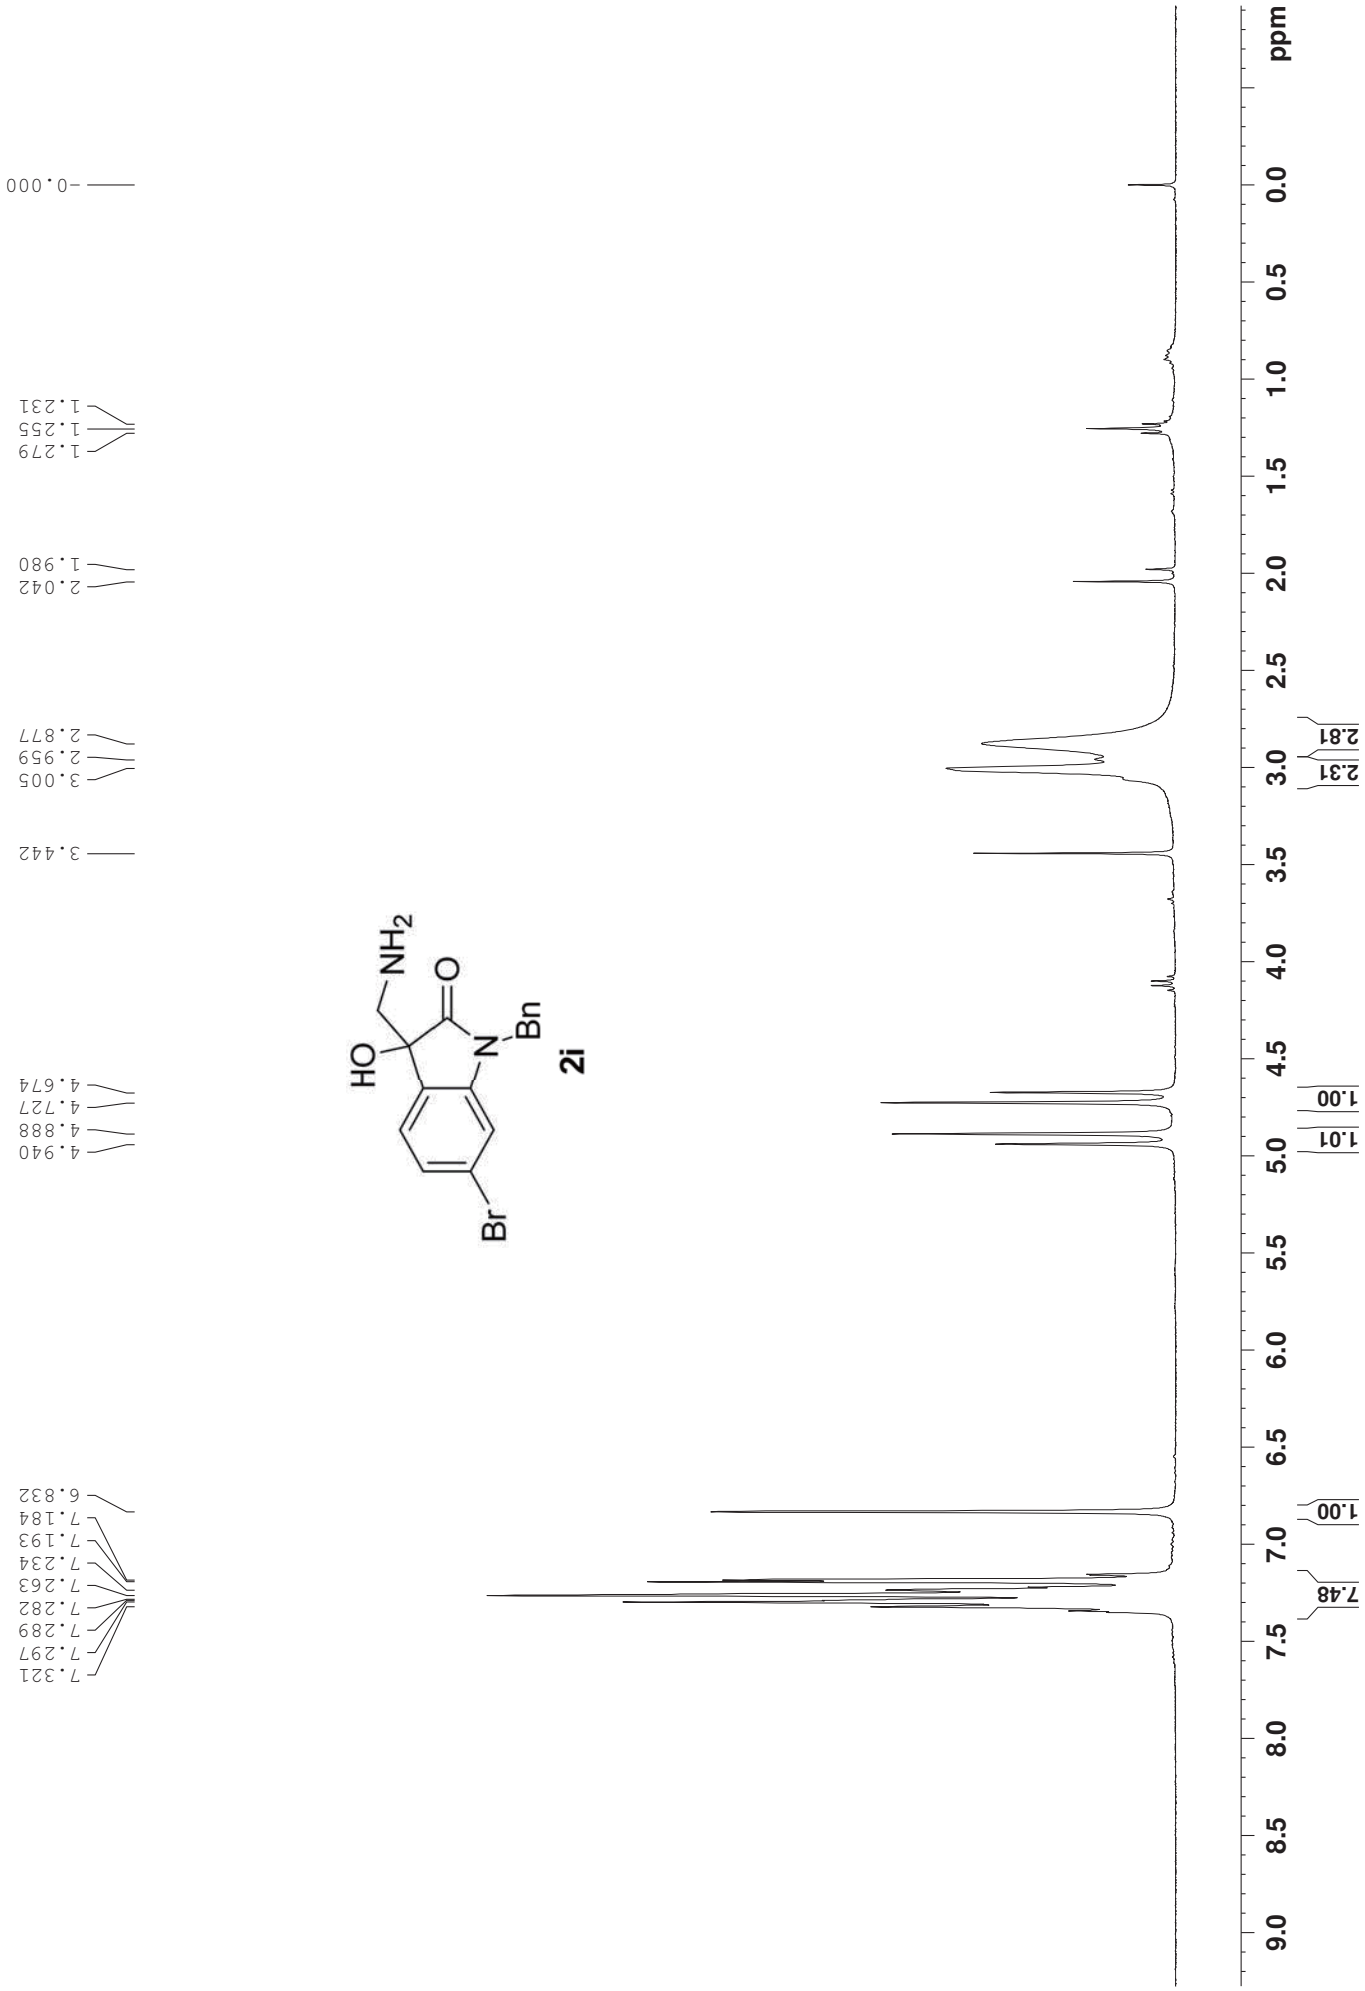

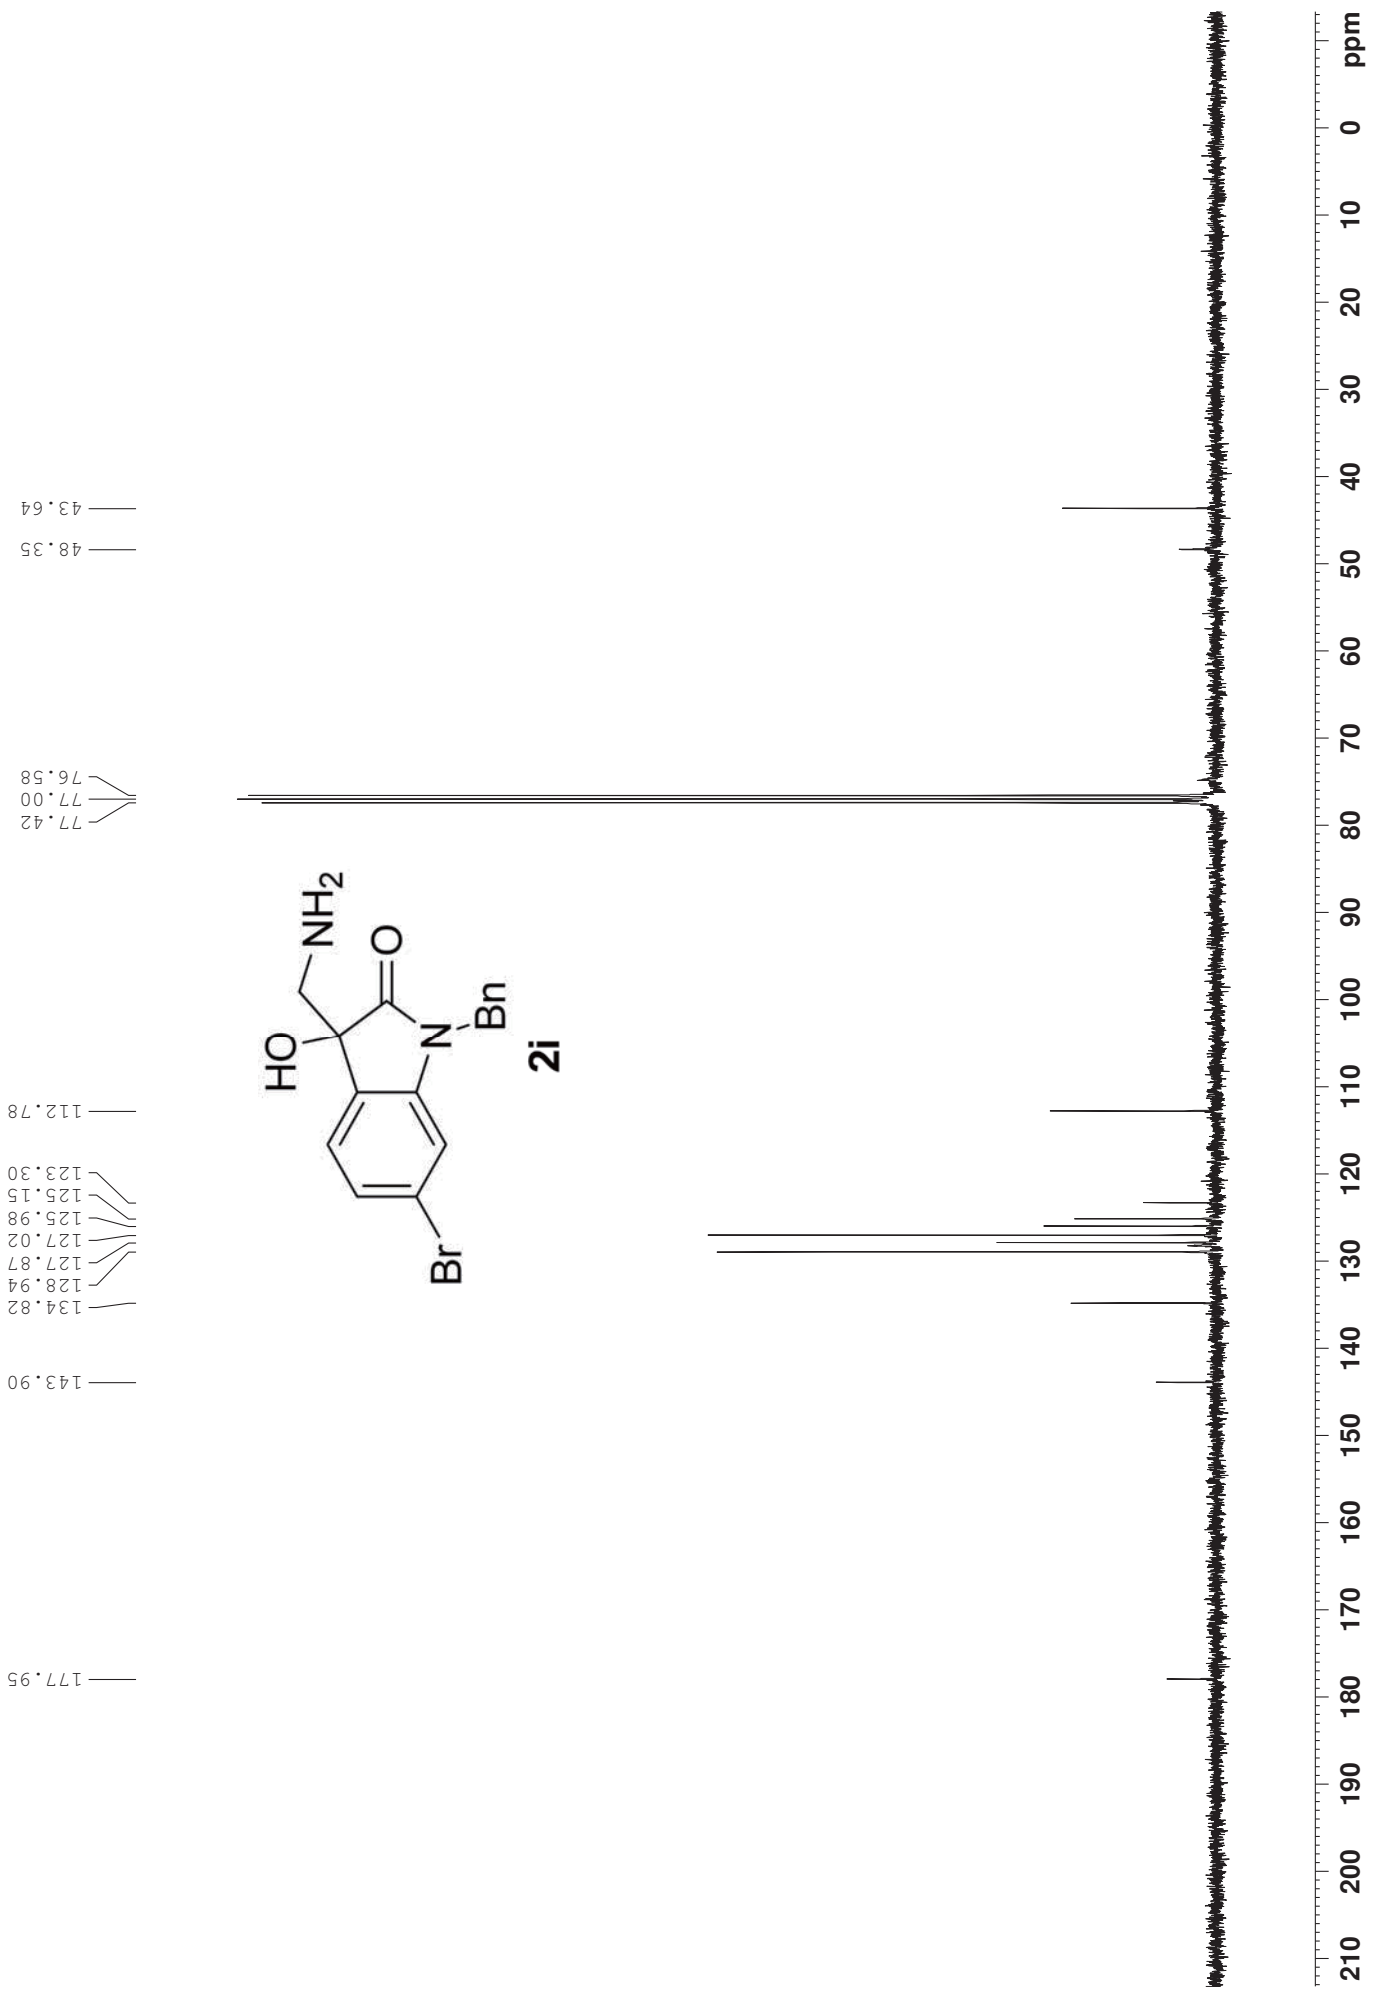

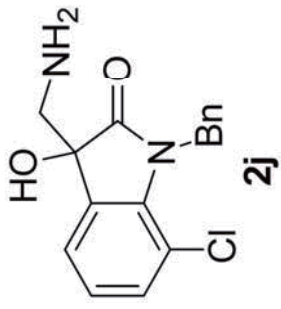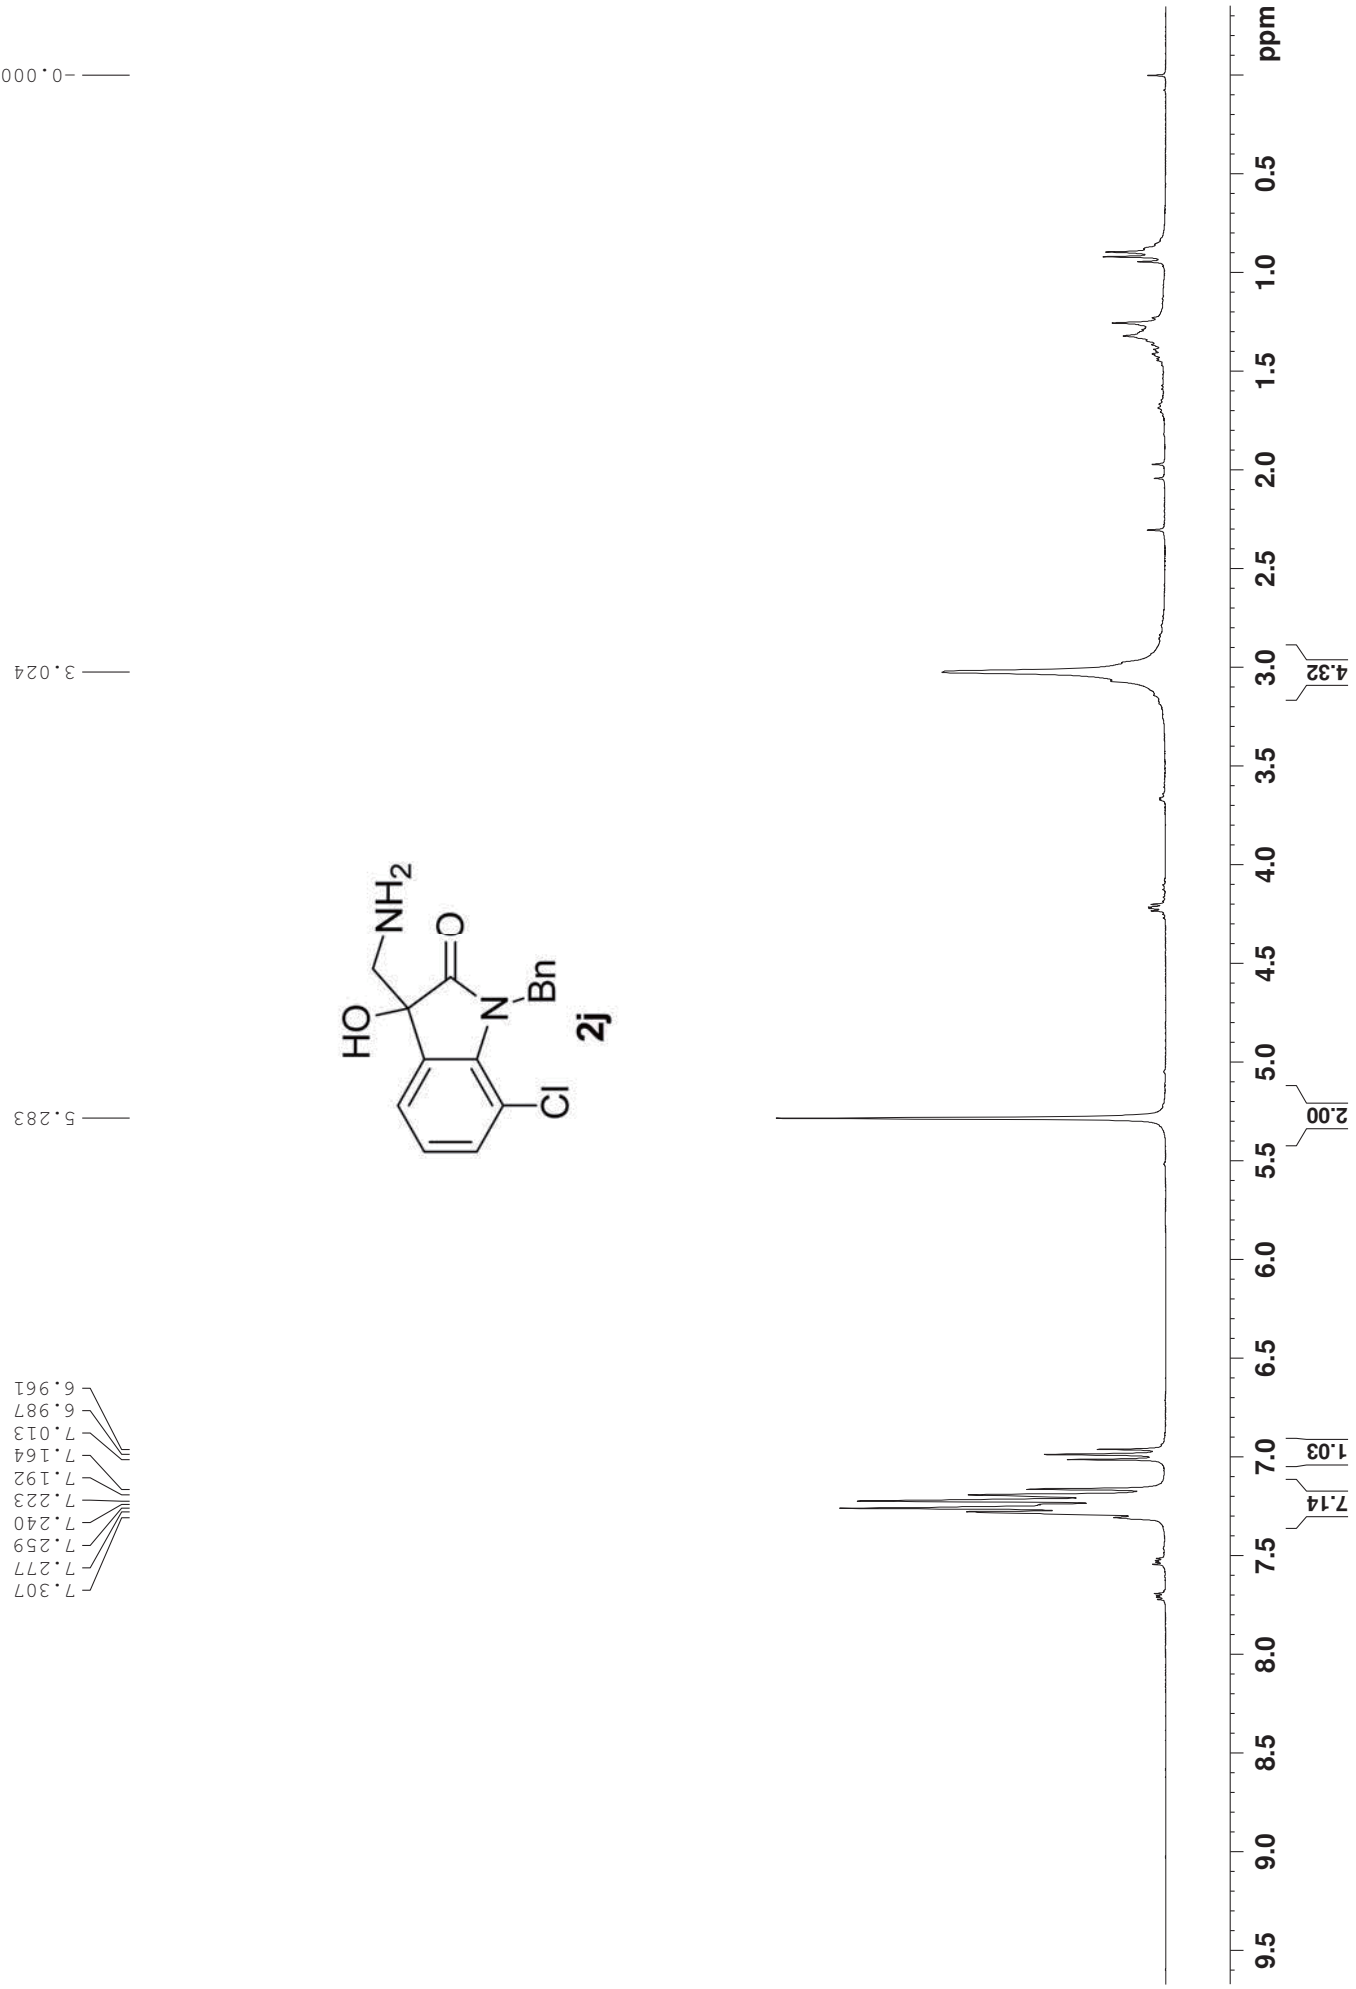

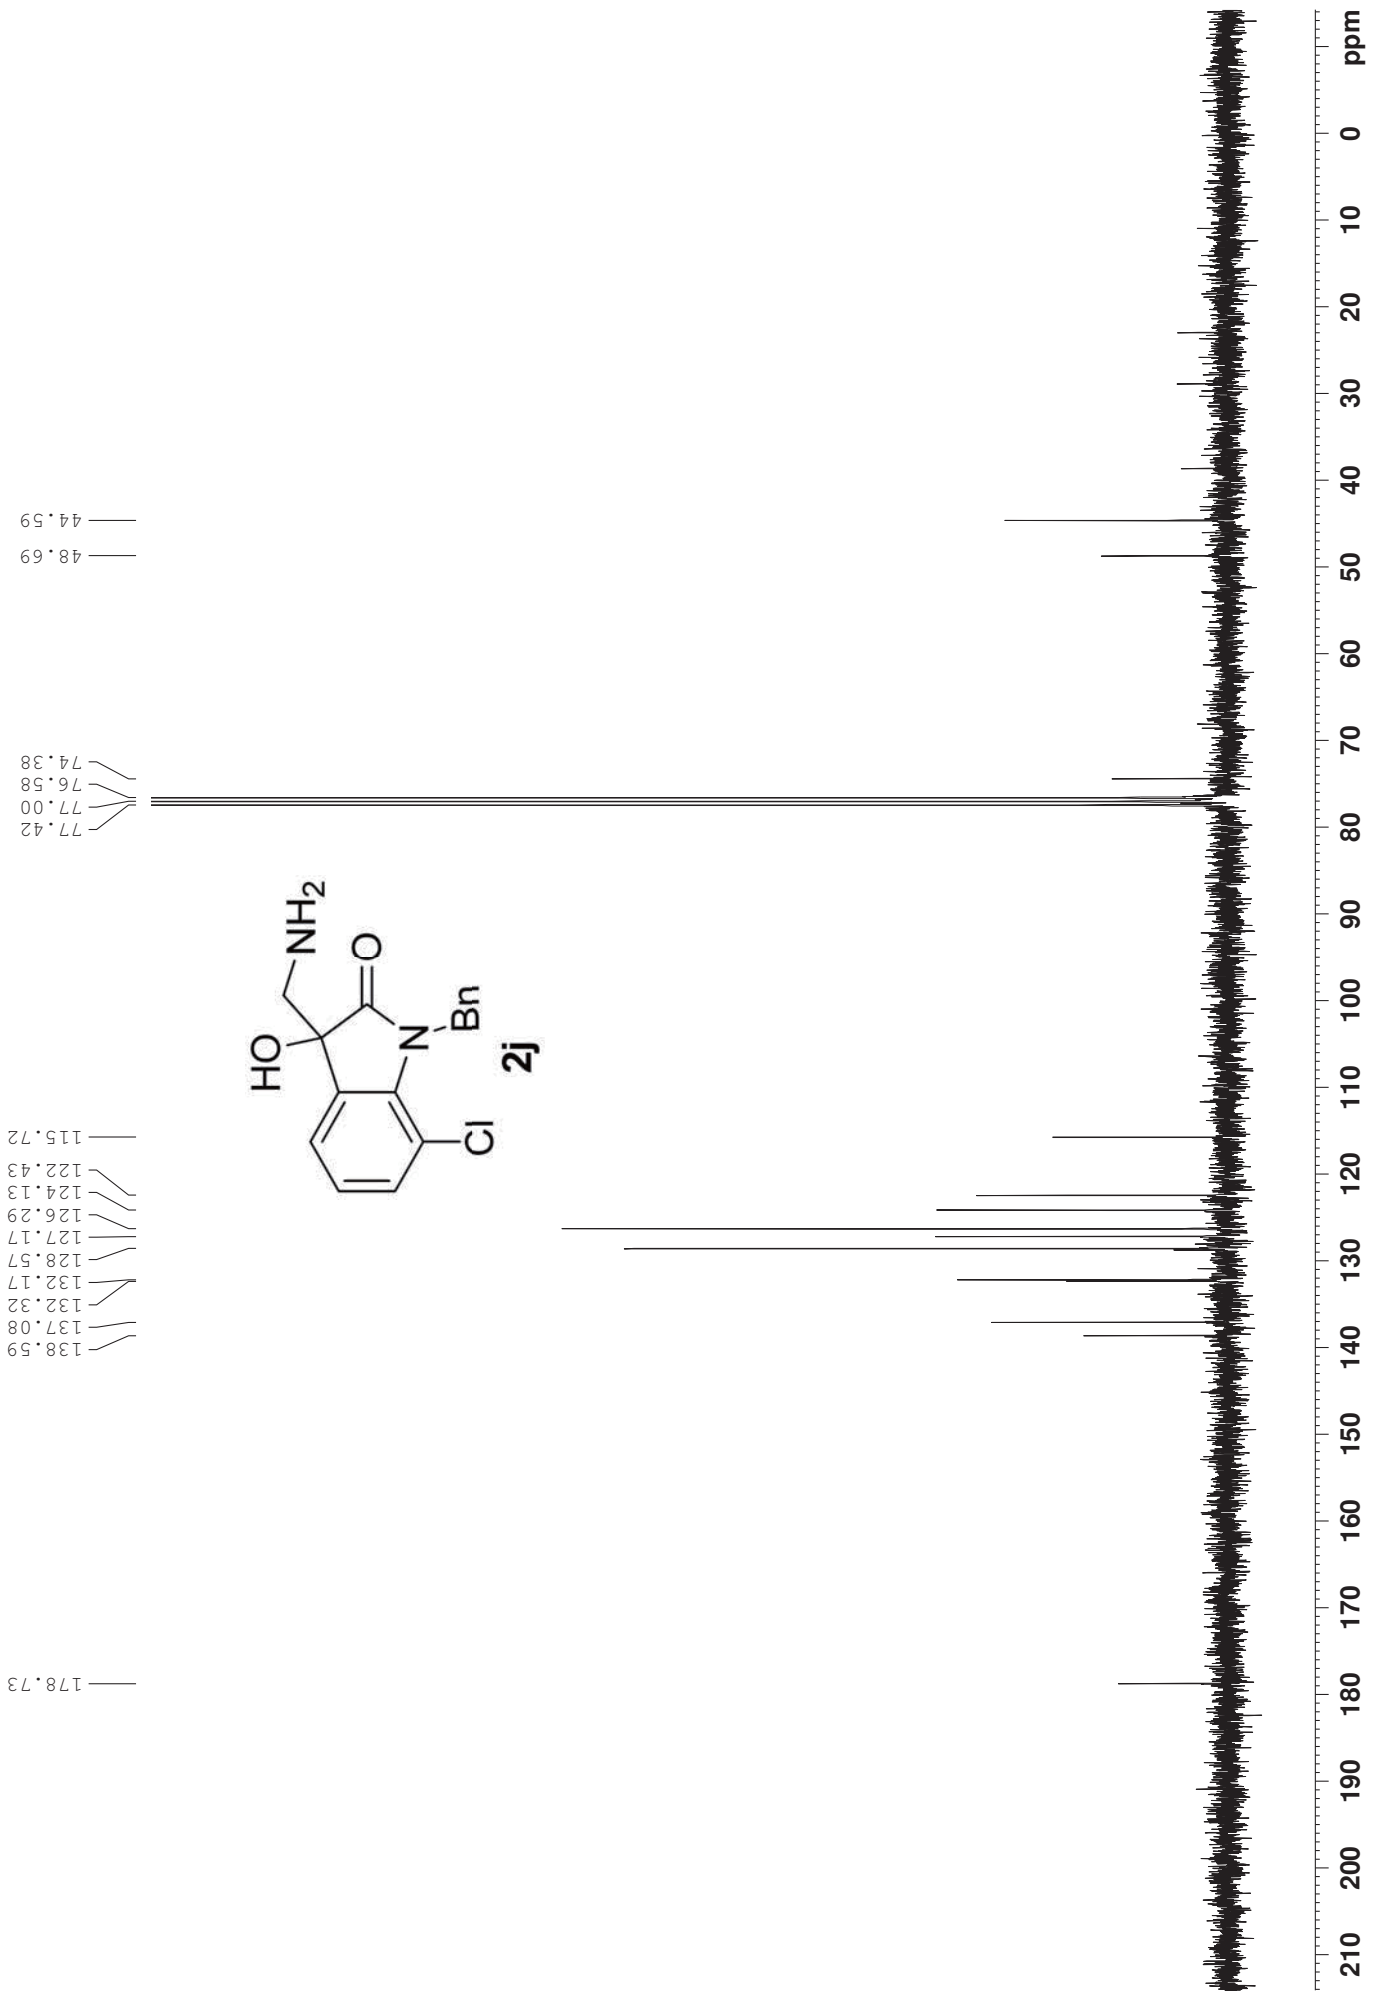

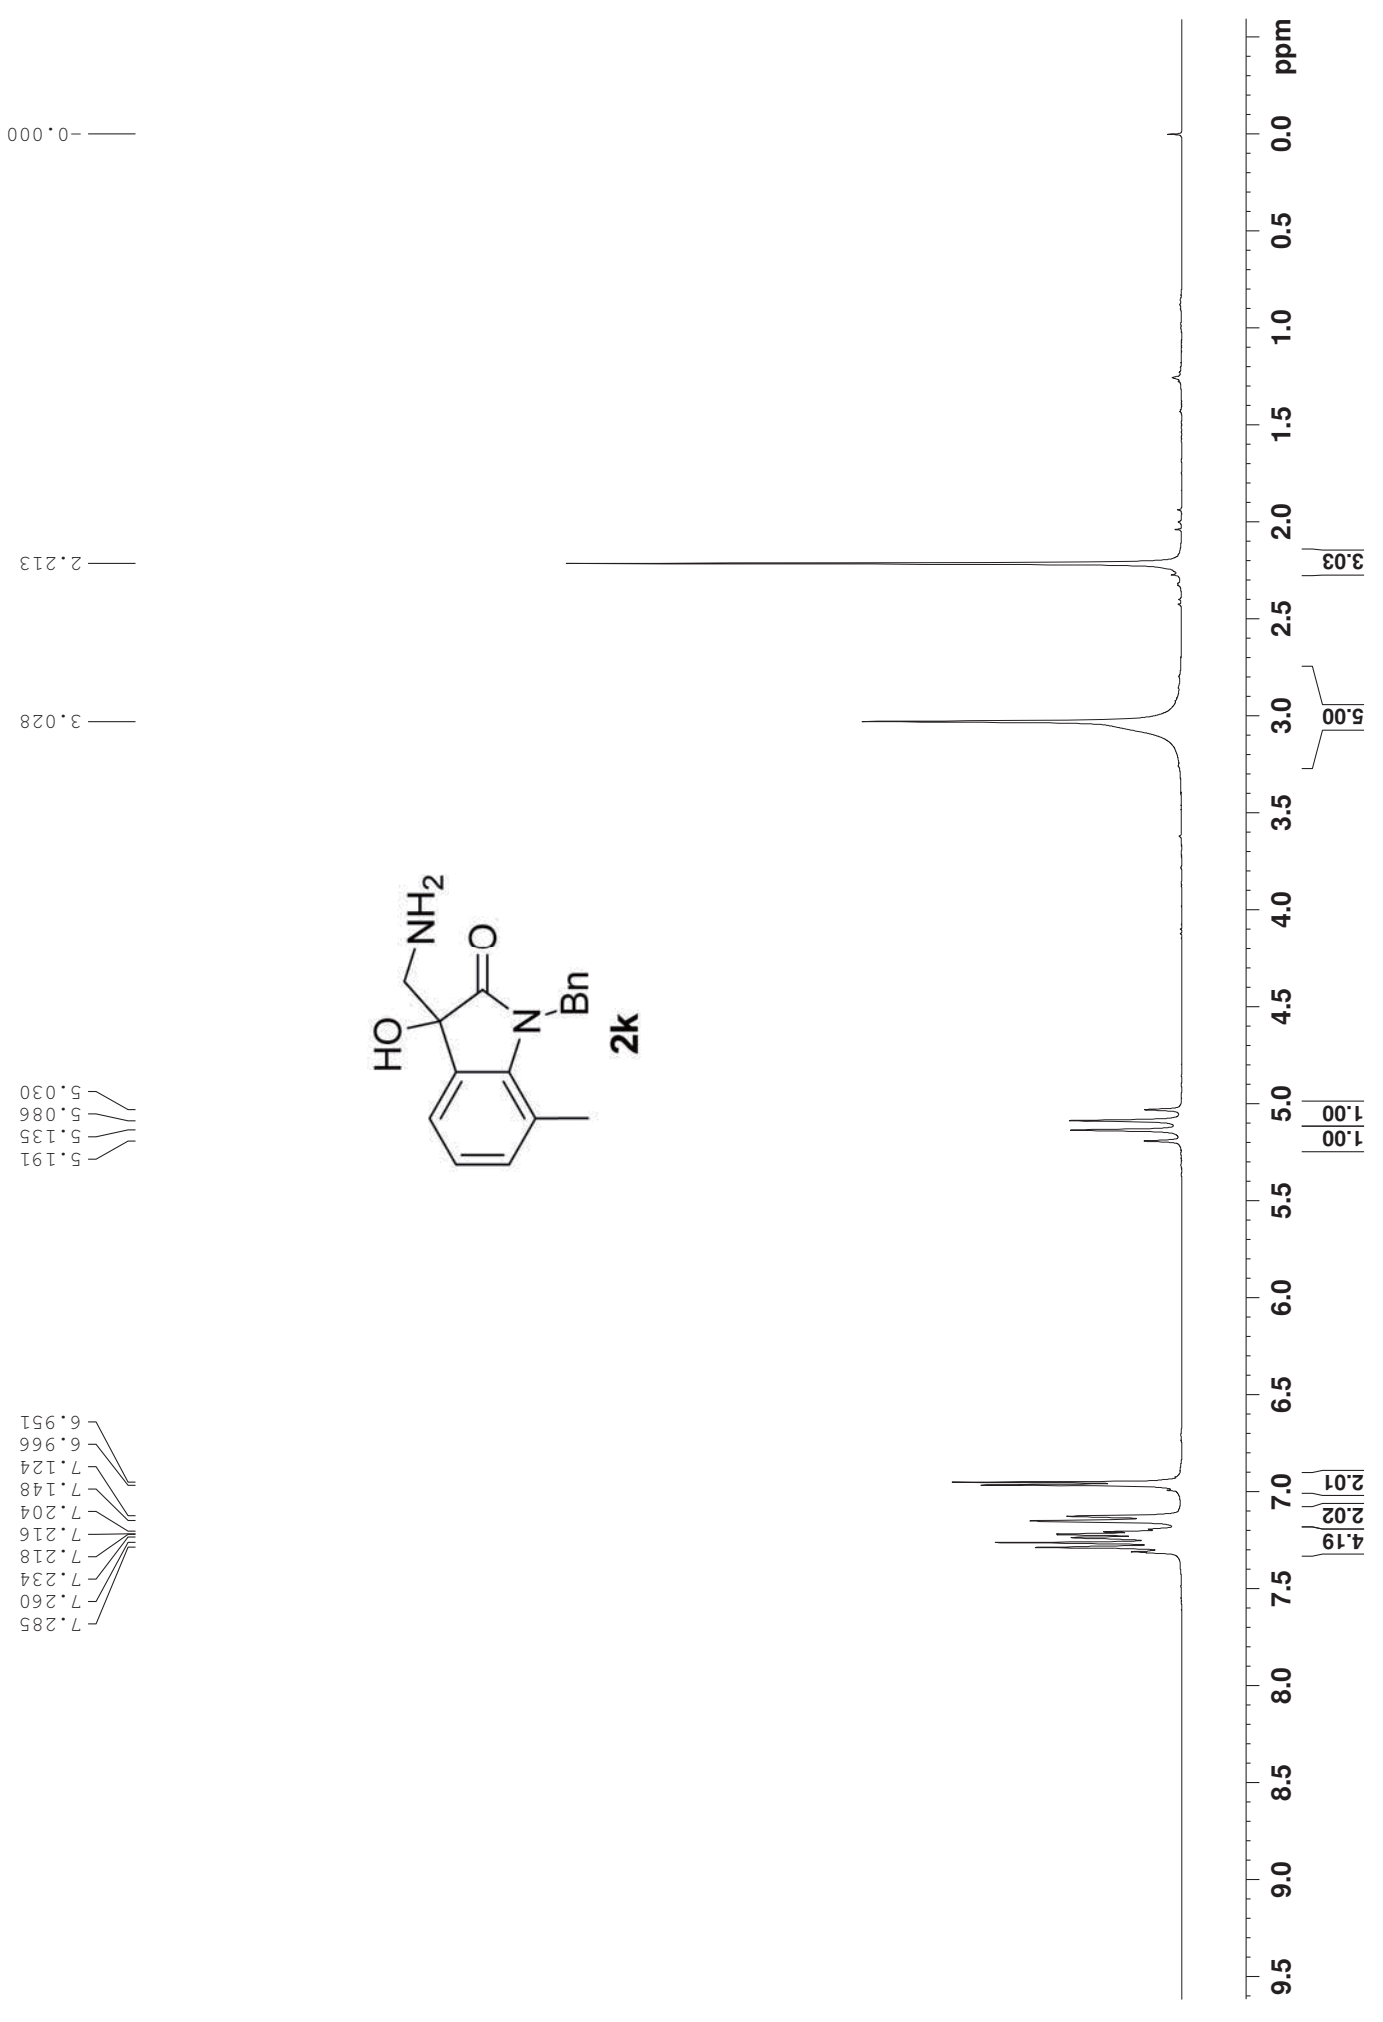

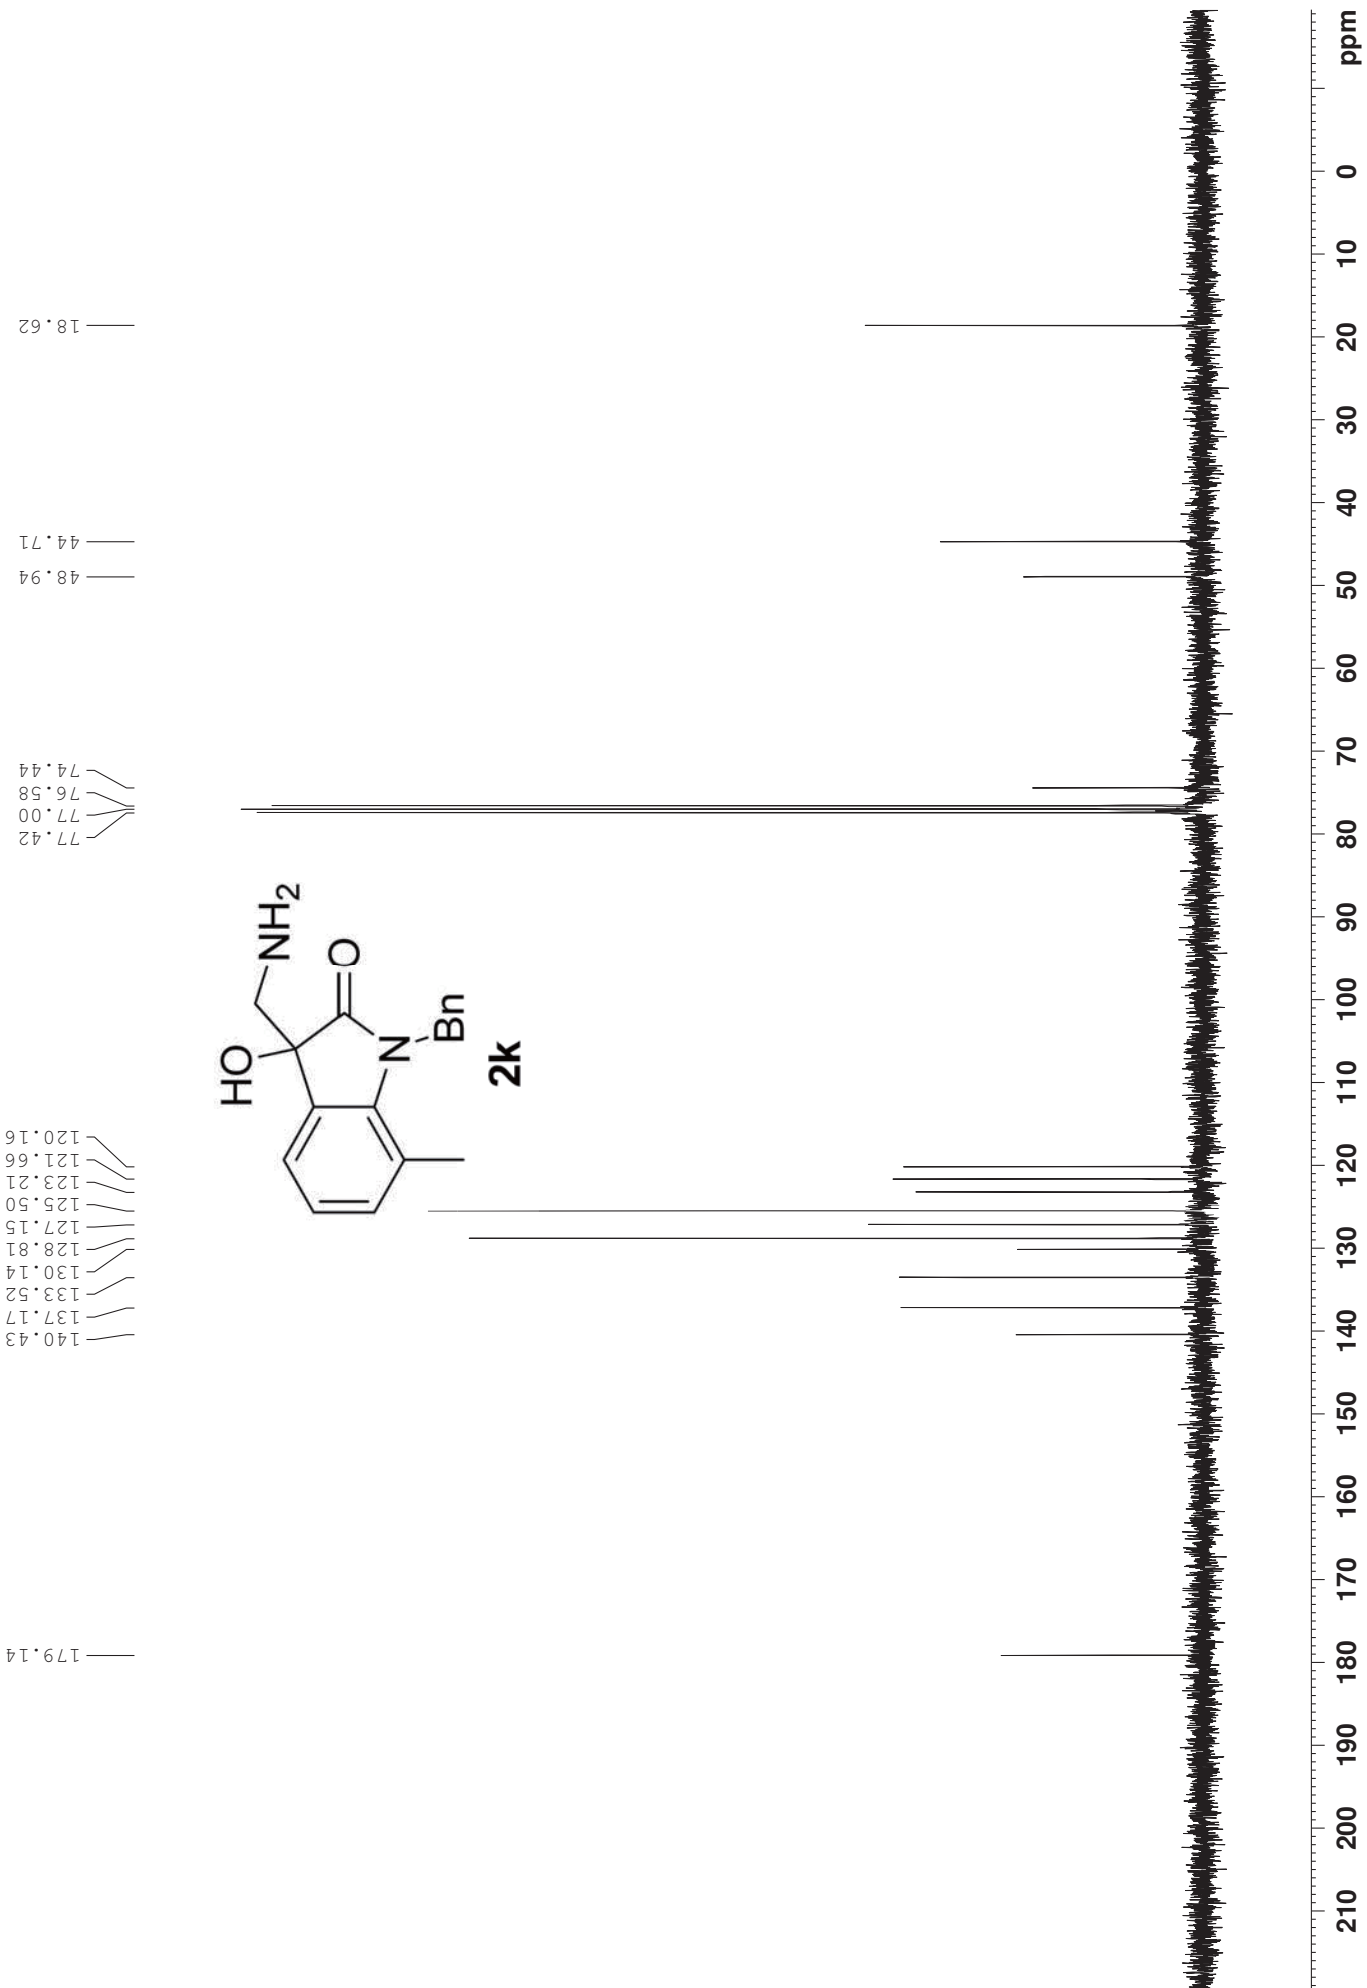

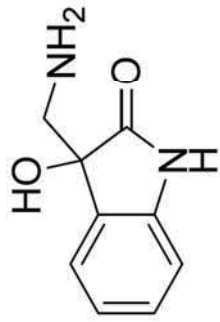

2I

3.533  
3.523  
3.509  
3.492  
3.451  
3.429  
3.411  
3.373  
3.325  
3.291  
3.273  
3.256  
3.227  
2.973  
2.929  
2.906  
2.862  
2.492

7.363  
7.339  
7.261  
7.236  
7.211  
7.196  
7.003  
6.979  
6.954  
6.848  
6.822  
6.800

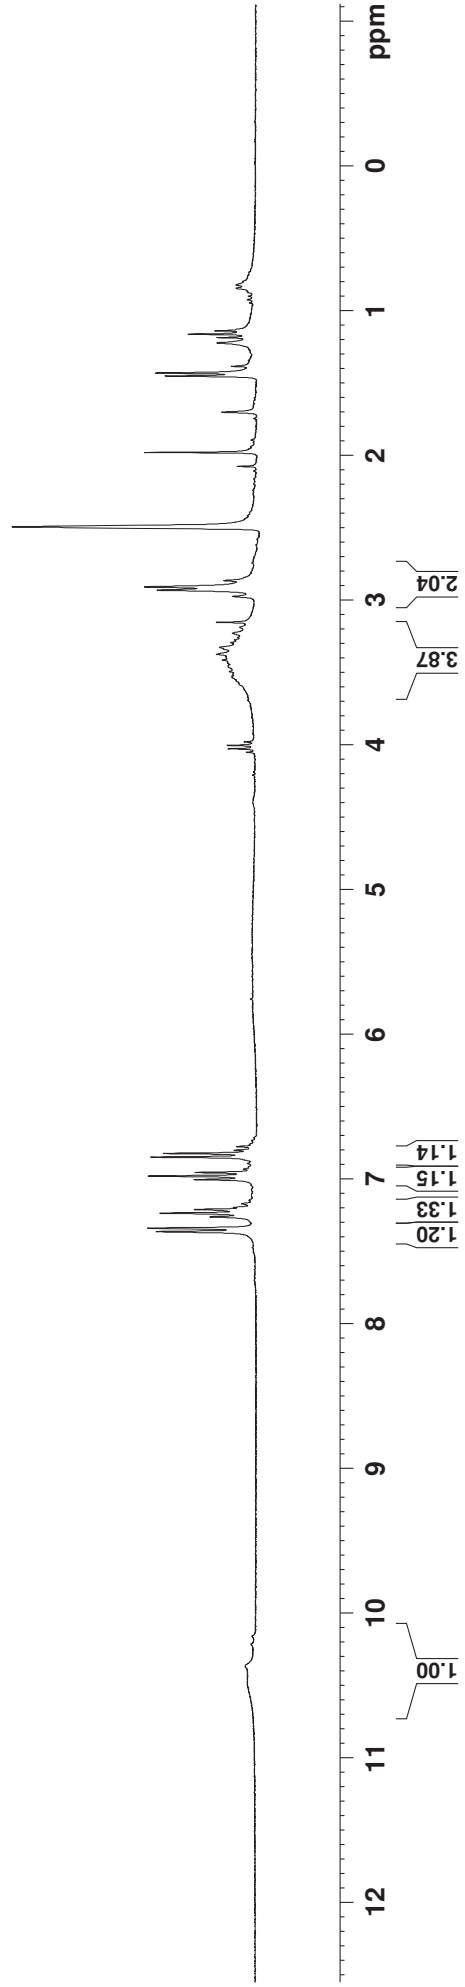



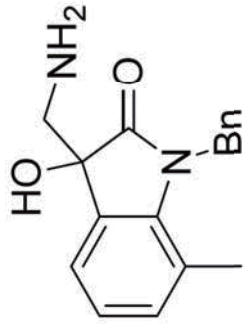

2k

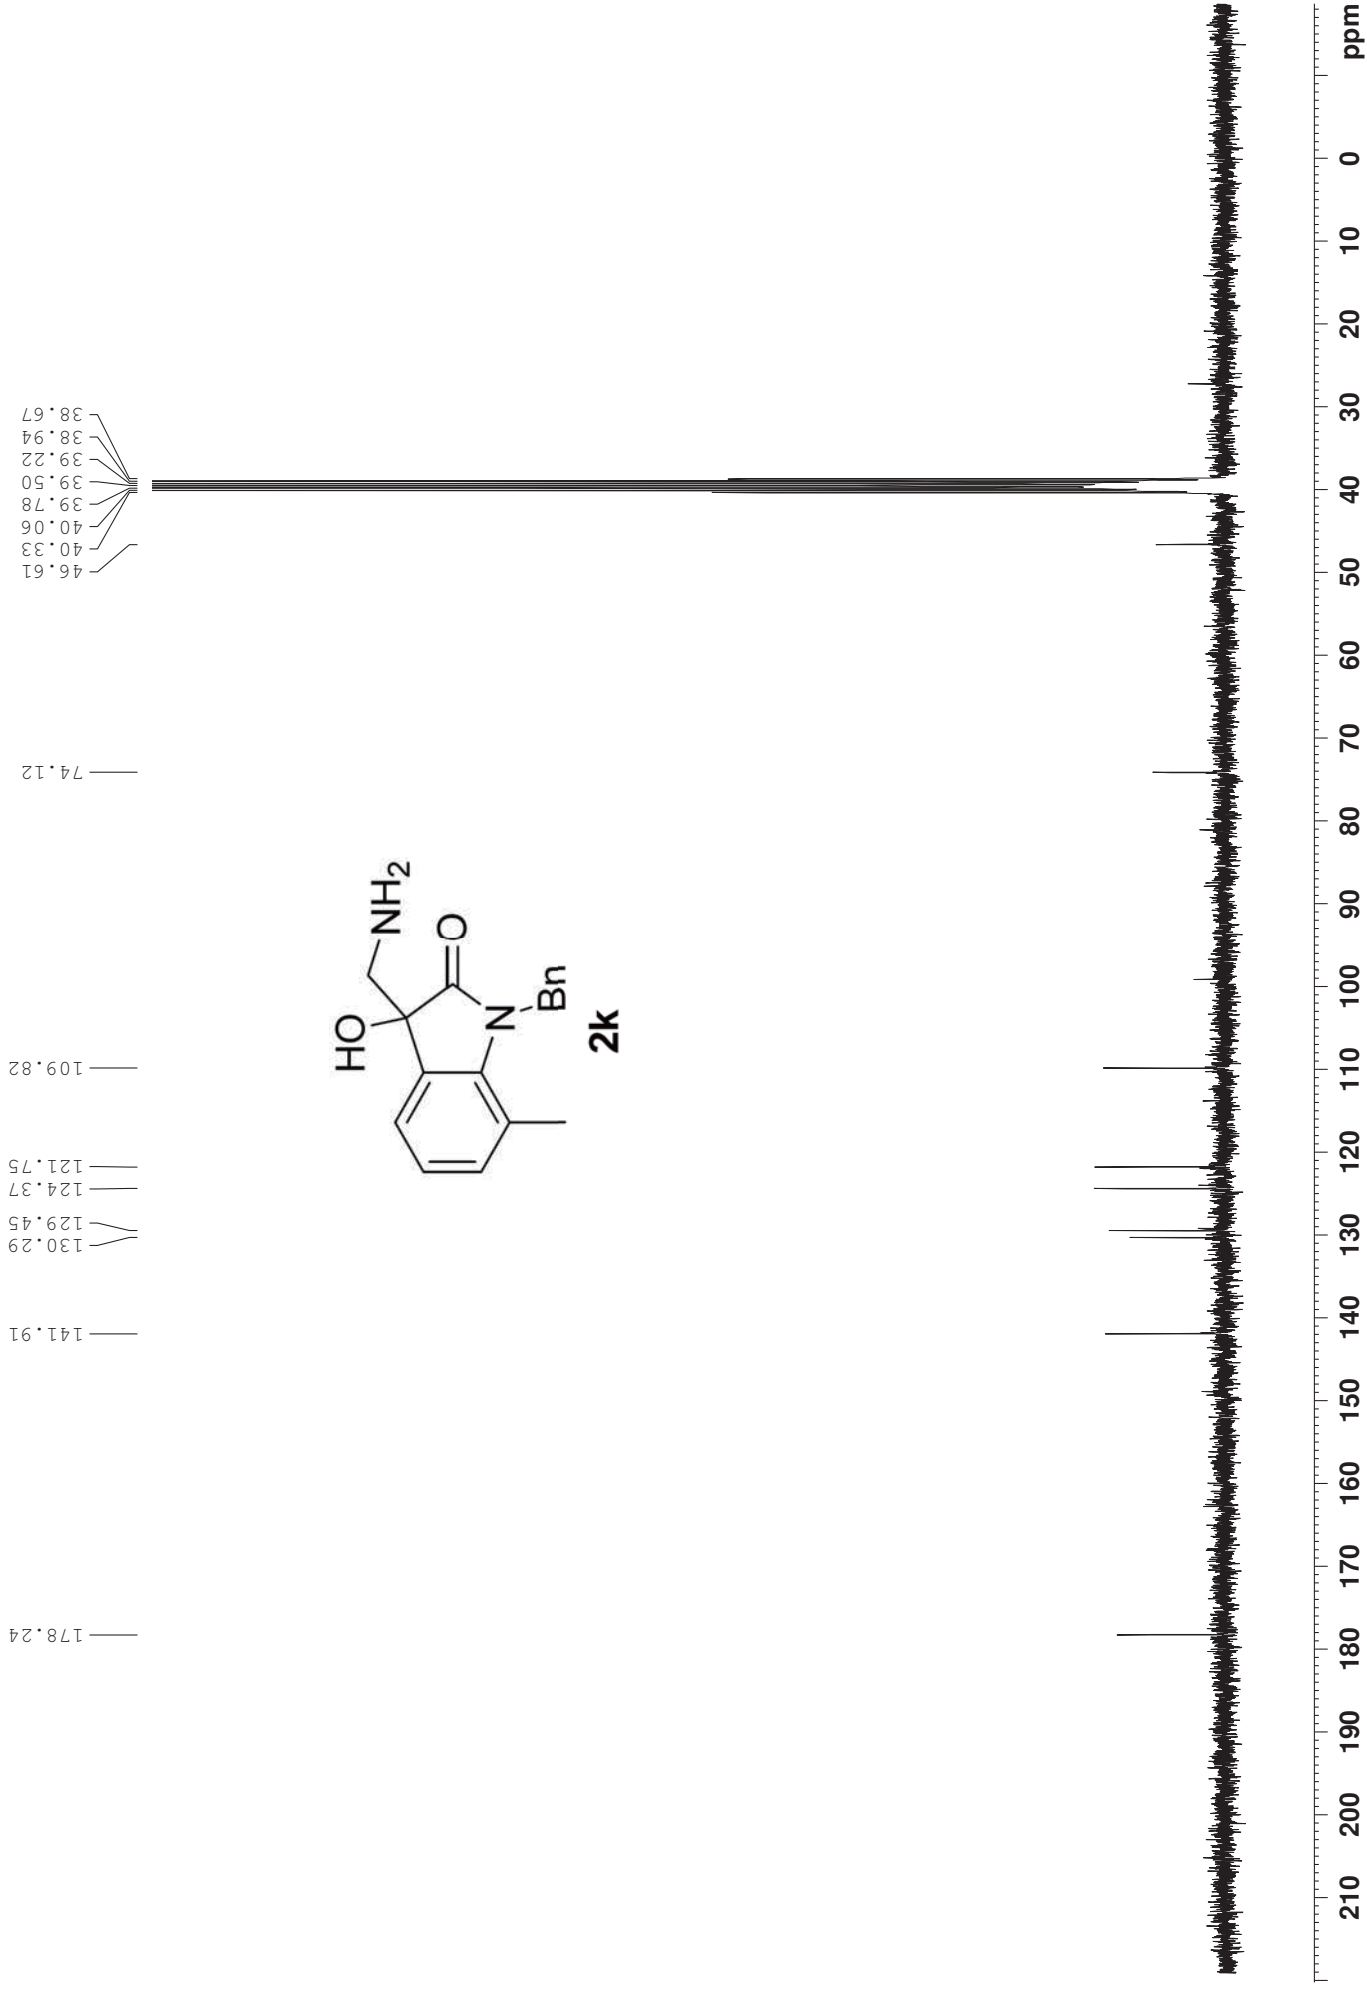

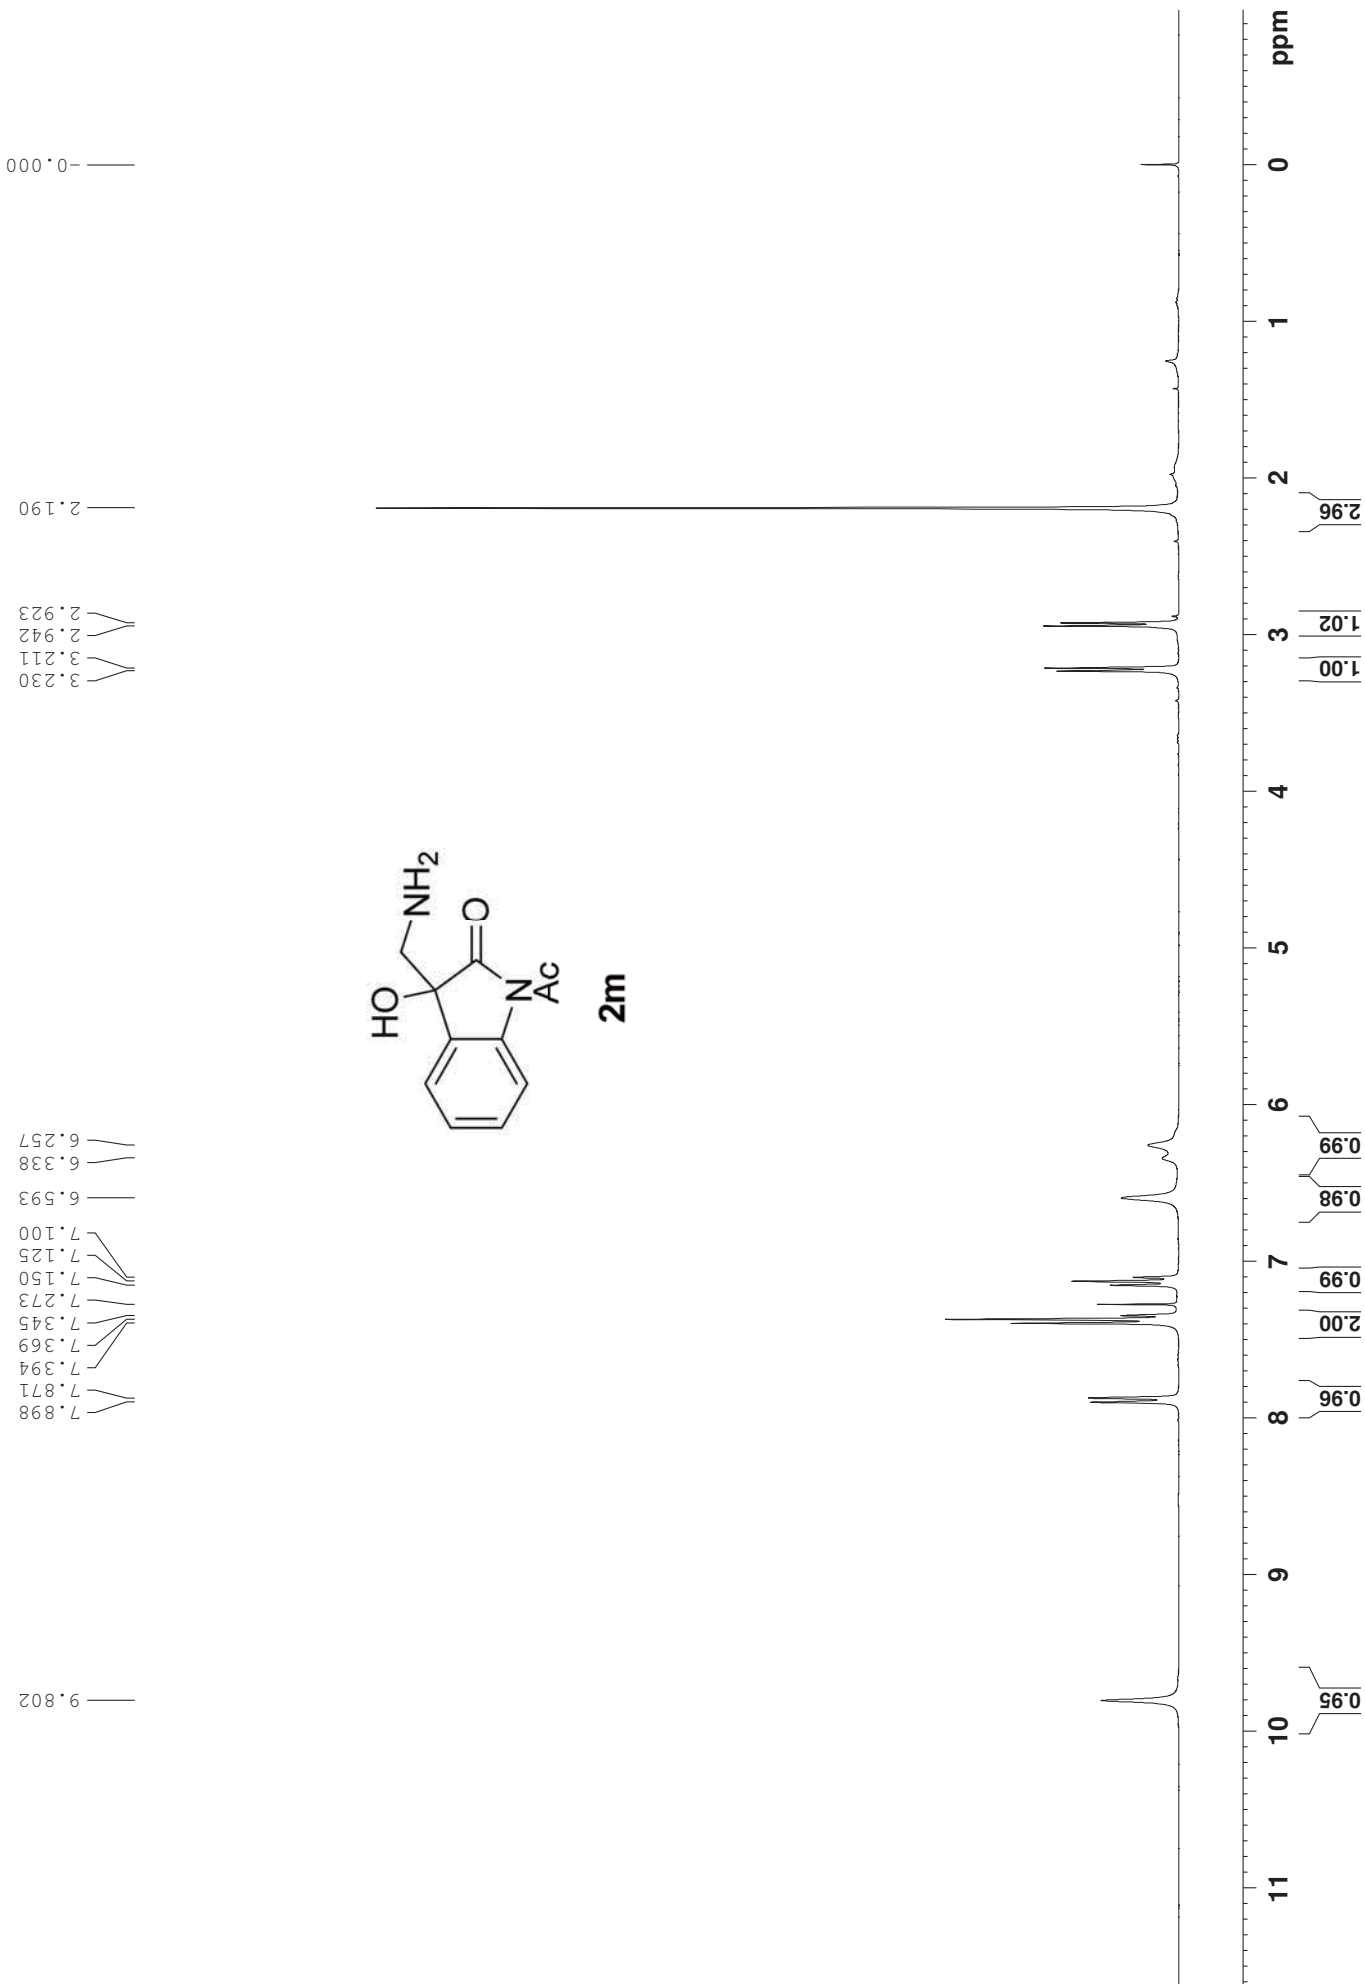

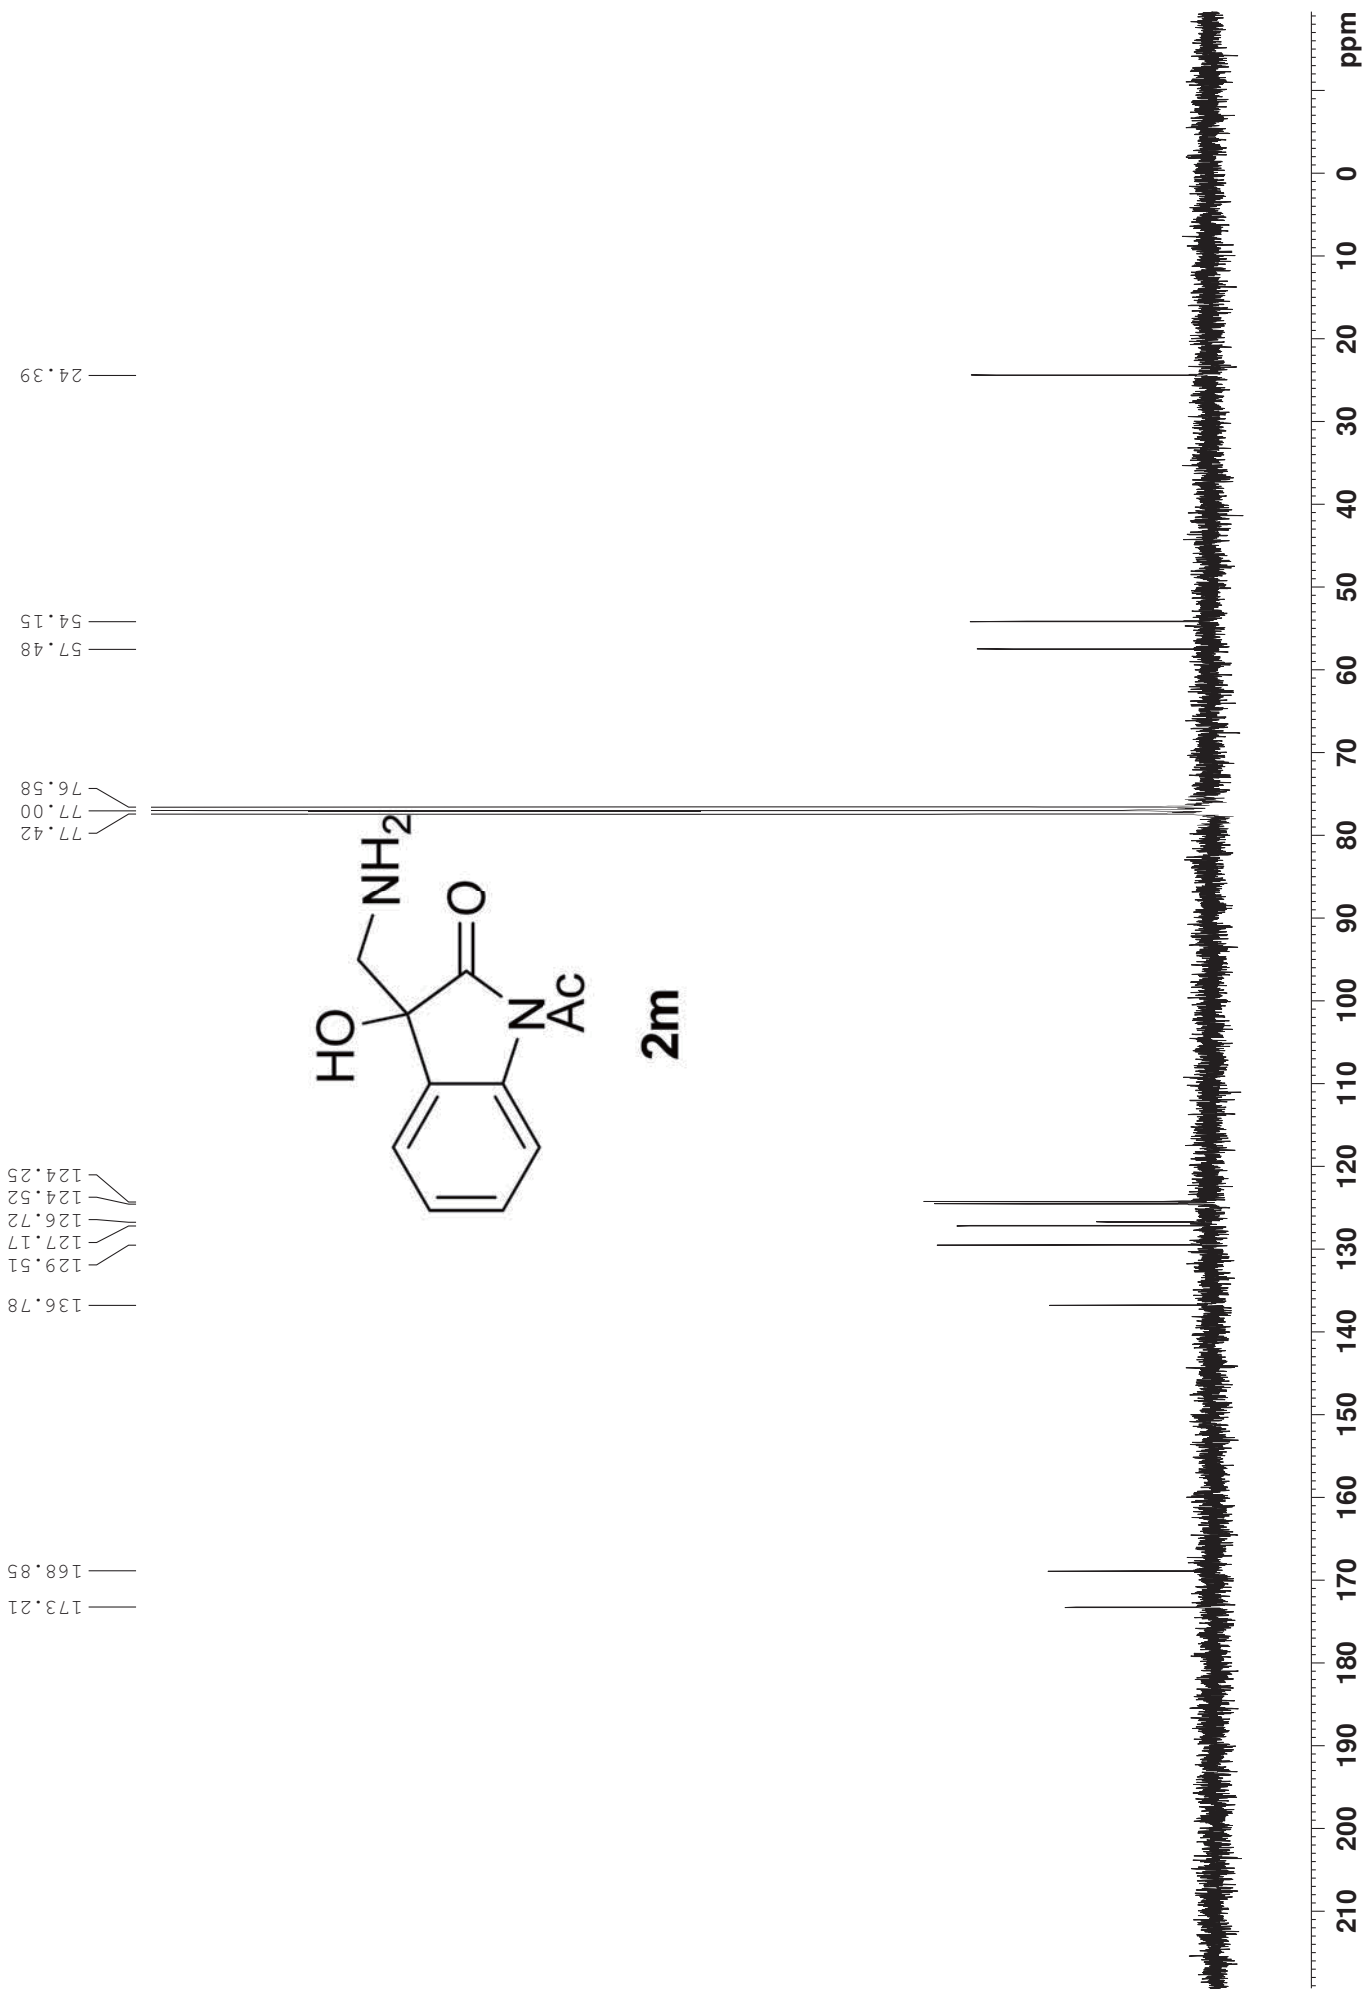

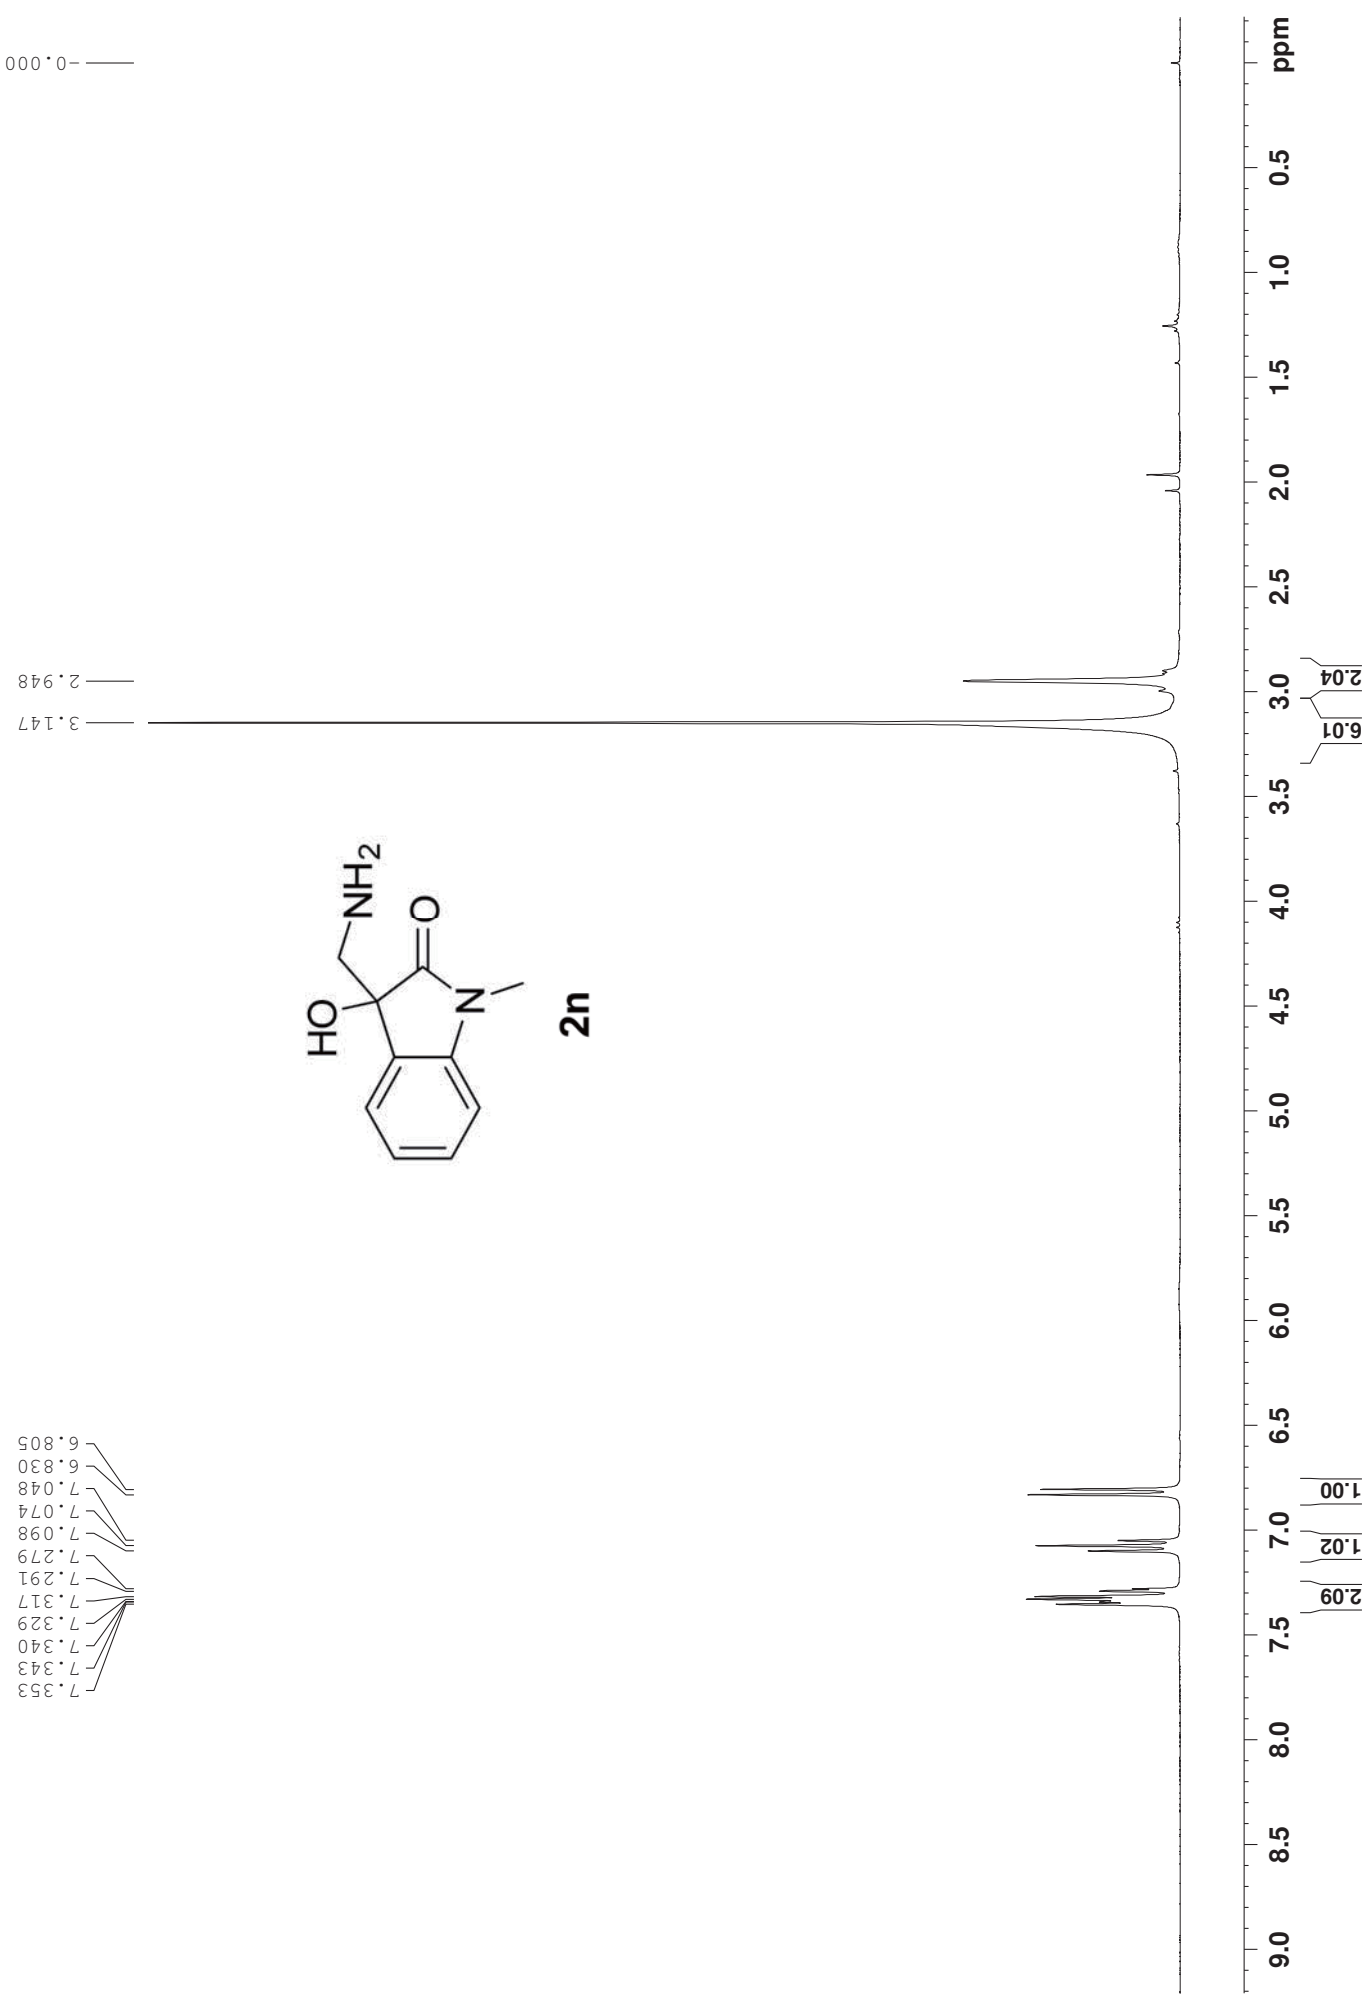

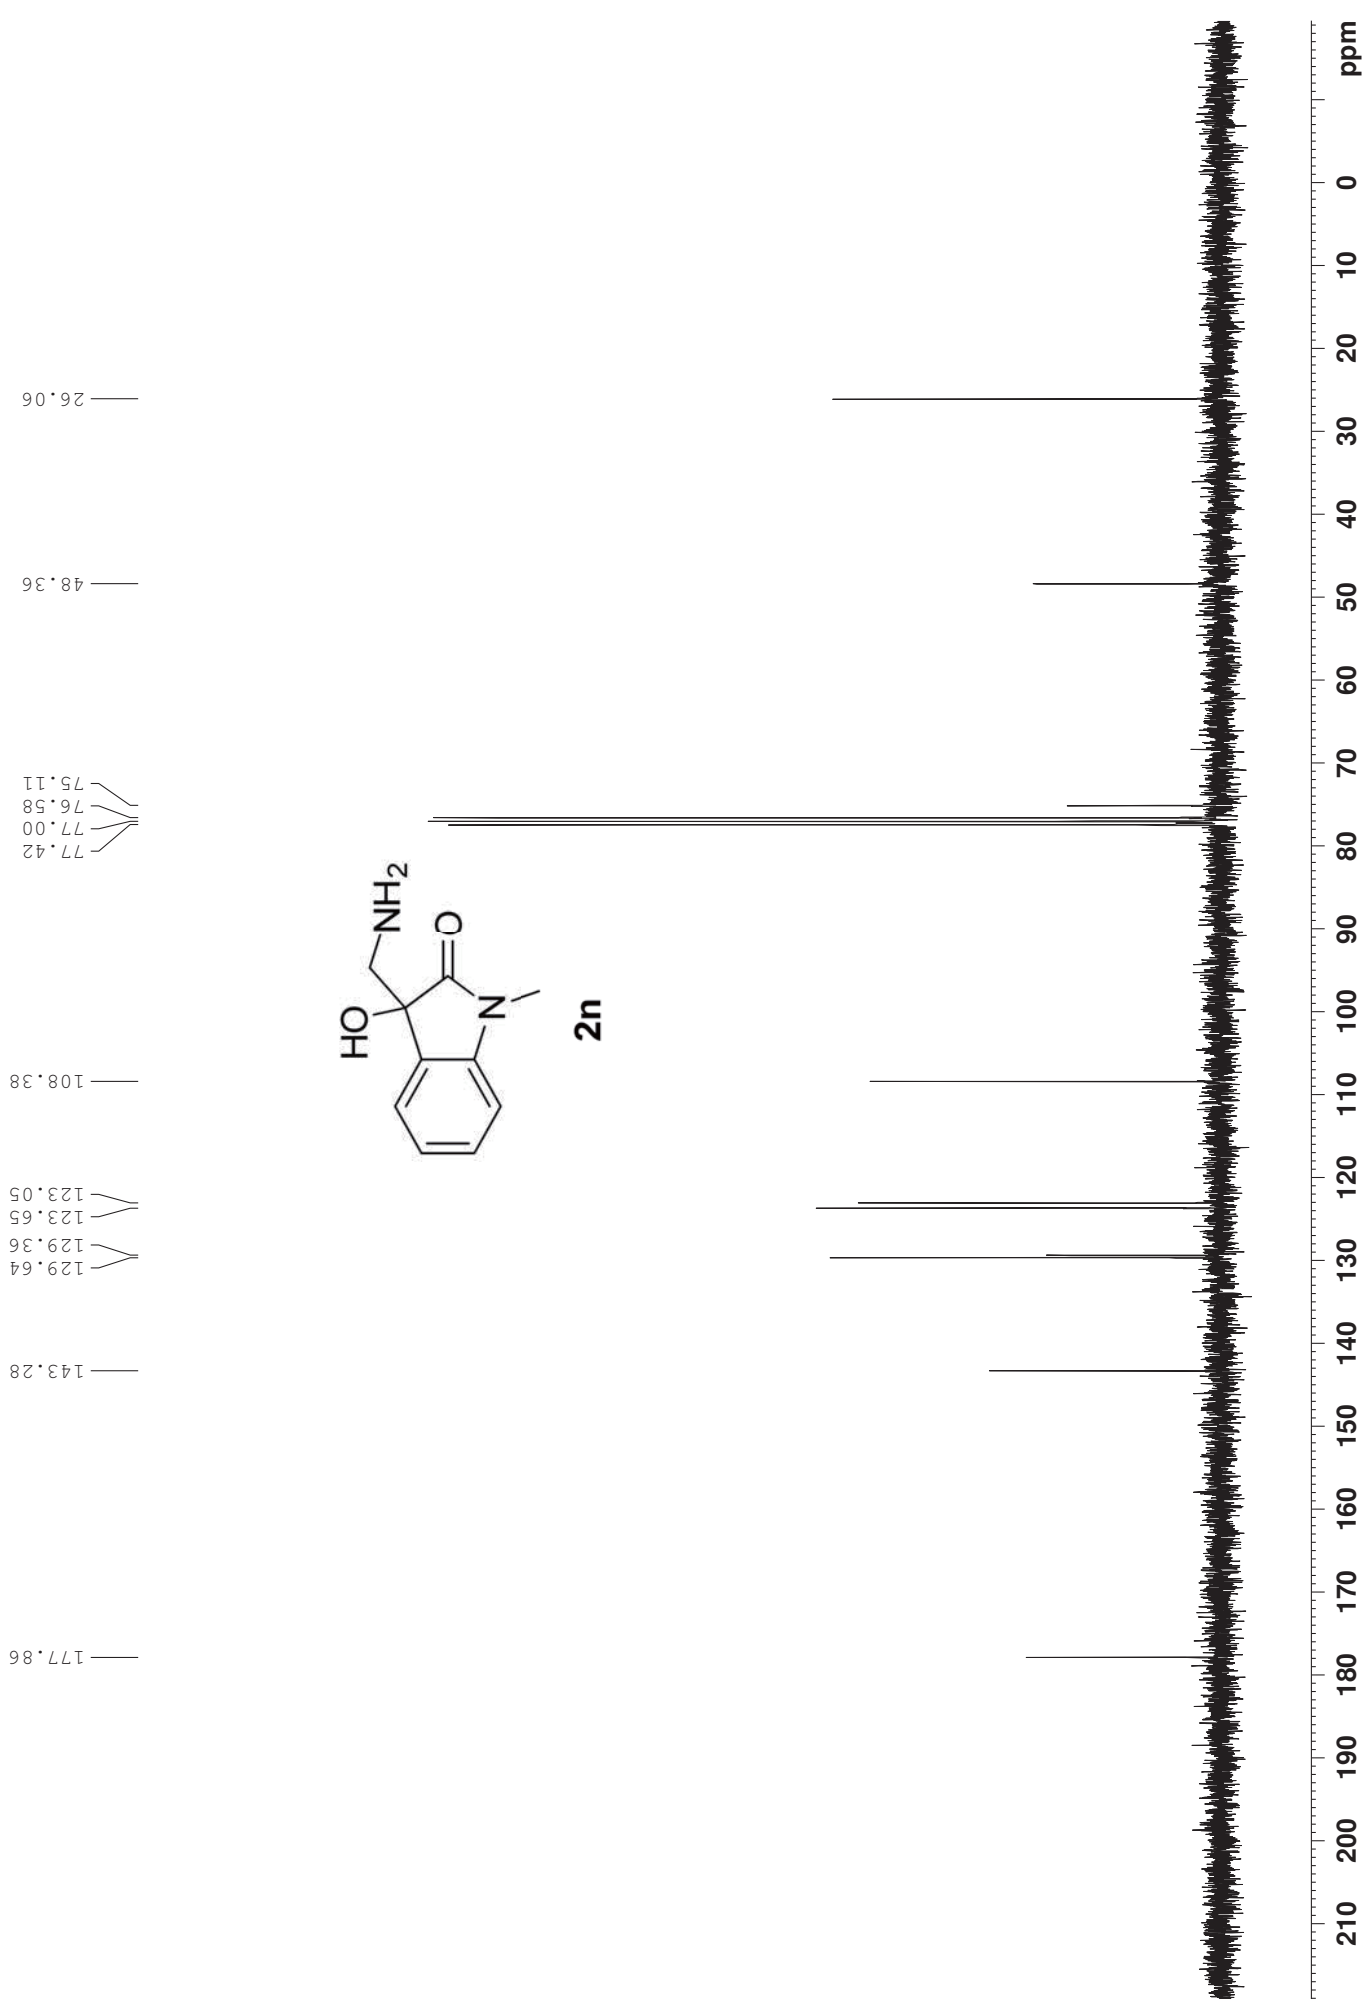

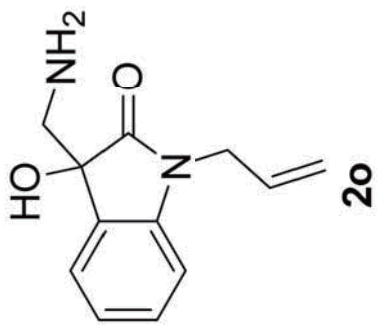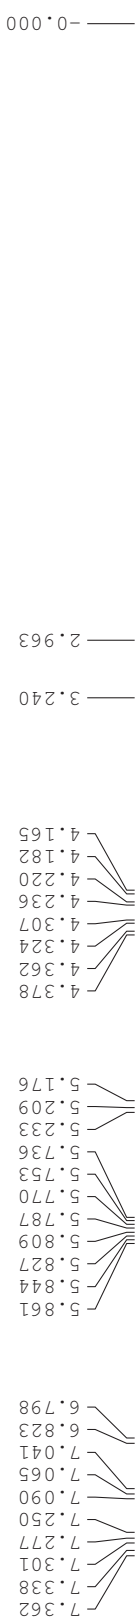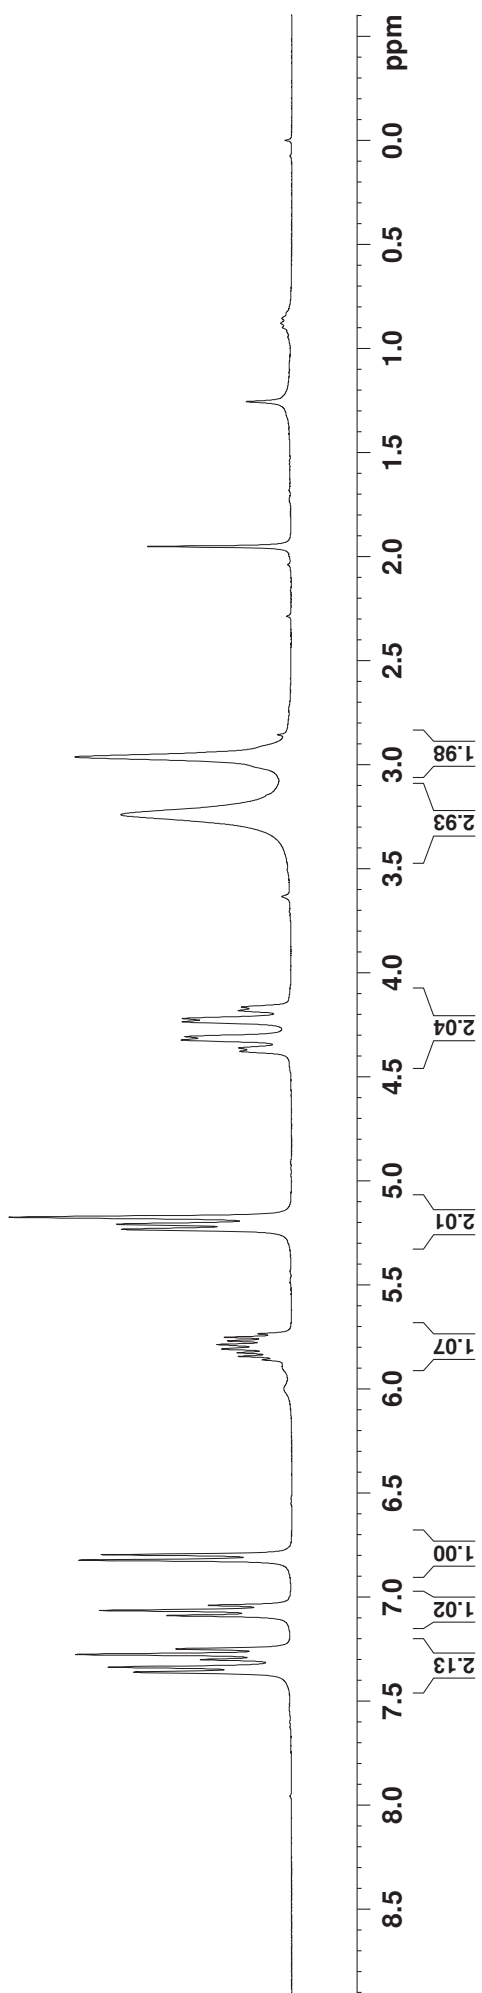

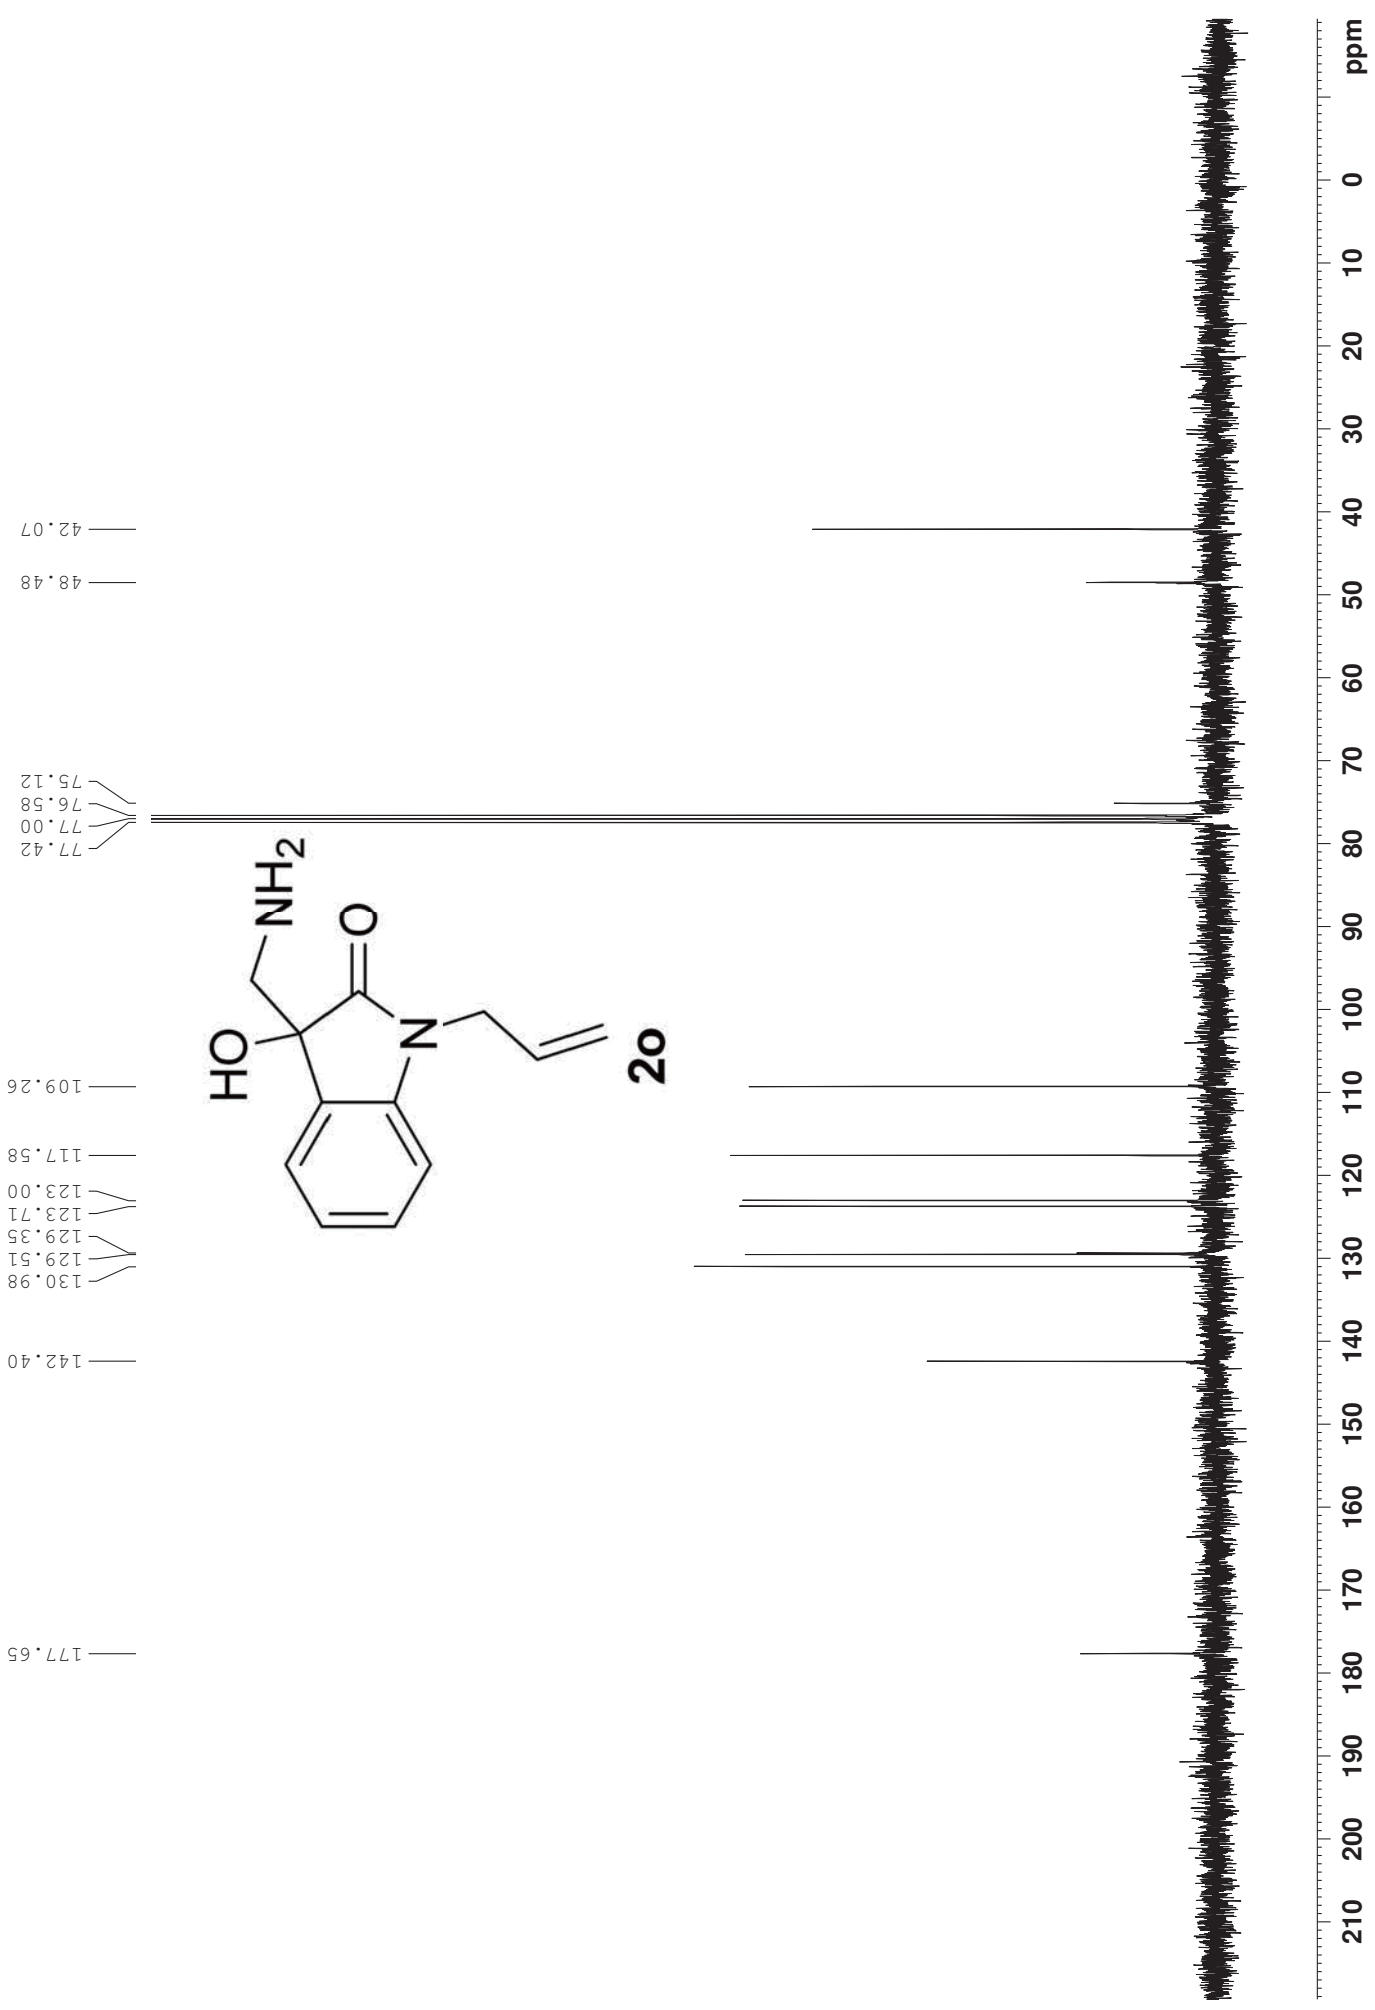

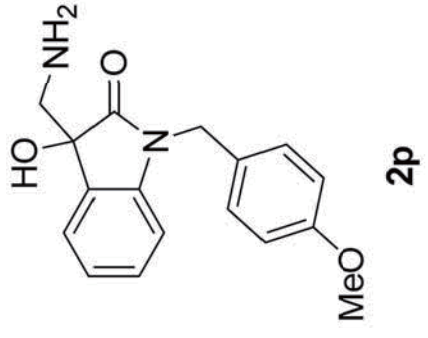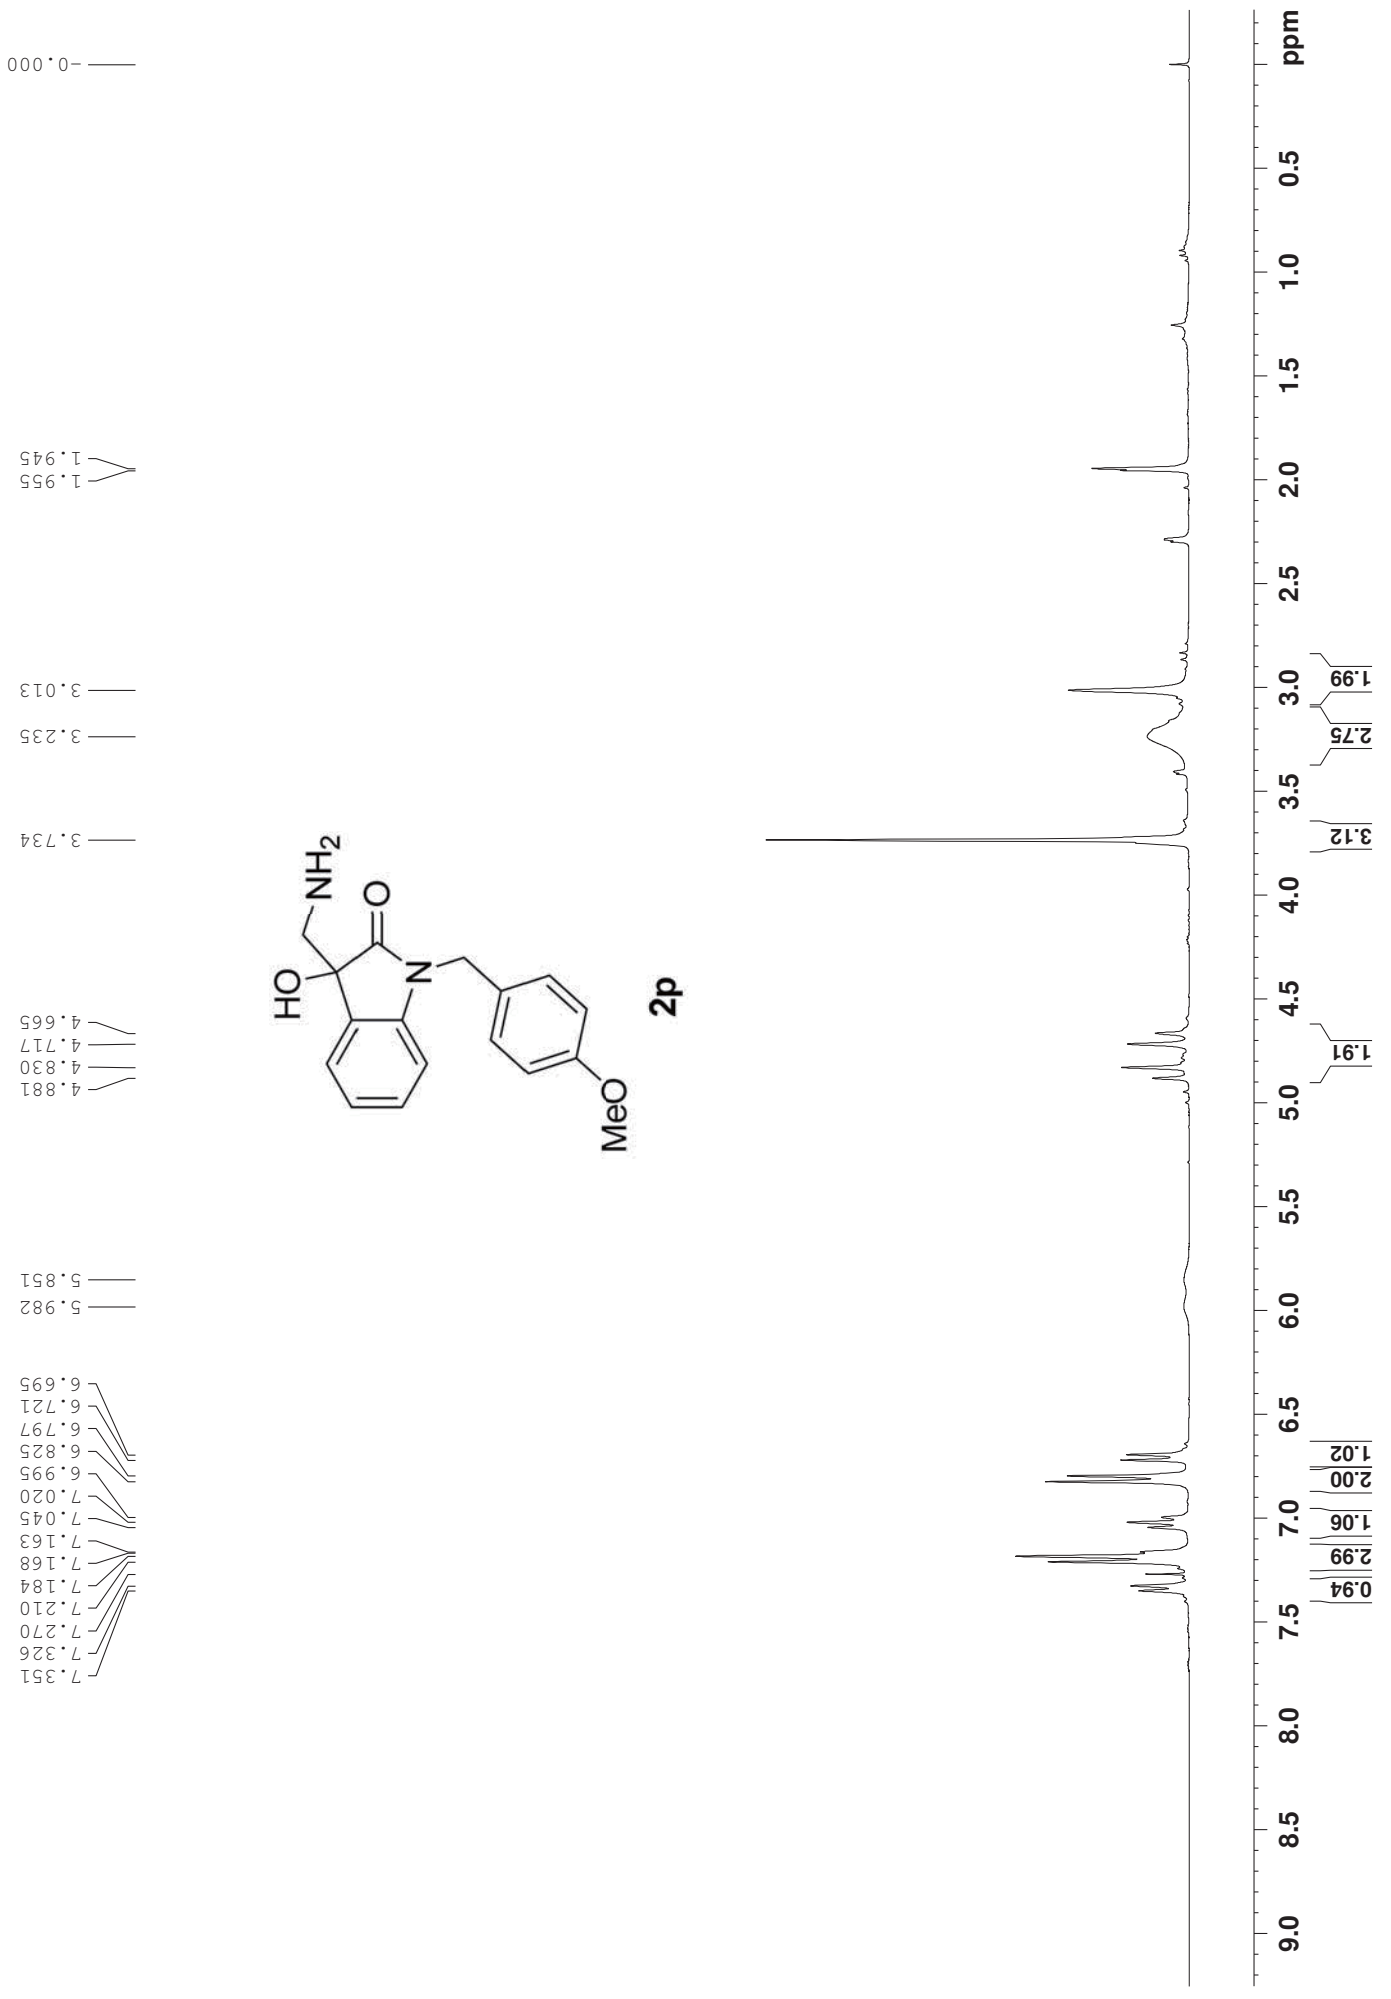



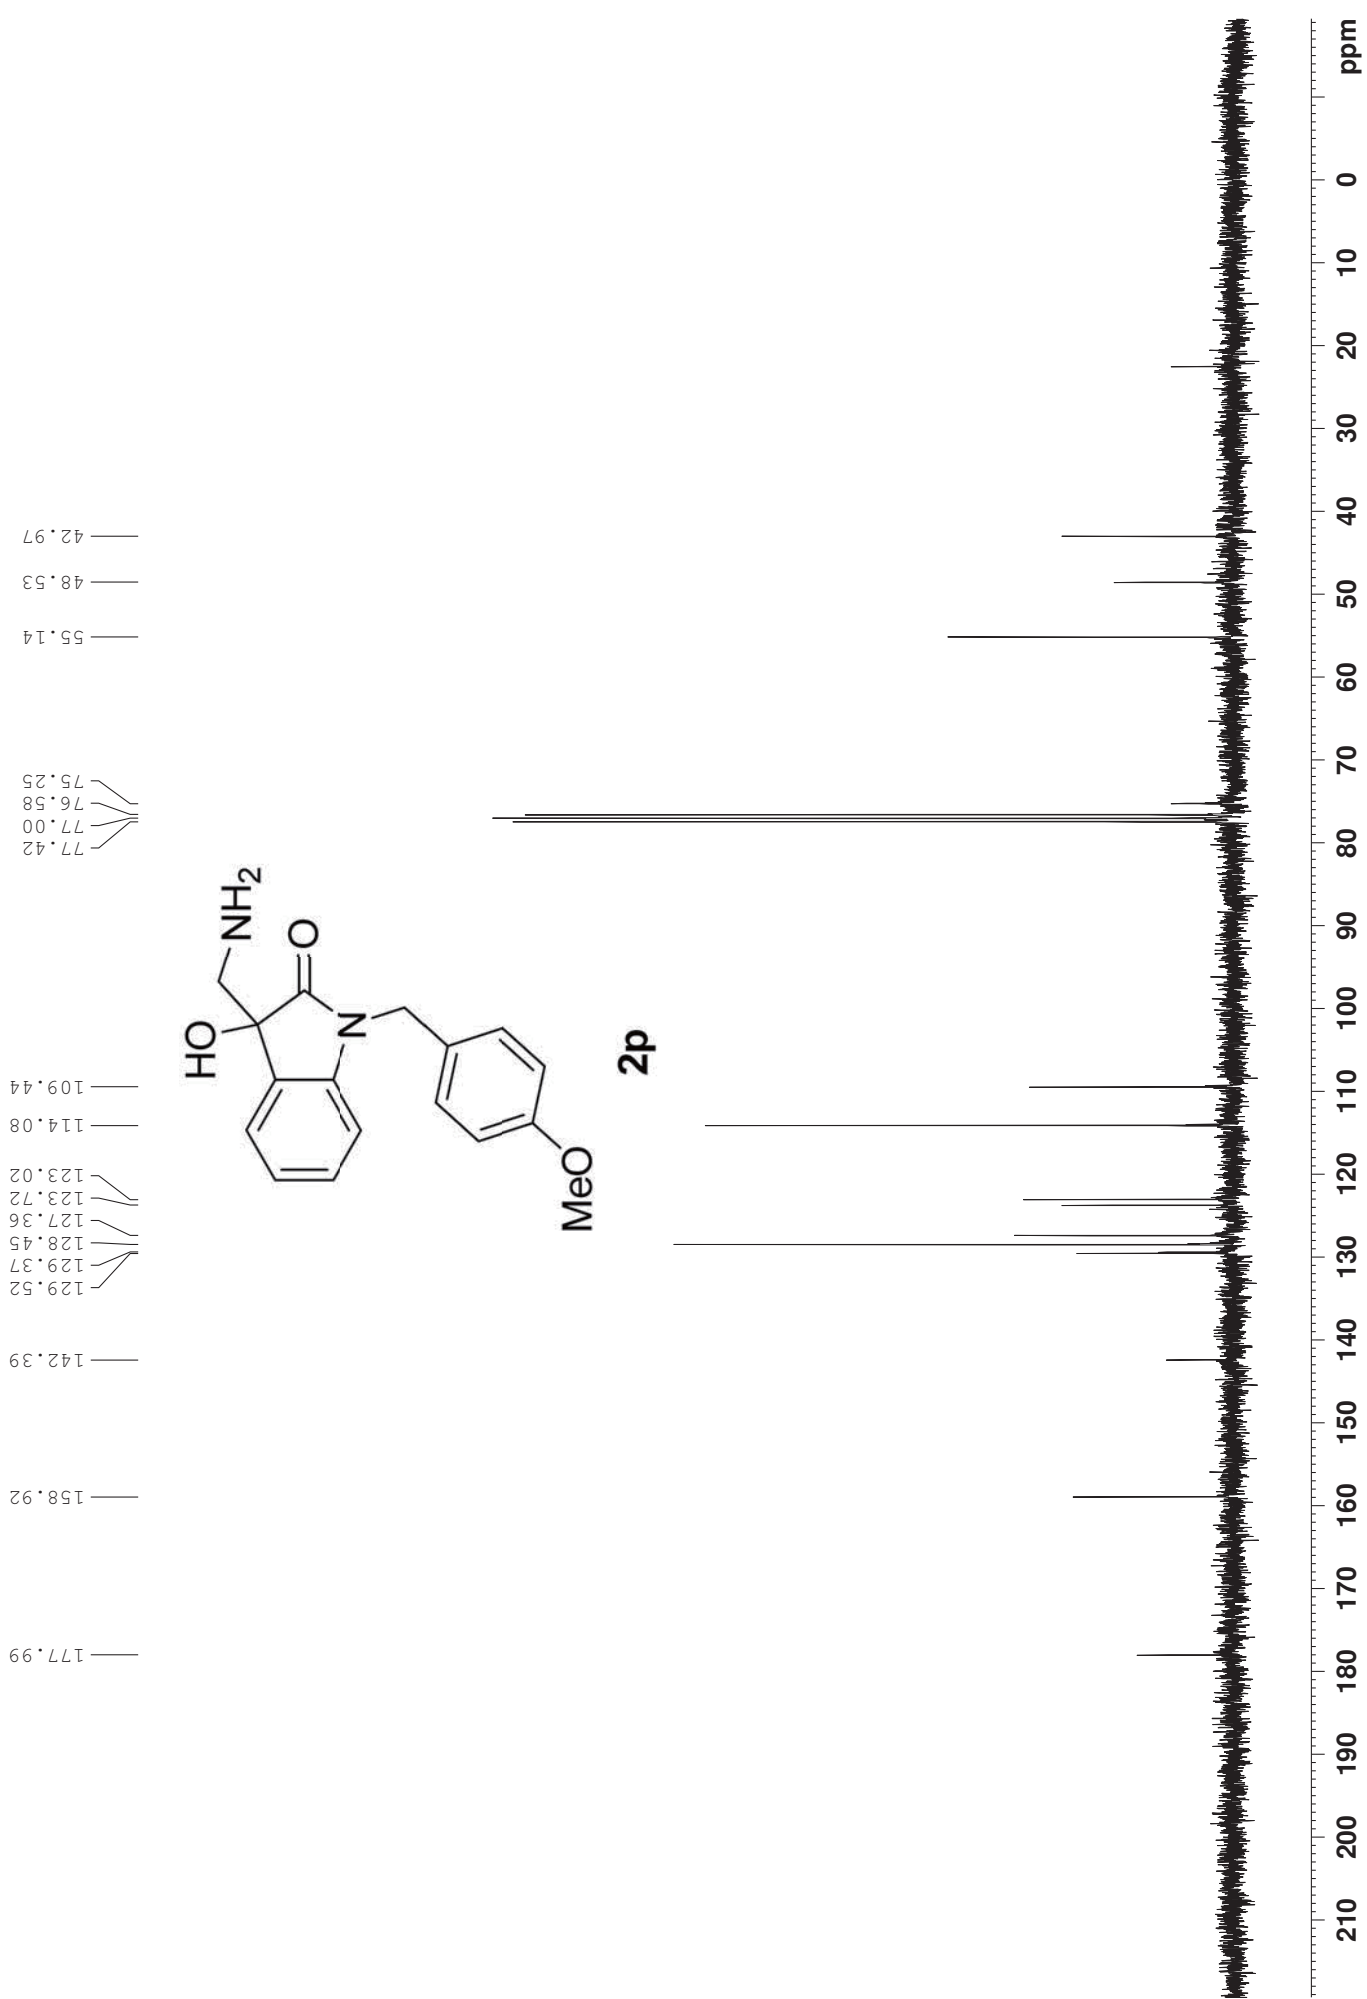

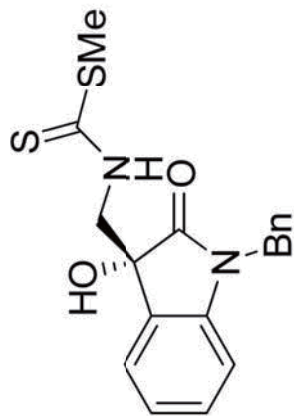

3

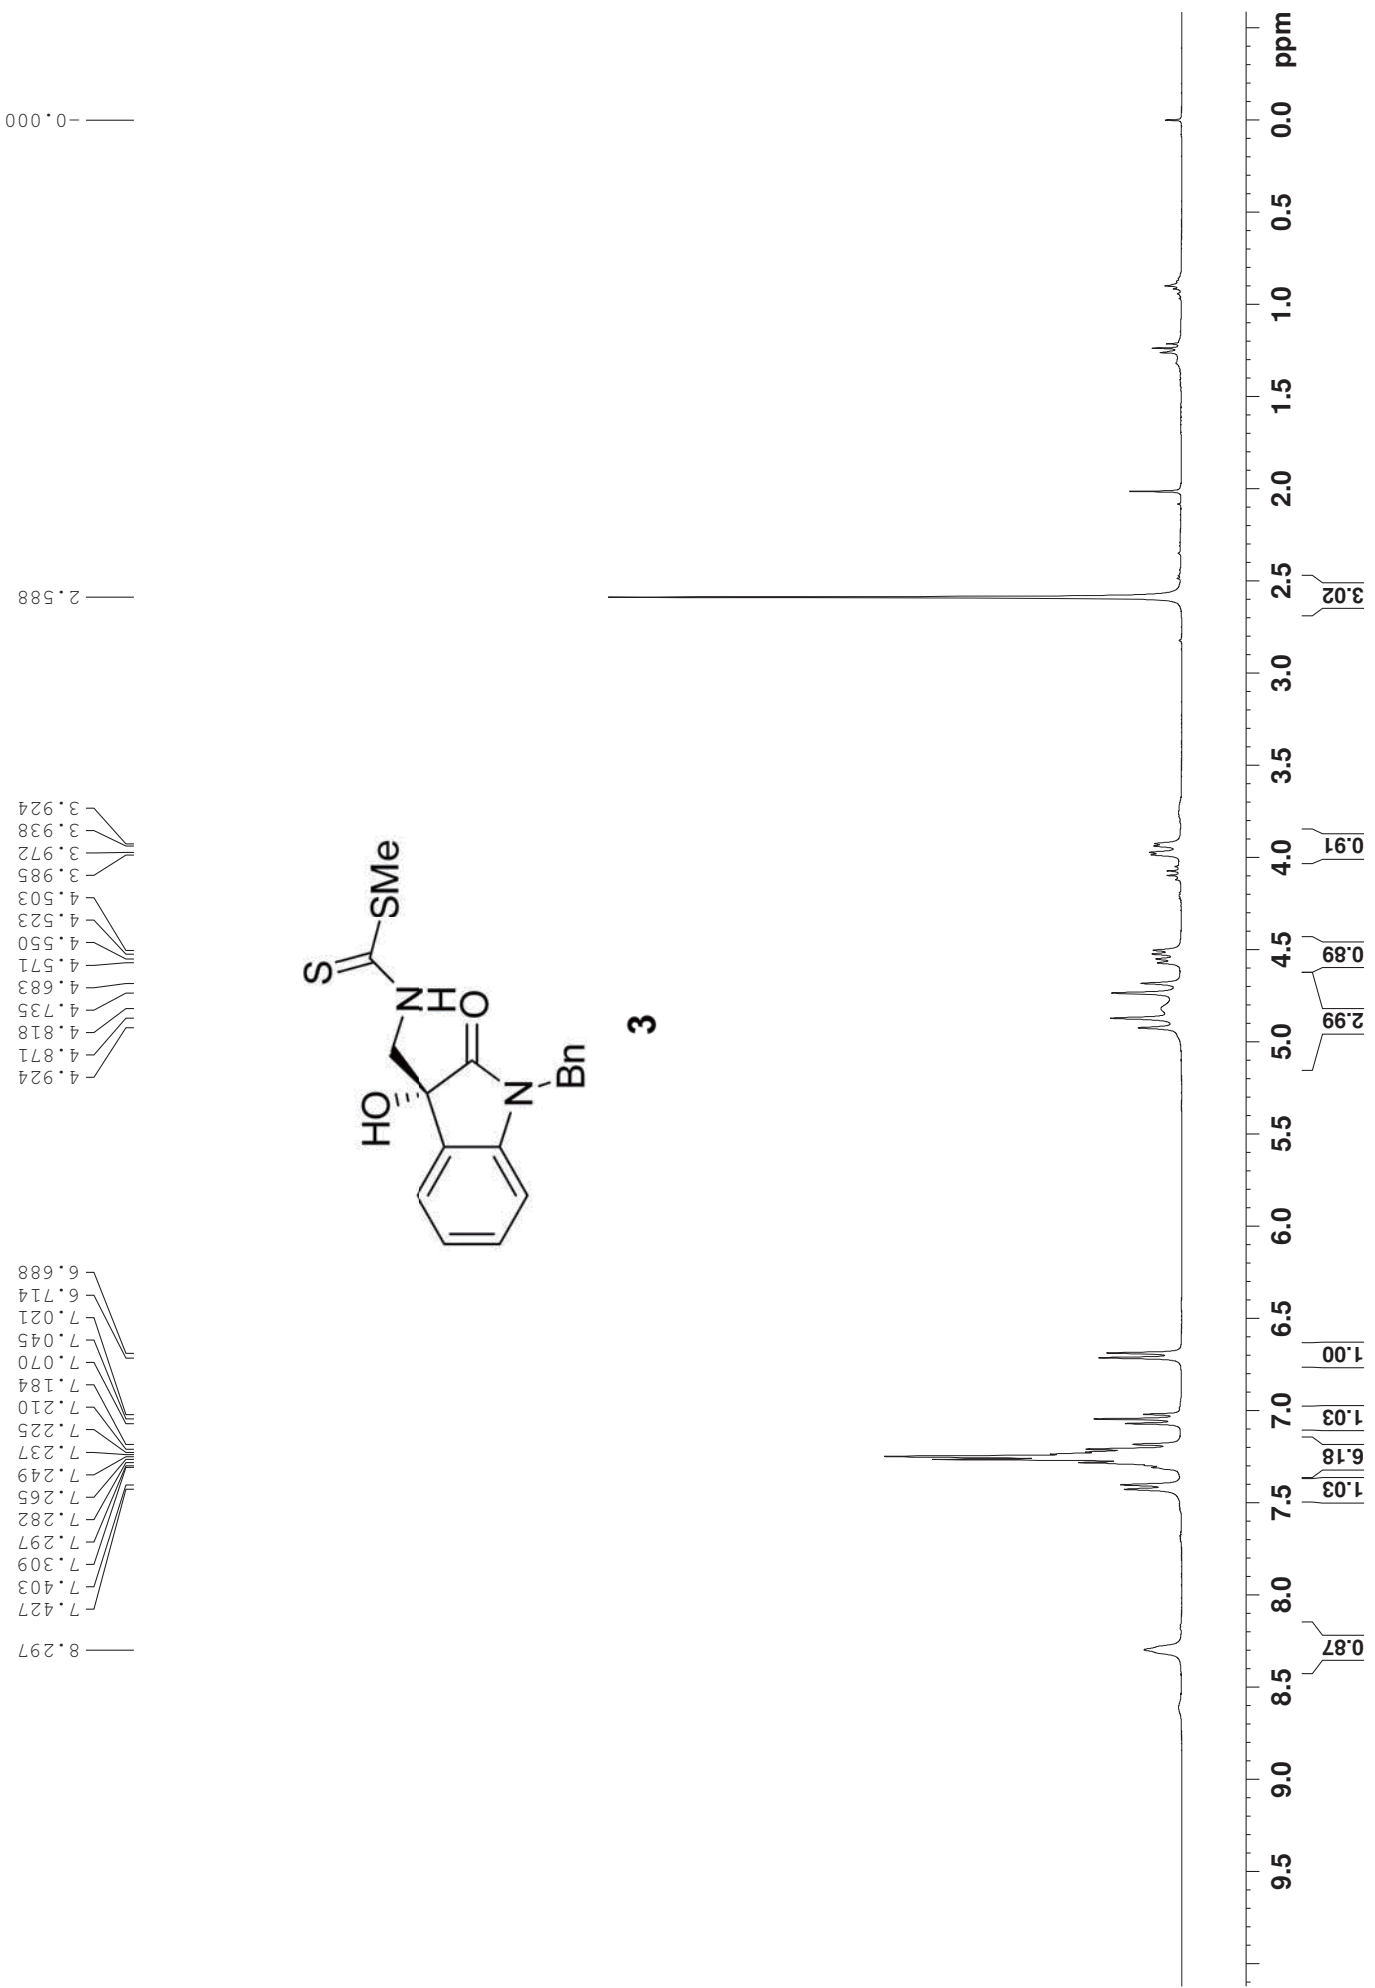

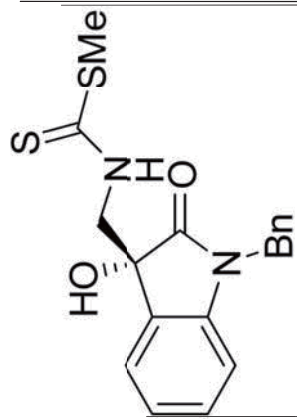

3

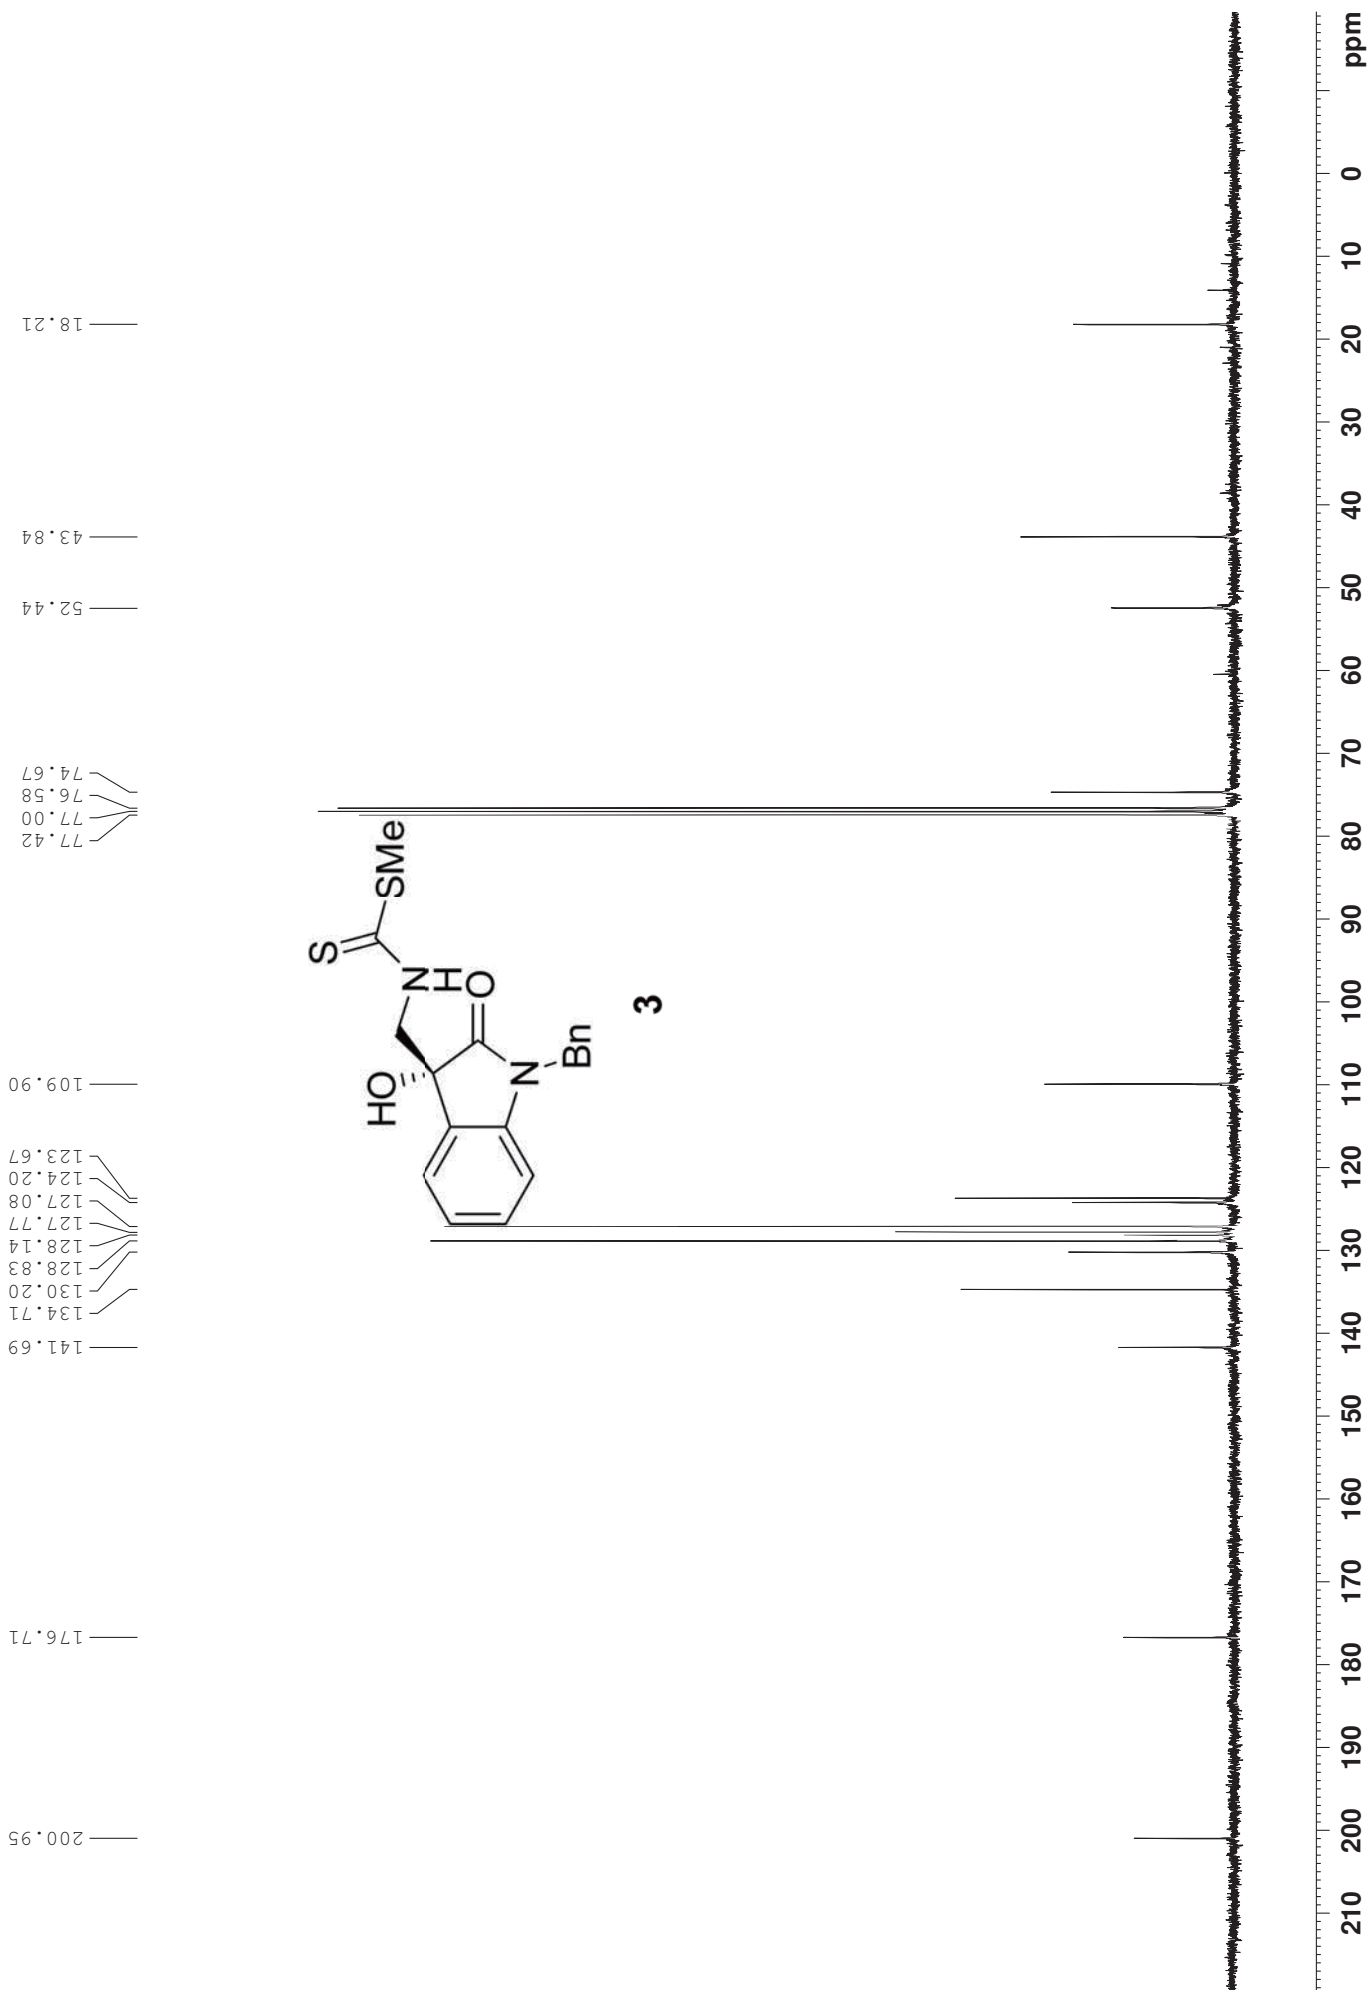

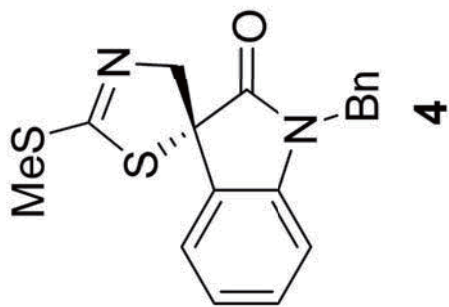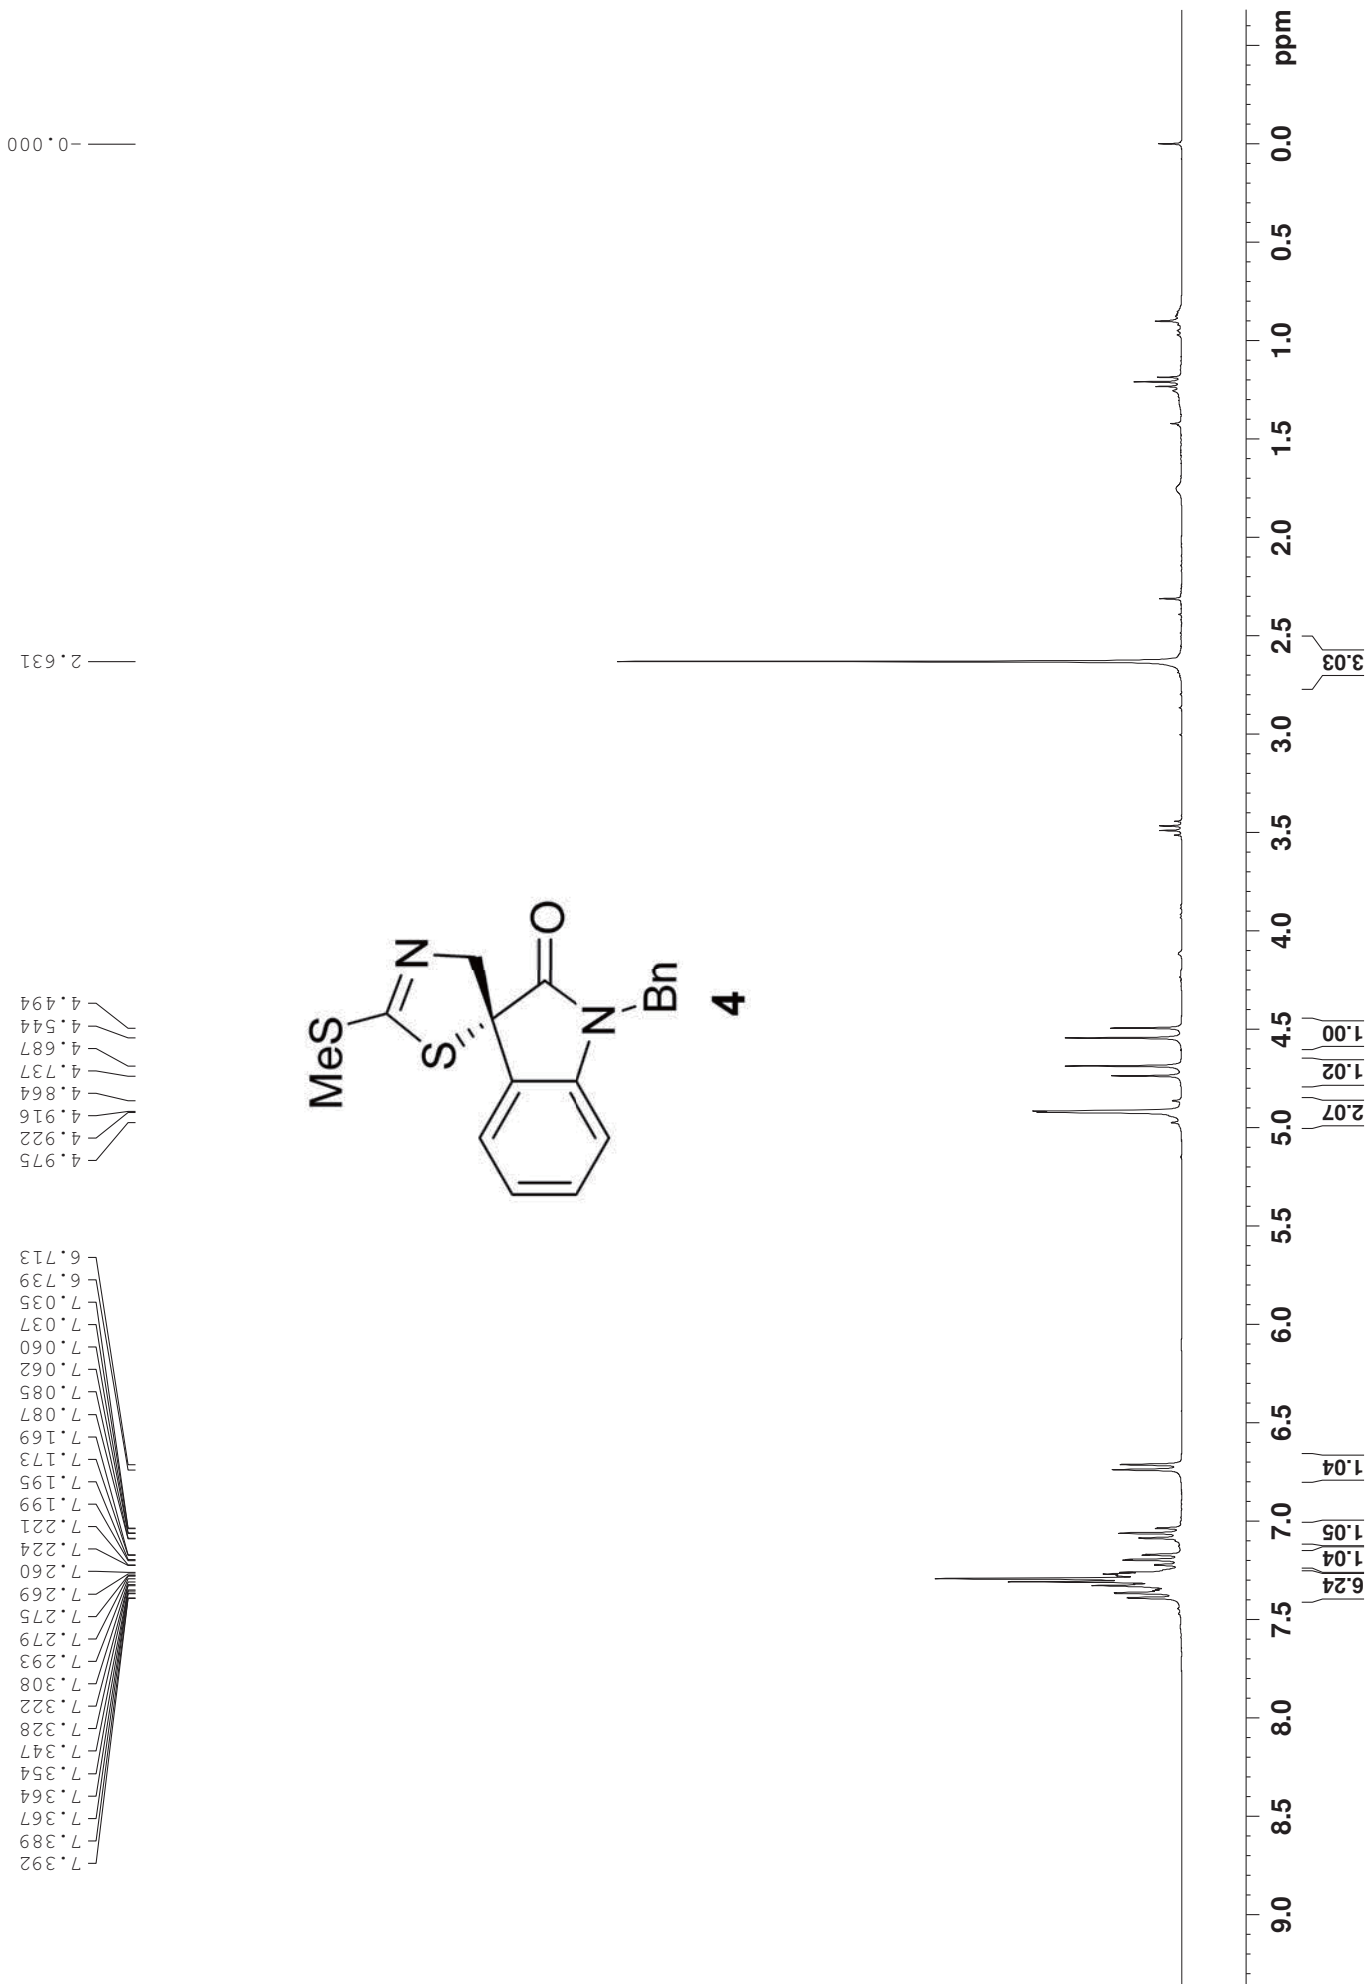

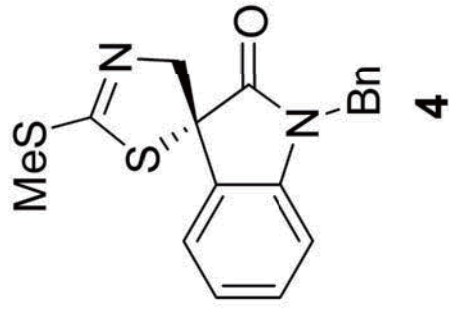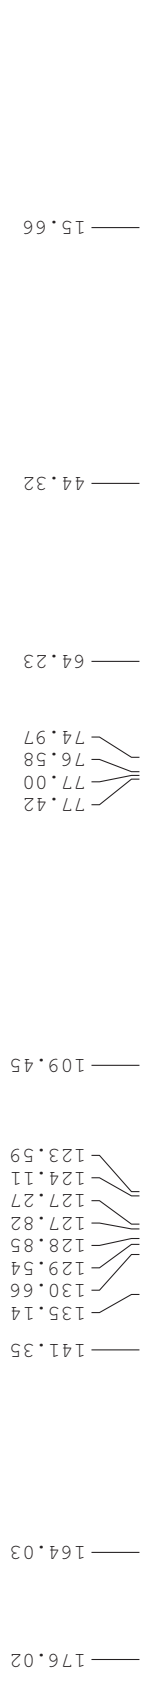

Supplement: c7gc00438a1.pdf [file c7gc00438a1.pdf]
